# Supplementary material for: Life on Pálava Hills in the Urnfield period through the perspective of a metal-detecting survey
Source: publisher site journal article supplement (doi:10.1515/pz-2024-2001), 2024-07-03
Supplement: Supplementary file 1 [file Tabellen_S33_59.pdf › Tabellen_S33_59.pdf]

**Tab. 1:** List of Bronze Age items found during the metal-detecting prospections on Pálava Hills between 2008–2022.

| Item     | Type        | Description                  | Frag.    | GPS  | Max. d. | Weight | Fig.              |
|----------|-------------|------------------------------|----------|------|---------|--------|-------------------|
| BA01_001 | Sickle      | Sickle blade fragment        | Fragment | GPS  | 20      | 2,5    | Sup. Fig. 17.e.5  |
| BA01_002 | Awl         | Square-profile rod awl       | Complete | GPS  | 33      | 1      | Sup. Fig. 17.e.3  |
| BA01_003 | Axe         | Axe fragment                 | Fragment | GPS  | 40      | 59     | Sup. Fig. 17.e.8  |
| BA01_004 | Sickle      | Sickle blade fragment        | Fragment | GPS  | 26      | 4      | Sup. Fig. 17.e.6  |
| BA01_005 | Ingot       | PC ingot fragment            | Raw mat. | GPS  | 50      | 39,5   | Sup. Fig. 17.e.16 |
| BA01_006 | Pin         | Wheel-headed pin?            | Fragment | GPS  | 74      | 5      | Sup. Fig. 17.e.2  |
| BA01_007 | Sickle      | Sickle point fragment        | Fragment | GPS  | 42      | 6,5    | Sup. Fig. 17.e.4  |
| BA01_008 | Arrowhead   | Mandrel arrowhead            | Complete | GPS  | 41      | 4      | Sup. Fig. 17.e.7  |
| BA01_009 | Ingot       | PC ingot fragment            | Raw mat. | GPS  | 36      | 27     | Sup. Fig. 17.e.14 |
| BA01_010 | Ingot       | PC ingot fragment            | Raw mat. | GPS  | 39      | 27     | Sup. Fig. 17.e.15 |
| BA01_011 | Ingot       | PC ingot fragment            | Raw mat. | GPS  | 38      | 17,5   | Sup. Fig. 17.e.17 |
| BA01_012 | Ingot       | PC ingot fragment            | Raw mat. | GPS  | 25      | 12     | Sup. Fig. 17.e.18 |
| BA01_013 | Ingot       | PC ingot fragment            | Raw mat. | GPS  | 20      | 6      | Sup. Fig. 17.e.21 |
| BA01_014 | Pin         | Spindle-headed pin           | Fragment | GPS  | 44      | 3,5    | Sup. Fig. 17.e.1  |
| BA01_015 | n/a         | Sheet fragment               | Fragment | GPS  | 28,5    | 3      | Sup. Fig. 17.e.9  |
| BA01_016 | Ingot       | PC ingot fragment            | Raw mat. | GPS  | 30      | 31     | Sup. Fig. 17.e.19 |
| BA01_017 | Ingot       | PC ingot fragment            | Raw mat. | GPS  | 27      | 10     | Sup. Fig. 17.e.22 |
| BA01_018 | Droplet     | Amorphous droplet            | Raw mat. | GPS  | 34      | 23     | Sup. Fig. 17.e.20 |
| BA01_019 | Ingot       | PC ingot fragment            | Raw mat. | GPS  | 19,5    | 7      | Sup. Fig. 17.e.23 |
| BA01_020 | Ingot       | PC ingot fragment            | Raw mat. | GPS  | 18      | 6,5    | Sup. Fig. 17.e.10 |
| BA01_021 | Droplet     | Amorphous droplet            | Raw mat. | GPS  | 20,5    | 4      | Sup. Fig. 17.e.11 |
| BA01_022 | Droplet     | Amorphous droplet            | Raw mat. | GPS  | 30      | 7      | Sup. Fig. 17.e.12 |
| BA01_023 | Ingot       | PC ingot fragment            | Raw mat. | GPS  | 21      | 15     | Sup. Fig. 17.e.13 |
| BA02_001 | Sickle      | Sickle point fragment        | Fragment | GPS  | 24      | 3      | Sup. Fig. 17.f.1  |
| BA02_002 | n/a         | Unidentifiable item          | Fragment | GPS  | 28      | 5      | Sup. Fig. 17.f.2  |
| BA02_003 | n/a         | Unidentifiable item          | Fragment | GPS  | 23,5    | 4      | Sup. Fig. 17.f.3  |
| HV03_001 | Pin         | Globular-headed perf. pin    | Complete | Site | 44,5    | 4,5    | Sup. Fig. 17.g.1  |
| KL01_001 | Mace        | Socket of a mace             | Fragment | GPS  | 47      | 28     | Sup. Fig. 11:5    |
| KL01_002 | Sickle      | Rear part of a tanged sickle | Fragment | GPS  | 82      | 36,5   | Sup. Fig. 11:6    |
| KL01_003 | Cuff        | Borotice type cuff bracelet  | Fragment | GPS  | 72      | 12     | Sup. Fig. 11:7    |
| KL01_004 | Ring        | Cast ring                    | Complete | GPS  | 21      | 1      | Sup. Fig. 11:12   |
| KL01_005 | Finger ring | Finger ring?                 | Complete | GPS  | 25      | 5      | Sup. Fig. 11:13   |
| KL01_007 | Sickle      | Knobbed sickle fragment      | Fragment | GPS  | 22      | 6      | Sup. Fig. 11:10   |
| KL01_008 | n/a         | Unidentifiable item          | Fragment | GPS  | 10      | 0,5    | Sup. Fig. 11:11   |
| KL01_009 | Axe         | Axe socket fragment          | Fragment | GPS  | 33      | 13,5   | Sup. Fig. 11:17   |
| KL01_010 | Waste       | Pouring cup sprue            | Raw mat. | GPS  | 24      | 10     | Sup. Fig. 11:18   |
| KL01_011 | Waste       | Pouring cup sprue            | Raw mat. | GPS  | 24      | 3      | Sup. Fig. 11:19   |
| KL01_012 | n/a         | Sheet fragment               | Fragment | GPS  | 27      | 2,5    | Sup. Fig. 11:20   |
| KL01_013 | Sickle      | Sickle tang fragment         | Fragment | GPS  | 35      | 8      | Sup. Fig. 11:21   |
| KL01_014 | Ring        | Cast ring                    | Fragment | Site | 20,5    | 2      | Sup. Fig. 11:26   |
| KL01_015 | Ring        | Cast ring                    | Complete | Site | 19      | 2      | Sup. Fig. 11:27   |
| KL01_016 | Ring        | Cast ring                    | Complete | Site | 20      | 2      | Sup. Fig. 11:28   |
| KL01_017 | Ring        | Cast ring                    | Complete | Site | 20      | 2,5    | Sup. Fig. 11:29   |
| KL01_018 | Axe         | Axe blade fragment           | Fragment | Site | 17      | 3      | Sup. Fig. 11:30   |
| KL01_019 | Waste       | Casting sprue                | Raw mat. | Spot | 24      | 9      | Sup. Fig. 11:31   |
| KL01_020 | Waste       | Casting sprue                | Raw mat. | Spot | 24      | 5,5    | Sup. Fig. 11:32   |
| KL01_021 | n/a         | Sheet fragment               | Fragment | Site | 20      | 1      | Sup. Fig. 11:67   |
| KL01_022 | Ingot       | PC ingot fragment            | Raw mat. | Spot | 15      | 4      | Sup. Fig. 11:36   |
| KL01_023 | Ingot       | PC ingot fragment            | Raw mat. | Spot | 55      | 49     | Sup. Fig. 11:37   |
| KL01_024 | Ingot       | PC ingot fragment            | Raw mat. | Spot | 46      | 41     | Sup. Fig. 11:38   |
| KL01_025 | Ingot       | PC ingot fragment            | Raw mat. | Spot | 20      | 6,5    | Sup. Fig. 11:39   |
| KL01_026 | Ingot       | PC ingot fragment            | Raw mat. | Spot | 25,5    | 11,5   | Sup. Fig. 11:40   |
| KL01_027 | Ingot       | PC ingot fragment            | Raw mat. | Spot | 20,5    | 10     | Sup. Fig. 11:41   |
| KL01_028 | Ingot       | PC ingot fragment            | Raw mat. | Spot | 31      | 12,5   | Sup. Fig. 11:42   |
| KL01_029 | Ingot       | PC ingot fragment            | Raw mat. | Spot | 37      | 32,5   | Sup. Fig. 11:69   |
| KL01_030 | Droplet     | Amorphous droplet            | Raw mat. | Site | 38      | 22     | Sup. Fig. 11:46   |
| KL01_031 | Ingot       | PC ingot fragment            | Raw mat. | GPS  | 32      | 18     | Sup. Fig. 11:47   |

Tab. 1 (continued)

| Item     | Type      | Description                | Frag.    | GPS  | Max. d. | Weight | Fig.            |
|----------|-----------|----------------------------|----------|------|---------|--------|-----------------|
| KL01_032 | Droplet   | Amorphous droplet          | Raw mat. | Site | 28,5    | 14,5   | Sup. Fig. 11:48 |
| KL01_033 | Droplet   | Amorphous droplet          | Raw mat. | Site | 48      | 31,5   | Sup. Fig. 11:49 |
| KL01_034 | Ingot     | PC ingot fragment          | Raw mat. | Site | 54      | 80     | Sup. Fig. 11:50 |
| KL01_035 | Ingot     | PC ingot fragment          | Raw mat. | Site | 30      | 12     | Sup. Fig. 11:51 |
| KL01_036 | Droplet   | Amorphous droplet          | Raw mat. | Site | 30      | 8,5    | Sup. Fig. 11:70 |
| KL01_037 | Droplet   | Amorphous droplet          | Raw mat. | GPS  | 33      | 32     | Sup. Fig. 11:55 |
| KL01_038 | Droplet   | Amorphous droplet          | Raw mat. | Site | 32,5    | 4,5    | Sup. Fig. 11:56 |
| KL01_039 | Ingot     | PC ingot fragment          | Raw mat. | Site | 32      | 30,5   | Sup. Fig. 11:57 |
| KL01_040 | Ingot     | PC ingot fragment          | Raw mat. | Site | 26      | 12,5   | Sup. Fig. 11:58 |
| KL01_041 | Droplet   | Amorphous droplet          | Raw mat. | Site | 33      | 15,5   | Sup. Fig. 11:59 |
| KL01_042 | Droplet   | Amorphous droplet          | Raw mat. | Site | 31      | 19     | Sup. Fig. 11:60 |
| KL01_043 | Ingot     | PC ingot fragment          | Raw mat. | Site | 30      | 16,5   | Sup. Fig. 11:61 |
| KL01_044 | Droplet   | Amorphous droplet          | Raw mat. | Site | 25      | 9,5    | Sup. Fig. 11:68 |
| KL01_045 | Ingot     | PC ingot fragment          | Raw mat. | Site | 18      | 16     | Sup. Fig. 11:62 |
| KL01_046 | Hammer    | Socket hammer              | Complete | GPS  | 62      | 164    | Sup. Fig. 11:66 |
| KL01_047 | Arrowhead | Socketed arrowhead         | Complete | GPS  | 45      | 4      | Sup. Fig. 11:82 |
| KL01_048 | Axe       | Socketed Axe               | Complete | GPS  | 100     | 143    | Sup. Fig. 11:89 |
| KL01_049 | n/a       | Unidentifiable item        | Fragment | GPS  | 44      | 19,5   | Sup. Fig. 11:88 |
| KL01_050 | Hoard     | 508 rings, 89 caps         | n/a      | Spot |         | 628    | Sup. Fig. 11:83 |
| KL01_051 | Pin       | Biconical-headed pin       | Complete | GPS  | 97      | 11,5   | Sup. Fig. 11:4  |
| KL01_052 | Knife     | Decorated knife blade      | Fragment | GPS  | 50,5    | 12,5   | Sup. Fig. 11:9  |
| KL01_053 | Razor     | Crescent-shape razor blade | Fragment | GPS  | 92      | 11,5   | Sup. Fig. 11:3  |
| KL01_054 | Torc      | Eylet end torded torc      | Fragment | GPS  | 60      | 6,5    | Sup. Fig. 11:1  |
| KL01_055 | Pin       | Nail-headed pin            | Fragment | GPS  | 14      | 6      | Sup. Fig. 11:2  |
| KL01_056 | Arrowhead | Socketed arrowhead         | Fragment | GPS  | 18      | 1      | Sup. Fig. 11:86 |
| KL01_057 | Arrowhead | Socketed arrowhead         | Complete | GPS  | 37      | 4,5    | Sup. Fig. 11:85 |
| KL01_058 | Arrowhead | Socketed arrowhead         | Complete | GPS  | 47      | 5,5    | Sup. Fig. 11:84 |
| KL01_059 | Arrowhead | Socketed arrowhead         | Complete | Site | 27,5    | 2      | Sup. Fig. 11:87 |
| KL01_060 | Sickle    | Sickle blade fragment      | Fragment | GPS  | 29      | 9      | Sup. Fig. 11:24 |
| KL01_061 | Sickle    | Sickle blade fragment      | Fragment | GPS  | 35      | 9      | Sup. Fig. 11:34 |
| KL01_062 | Axe       | Axe socket fragment        | Fragment | GPS  | 28,5    | 11     | Sup. Fig. 11:23 |
| KL01_063 | Axe       | Axe socket fragment        | Fragment | GPS  | 25      | 9      | Sup. Fig. 11:22 |
| KL01_064 | Axe       | Axe blade fragment         | Fragment | GPS  | 23      | 6      | Sup. Fig. 11:15 |
| KL01_065 | Axe       | Axe blade fragment         | Fragment | GPS  | 32,5    | 6,5    | Sup. Fig. 11:8  |
| KL01_066 | Knife     | Knife point fragment       | Fragment | GPS  | 25,5    | 4      | Sup. Fig. 11:16 |
| KL01_067 | Waste     | Casting Waste              | Raw mat. | GPS  | 24      | 5      | Sup. Fig. 11:73 |
| KL01_068 | Waste     | Casting Waste              | Raw mat. | GPS  | 27      | 4      | Sup. Fig. 11:75 |
| KL01_069 | Ingot     | Ingot                      | Raw mat. | GPS  | 55      | 111    | Sup. Fig. 11:33 |
| KL01_070 | Ingot     | Ingot                      | Raw mat. | GPS  | 56      | 52     | Sup. Fig. 11:44 |
| KL01_071 | Axe       | Axe socket fragment        | Fragment | GPS  | 30,5    | 4,5    | Sup. Fig. 11:25 |
| KL01_072 | Axe       | Body part of flanged axe   | Fragment | GPS  | 36,5    | 50     | Sup. Fig. 11:14 |
| KL01_073 | Sickle    | Sickle blade fragment      | Fragment | GPS  | 24      | 3,5    | Sup. Fig. 11:35 |
| KL01_074 | Ingot     | PC ingot fragment          | Raw mat. | GPS  | 29,5    | 35,5   | Sup. Fig. 11:45 |
| KL01_075 | Ingot     | PC ingot fragment          | Raw mat. | GPS  | 30      | 27,5   | Sup. Fig. 11:53 |
| KL01_076 | Ingot     | PC ingot fragment          | Raw mat. | GPS  | 42      | 25     | Sup. Fig. 11:52 |
| KL01_077 | Ingot     | PC ingot fragment          | Raw mat. | GPS  | 23,5    | 11     | Sup. Fig. 11:43 |
| KL01_078 | Ingot     | PC ingot fragment          | Raw mat. | GPS  | 34,5    | 62     | Sup. Fig. 11:54 |
| KL01_079 | Ingot     | PC ingot fragment          | Raw mat. | GPS  | 12      | 3,5    | Sup. Fig. 11:72 |
| KL01_080 | Droplet   | Amorphous droplet          | Raw mat. | GPS  | 26      | 4      | Sup. Fig. 11:71 |
| KL01_081 | Droplet   | Amorphous droplet          | Raw mat. | GPS  | 30      | 7      | Sup. Fig. 11:76 |
| KL01_082 | Droplet   | Amorphous droplet          | Raw mat. | GPS  | 29      | 7      | Sup. Fig. 11:64 |
| KL01_083 | Droplet   | Amorphous droplet          | Raw mat. | GPS  | 34      | 18     | Sup. Fig. 11:63 |
| KL01_084 | Ingot     | PC ingot fragment          | Raw mat. | GPS  | 34      | 9      | Sup. Fig. 11:65 |
| KL01_085 | Droplet   | Amorphous droplet          | Raw mat. | GPS  | 16,5    | 3,5    | Sup. Fig. 11:74 |
| KL01_086 | Droplet   | Amorphous droplet          | Raw mat. | GPS  | 20      | 3,5    | Sup. Fig. 11:77 |
| KL01_087 | Ring      | Cast ring                  | Complete | GPS  | 24      | 2,5    | Sup. Fig. 11:90 |

Tab. 1 (continued)

| Item     | Type        | Description             | Frag.    | GPS  | Max. d. | Weight | Fig.             |
|----------|-------------|-------------------------|----------|------|---------|--------|------------------|
| KL01_088 | Ring        | Cast ring               | Complete | GPS  | 26      | 2,5    | Sup. Fig. 11:91  |
| KL01_089 | Ring        | Cast ring               | Complete | GPS  | 16,5    | 1      | Sup. Fig. 11:80  |
| KL01_090 | Ring        | Cast ring               | Complete | GPS  | 15,5    | 1,5    | n/a              |
| KL01_091 | Ring        | Cast ring               | Complete | GPS  | 15      | 1      | Sup. Fig. 11:81  |
| KL01_092 | Ring        | Cast ring               | Complete | GPS  | 15      | 2      | Sup. Fig. 11:79  |
| KL01_093 | Ring        | Cast ring               | Complete | GPS  | 12      | 1      | Sup. Fig. 11:78  |
| KL02_001 | Dagger      | Dagger with oval back   | Complete | GPS  | 123     | 35     | Sup. Fig. 12:1   |
| KL02_002 | Ring        | Cast ring               | Complete | GPS  | 18      | 1,5    | Sup. Fig. 12:115 |
| KL02_003 | n/a         | Molten twisted wire     | Fragment | GPS  | 30      | 9      | Sup. Fig. 13:5   |
| KL02_004 | Ingot       | PC ingot fragment       | Raw mat. | GPS  | 34      | 21     | Sup. Fig. 13:21  |
| KL02_005 | Waste       | Pouring cup sprue       | Raw mat. | GPS  | 29      | 24     | Sup. Fig. 13:1   |
| KL02_006 | Axe         | Axe blade fragment      | Fragment | GPS  | 20      | 3      | Sup. Fig. 12:59  |
| KL02_007 | Arrowhead   | Socketed arrowhead      | Complete | GPS  | 16      | 3      | Sup. Fig. 12:67  |
| KL02_008 | Knife       | Knife handle fragment   | Fragment | GPS  | 28      | 3,5    | Sup. Fig. 12:66  |
| KL02_009 | Pin         | Stamp-headed pin        | Fragment | GPS  | 19      | 7,5    | Sup. Fig. 12:12  |
| KL02_010 | Ingot       | PC ingot fragment       | Raw mat. | GPS  | 38      | 102,5  | Sup. Fig. 13:22  |
| KL02_011 | Ingot       | PC ingot fragment       | Raw mat. | GPS  | 36      | 33     | Sup. Fig. 13:23  |
| KL02_012 | Ingot       | PC ingot fragment       | Raw mat. | GPS  | 30      | 25,5   | Sup. Fig. 13:24  |
| KL02_013 | Ingot       | PC ingot fragment       | Raw mat. | GPS  | 28      | 9      | Sup. Fig. 13:25  |
| KL02_014 | Droplet     | Amorphous droplet       | Raw mat. | GPS  | 18      | 7,5    | Sup. Fig. 13:63  |
| KL02_015 | Droplet     | Amorphous droplet       | Raw mat. | GPS  | 28      | 5,5    | Sup. Fig. 13:26  |
| KL02_016 | Ingot       | PC ingot fragment       | Raw mat. | GPS  | 29      | 35,5   | Sup. Fig. 13:27  |
| KL02_017 | Ingot       | PC ingot fragment       | Raw mat. | GPS  | 32      | 34,5   | Sup. Fig. 13:29  |
| KL02_018 | Ingot       | PC ingot fragment       | Raw mat. | GPS  | 30      | 21,5   | Sup. Fig. 13:30  |
| KL02_019 | Ingot       | PC ingot fragment       | Raw mat. | GPS  | 34      | 31,5   | Sup. Fig. 13:31  |
| KL02_020 | Ingot       | PC ingot fragment       | Raw mat. | GPS  | 28      | 22     | Sup. Fig. 13:32  |
| KL02_021 | Knife       | Knife point fragment    | Fragment | GPS  | 58      | 6,5    | Sup. Fig. 12:50  |
| KL02_022 | Droplet     | Amorphous droplet       | Raw mat. | Spot | 16      | 6      | Sup. Fig. 13:28  |
| KL02_023 | Droplet     | Amorphous droplet       | Raw mat. | Spot | 12      | 1      | Sup. Fig. 13:36  |
| KL02_024 | Droplet     | Amorphous droplet       | Raw mat. | Spot | 9       | 1      | Sup. Fig. 13:37  |
| KL02_025 | Droplet     | Amorphous droplet       | Raw mat. | Spot | 22      | 13,5   | Sup. Fig. 13:38  |
| KL02_026 | Droplet     | Amorphous droplet       | Raw mat. | Spot | 12      | 1,5    | Sup. Fig. 13:39  |
| KL02_027 | Ingot       | PC ingot fragment       | Raw mat. | GPS  | 24      | 22,5   | Sup. Fig. 13:40  |
| KL02_028 | Axe         | Axe blade fragment      | Fragment | GPS  | 26      | 3,5    | Sup. Fig. 12:39  |
| KL02_029 | n/a         | Tool fragment           | Fragment | GPS  | 38      | 11     | Sup. Fig. 12:41  |
| KL02_030 | Arrowhead   | Socketed arrowhead      | Complete | GPS  | 49      | 5      | Sup. Fig. 12:77  |
| KL02_031 | Arrowhead   | Socketed arrowhead      | Complete | GPS  | 31      | 3      | Sup. Fig. 12:68  |
| KL02_032 | Cap         | Eyelet cap              | Complete | GPS  | 15,5    | 1      | Sup. Fig. 12:85  |
| KL02_033 | Cap         | Eyelet cap              | Complete | Site | 25      | 2      | n/a              |
| KL02_034 | n/a         | Bronze sheet fragment   | Fragment | Site | 32      | 2      | Sup. Fig. 12:104 |
| KL02_035 | Ring        | Cast ring               | Complete | GPS  | 32      | 0,5    | Sup. Fig. 12:35  |
| KL02_036 | Ring        | Cast ring               | Complete | Site | 23      | 2      | Sup. Fig. 12:80  |
| KL02_037 | Ring        | Cast ring               | Complete | Site | 23      | 1      | Sup. Fig. 12:81  |
| KL02_038 | Ring        | Cast ring               | Complete | Site | 20      | 3      | Sup. Fig. 12:82  |
| KL02_039 | Ring        | Cast ring               | Complete | Site | 14      | 2,5    | Sup. Fig. 12:84  |
| KL02_040 | Ring        | Cast ring               | Complete | GPS  | 14      | 0,5    | Sup. Fig. 12:83  |
| KL02_041 | Pin         | Vase-headed pin         | Fragment | GPS  | 60      | 8,5    | Sup. Fig. 12:10  |
| KL02_042 | Arrowhead   | Socketed arrowhead      | Complete | GPS  | 40      | 4      | Sup. Fig. 12:78  |
| KL02_043 | Ingot       | PC ingot fragment       | Raw mat. | Site | 56      | 18     | Sup. Fig. 13:33  |
| KL02_044 | Knife       | Flange-handeled knife   | Fragment | Site | 48      | 14     | Sup. Fig. 12:54  |
| KL02_045 | Button      | Cast button with eyelet | Complete | Site | 19,5    | 6,5    | Sup. Fig. 12:18  |
| KL02_046 | Finger ring | Finger ring             | Complete | GPS  | 17,5    | 1,5    | Sup. Fig. 12:31  |
| KL02_047 | Pin         | Cup-headed pin          | Fragment | GPS  | 17      | 2,5    | Sup. Fig. 12:21  |
| KL02_048 | Bracelet    | Bracelet fragment       | Fragment | Site | 18,5    | 2      | Sup. Fig. 12:108 |
| KL02_049 | Chisel      | Rod chisel              | Complete | GPS  | 24      | 3,5    | Sup. Fig. 12:44  |
| KL02_050 | Knife       | Knife handle fragment   | Complete | GPS  | 30      | 5,5    | Sup. Fig. 12:53  |

Tab. 1 (continued)

| Item     | Type    | Description             | Frag.    | GPS  | Max. d. | Weight | Fig.             |
|----------|---------|-------------------------|----------|------|---------|--------|------------------|
| KL02_051 | n/a     | Sheet strip             | Complete | GPS  | 43      | 2,5    | Sup. Fig. 13:15  |
| KL02_052 | Axe     | Axe socket fragment     | Fragment | Site | 38      | 17     | Sup. Fig. 12:62  |
| KL02_053 | Sickle  | Sickle blade fragment   | Fragment | GPS  | 37      | 9,5    | Sup. Fig. 12:61  |
| KL02_054 | Waste   | Casting sprue           | Raw mat. | GPS  | 28      | 10     | Sup. Fig. 13:7   |
| KL02_055 | Waste   | Casting sprue           | Raw mat. | GPS  | 19,5    | 4      | Sup. Fig. 13:6   |
| KL02_056 | Chisel  | Rod chisel              | Complete | GPS  | 80      | 5      | Sup. Fig. 12:28  |
| KL02_057 | Hoard   | Hoard, 54 cast rings    | n/a      | GPS  |         | 54,5   | Sup. Fig. 13:99  |
| KL02_058 | Pin     | Onion-headed pin        | Fragment | GPS  | 35,5    | 14     | Sup. Fig. 12:2   |
| KL02_059 | Pin     | Pin needle              | Fragment | GPS  | 57      | 3      | Sup. Fig. 12:13  |
| KL02_060 | Knife   | Knife blade fragment    | Fragment | GPS  | 36,5    | 6      | Sup. Fig. 12:47  |
| KL02_061 | Axe     | Axe blade fragment      | Fragment | GPS  | 16      | 2      | Sup. Fig. 12:44  |
| KL02_062 | Axe     | Axe blade fragment      | Fragment | GPS  | 36,5    | 2      | Sup. Fig. 12:51  |
| KL02_063 | Knife   | Full-handled knife      | Fragment | GPS  | 22,5    | 4,5    | Sup. Fig. 12:48  |
| KL02_064 | Dagger  | Dagger point fragment   | Fragment | GPS  | 19,5    | 2,5    | Sup. Fig. 12:25  |
| KL02_065 | Knife   | Knife point fragment    | Fragment | GPS  | 15      | 0,2    | Sup. Fig. 12:56  |
| KL02_066 | Chisel  | Rod chisel              | Fragment | GPS  | 23,5    | 2      | Sup. Fig. 12:36  |
| KL02_067 | Chisel  | Rod chisel              | Fragment | GPS  | 27      | 2,5    | Sup. Fig. 12:37  |
| KL02_068 | n/a     | Rod fragment            | Fragment | GPS  | 13      | 2      | Sup. Fig. 13:3   |
| KL02_069 | n/a     | Ornamented sheet bronze | Fragment | GPS  | 33      | 2      | Sup. Fig. 12:20  |
| KL02_070 | n/a     | Sheet strip             | Complete | GPS  | 34      | 2,5    | Sup. Fig. 13:16  |
| KL02_071 | n/a     | Rod fragment            | Fragment | GPS  | 20      | 8,5    | Sup. Fig. 12:33  |
| KL02_072 | Waste   | Unidentifiable item     | Raw mat. | GPS  | 19      | 2      | Sup. Fig. 13:2   |
| KL02_073 | Chisel  | Rod chisel              | Complete | GPS  | 47      | 5      | Sup. Fig. 12:27  |
| KL02_074 | Ring    | Cast rings              | Complete | GPS  | 30      | 9      | Sup. Fig. 12:100 |
| KL02_075 | Ring    | Cast ring               | Complete | GPS  | 14      | 0,3    | Sup. Fig. 12:95  |
| KL02_076 | Ring    | Cast ring               | Complete | GPS  | 14      | 0,3    | Sup. Fig. 12:97  |
| KL02_077 | Ring    | Cast ring               | Complete | GPS  | 15,5    | 1,5    | Sup. Fig. 12:98  |
| KL02_078 | Ring    | Cast ring               | Complete | GPS  | 16      | 1,5    | Sup. Fig. 12:101 |
| KL02_079 | Ring    | Cast ring               | Complete | GPS  | 15      | 1      | Sup. Fig. 12:96  |
| KL02_080 | Ring    | Cast ring               | Complete | GPS  | 15      | 1      | Sup. Fig. 12:99  |
| KL02_081 | Ring    | Cast ring               | Complete | GPS  | 13,5    | 0,2    | Sup. Fig. 12:102 |
| KL02_082 | Ring    | Cast ring               | Complete | GPS  | 25      | 1,5    | Sup. Fig. 12:94  |
| KL02_083 | Ingot   | Complete ingot          | Raw mat. | GPS  | 30      | 55,5   | Sup. Fig. 13:20  |
| KL02_084 | Ingot   | PC ingot fragment       | Raw mat. | GPS  | 36      | 25     | Sup. Fig. 13:19  |
| KL02_085 | Ingot   | PC ingot fragment       | Raw mat. | GPS  | 36,5    | 16,5   | Sup. Fig. 13:59  |
| KL02_086 | Ingot   | PC ingot fragment       | Raw mat. | GPS  | 27      | 9      | n/a              |
| KL02_087 | Ingot   | PC ingot fragment       | Raw mat. | GPS  | 34,5    | 14,5   | n/a              |
| KL02_088 | Ingot   | PC ingot fragment       | Raw mat. | GPS  | 25      | 55     | n/a              |
| KL02_089 | Ingot   | PC ingot fragment       | Raw mat. | GPS  | 23,5    | 5,5    | n/a              |
| KL02_090 | Waste   | Casting sprue           | Raw mat. | GPS  | 17      | 3,5    | Sup. Fig. 13:59  |
| KL02_091 | Droplet | Amorphous droplet       | Raw mat. | GPS  | 22,5    | 4      | n/a              |
| KL02_092 | Droplet | Amorphous droplet       | Raw mat. | GPS  | 18      | 6,5    | Sup. Fig. 13:60  |
| KL02_093 | Ingot   | Ingot                   | Raw mat. | GPS  | 28      | 14,5   | Sup. Fig. 13:68  |
| KL02_094 | n/a     | Unidentifiable fragment | Fragment | GPS  | 25      | 8,5    | Sup. Fig. 13:69  |
| KL02_095 | Droplet | Amorphous droplet       | Raw mat. | GPS  | 32      | 22,5   | Sup. Fig. 13:70  |
| KL02_096 | Droplet | Amorphous droplet       | Raw mat. | GPS  | 28,5    | 10,5   | Sup. Fig. 13:78  |
| KL02_097 | Droplet | Amorphous droplet       | Raw mat. | GPS  | 15      | 4      | Sup. Fig. 13:67  |
| KL02_098 | Droplet | Amorphous droplet       | Raw mat. | GPS  | 25      | 5,5    | Sup. Fig. 13:72  |
| KL02_099 | Droplet | Amorphous droplet       | Raw mat. | GPS  | 19      | 4,5    | Sup. Fig. 13:61  |
| KL02_100 | Droplet | Amorphous droplet       | Raw mat. | GPS  | 18,5    | 3,7    | Sup. Fig. 13:62  |
| KL02_101 | Waste   | Pouring cup sprue       | Raw mat. | GPS  | 19,5    | 8,5    | Sup. Fig. 13:18  |
| KL02_102 | Droplet | Amorphous droplet       | Raw mat. | GPS  | 20      | 6      | Sup. Fig. 13:66  |
| KL02_103 | Droplet | Amorphous droplet       | Raw mat. | GPS  | 17,5    | 1,5    | Sup. Fig. 13:82  |
| KL02_104 | Droplet | Amorphous droplet       | Raw mat. | GPS  | 11      | 2      | Sup. Fig. 13:83  |
| KL02_105 | Droplet | Amorphous droplet       | Raw mat. | GPS  | 9       | 0,7    | Sup. Fig. 13:74  |
| KL02_106 | Droplet | Amorphous droplet       | Raw mat. | GPS  | 13      | 2      | Sup. Fig. 13:86  |



Tab. 1 (continued)

| Item     | Type      | Description                   | Frag.    | GPS  | Max. d. | Weight | Fig.             |
|----------|-----------|-------------------------------|----------|------|---------|--------|------------------|
| KL02_107 | Droplet   | Amorphous droplet             | Raw mat. | GPS  | 18      | 3      | Sup. Fig. 13:75  |
| KL02_108 | Droplet   | Amorphous droplet             | Raw mat. | GPS  | 13      | 2      | Sup. Fig. 13:79  |
| KL02_109 | Droplet   | Amorphous droplet             | Raw mat. | GPS  | 19      | 1      | Sup. Fig. 13:80  |
| KL02_110 | Droplet   | Amorphous droplet             | Raw mat. | GPS  | 12      | 2      | Sup. Fig. 13:76  |
| KL02_111 | Droplet   | Amorphous droplet             | Raw mat. | GPS  | 11      | 1      | Sup. Fig. 13:77  |
| KL02_112 | Pin       | Vase-headed pin               | Fragment | GPS  | 32      | 5,5    | Sup. Fig. 12:3   |
| KL02_113 | Ornament  | Biconical-headed pin          | Fragment | Spot | 13,5    | 4      | Sup. Fig. 12:9   |
| KL02_114 | Pin       | Globular-headed pin           | Complete | Site | 75      | 8      | Sup. Fig. 12:4   |
| KL02_115 | Ornament  | Biconical-headed pin          | Fragment | GPS  | 10,5    | 2      | Sup. Fig. 12:8   |
| KL02_116 | Ornament  | Biconical-headed pin          | Fragment | GPS  | 20      | 3,5    | Sup. Fig. 12:6   |
| KL02_117 | Ornament  | Onion-headed pin              | Fragment | GPS  | 21      | 6,5    | Sup. Fig. 12:7   |
| KL02_118 | Pin       | Onion-headed pin              | Fragment | GPS  | 22      | 3      | Sup. Fig. 12:5   |
| KL02_119 | Ornament  | Pin?                          | Fragment | GPS  | 54      | 5,5    | Sup. Fig. 12:11  |
| KL02_120 | Hoard     | Hoard, 21 cast rings          | n/a      | GPS  |         | 16     | Sup. Fig. 13:100 |
| KL02_121 | Bracelet  | Convex-concave prof. bracelet | Fragment | GPS  | 18,5    | 4,5    | Sup. Fig. 12:14  |
| KL02_122 | Ornament  | Plano-convex prof. bracelet   | Fragment | GPS  | 57      | 27     | Sup. Fig. 12:15  |
| KL02_123 | Ornament  | Square-prof. bracelet         | Fragment | Site | 36      | 2,5    | Sup. Fig. 12:17  |
| KL02_124 | n/a       | Unidentifiable item           | Fragment | GPS  | 21,5    | 1      | Sup. Fig. 12:16  |
| KL02_125 | Sickle    | Tanged sickle frag.           | Fragment | GPS  | 41      | 8      | Sup. Fig. 12:55  |
| KL02_126 | Knife     | Knife point fragment          | Fragment | GPS  | 18      | 1,5    | Sup. Fig. 12:23  |
| KL02_127 | Axe       | Axe blade fragment            | Fragment | GPS  | 20      | 1      | Sup. Fig. 13:4   |
| KL02_128 | Knife     | Knife point fragment          | Fragment | GPS  | 51      | 7,5    | Sup. Fig. 12:57  |
| KL02_129 | Knife     | Knife point fragment          | Fragment | GPS  | 44,5    | 4,5    | Sup. Fig. 12:58  |
| KL02_130 | Core      | Arrowhead casting core        | Complete | GPS  | 42      | 8,5    | Sup. Fig. 12:116 |
| KL02_131 | Chisel    | Chisel                        | Fragment | GPS  | 16      | 4      | Sup. Fig. 12:35  |
| KL02_132 | Axe       | Axe blade fragment            | Fragment | GPS  | 45      | 25,5   | Sup. Fig. 12:52  |
| KL02_133 | Ornament  | Sheet-bronze ornament         | Complete | GPS  | 29,5    | 0,1    | Sup. Fig. 12:22  |
| KL02_134 | Knife     | Mandrel-handled knife         | Fragment | GPS  | 72      | 22,5   | Sup. Fig. 12:46  |
| KL02_135 | Knife     | Mandrel-handled knife         | Fragment | GPS  | 47,5    | 11     | Sup. Fig. 12:49  |
| KL02_136 | Axe       | Axe blade fragment            | Fragment | GPS  | 14      | 1,5    | Sup. Fig. 12:43  |
| KL02_137 | Sickle    | Sickle blade fragment         | Fragment | GPS  | 25      | 4,5    | Sup. Fig. 12:60  |
| KL02_138 | Chisel    | Chisel                        | Fragment | GPS  | 16      | 3      | Sup. Fig. 12:32  |
| KL02_139 | Chisel    | Rod chisel                    | Fragment | GPS  | 72      | 1,5    | Sup. Fig. 12:38  |
| KL02_140 | Chisel    | Rod chisel                    | Fragment | GPS  | 27      | 1,5    | Sup. Fig. 12:29  |
| KL02_141 | Chisel    | Rod chisel                    | Fragment | GPS  | 29      | 1,5    | Sup. Fig. 12:40  |
| KL02_142 | n/a       | Rod with eyelet               | Fragment | GPS  | 14      | 1      | n/a              |
| KL02_143 | Arrowhead | Socketed arrowhead            | Complete | GPS  | 31,5    | 3      | Sup. Fig. 12:70  |
| KL02_144 | Arrowhead | Socketed arrowhead            | Complete | GPS  | 30      | 3      | Sup. Fig. 12:71  |
| KL02_145 | Arrowhead | Socketed arrowhead            | Complete | GPS  | 38      | 3,5    | Sup. Fig. 12:72  |
| KL02_146 | Arrowhead | Socketed arrowhead            | Complete | GPS  | 44      | 4,5    | Sup. Fig. 12:73  |
| KL02_147 | Arrowhead | Socketed arrowhead            | Complete | Site | 33      | 3      | Sup. Fig. 12:74  |
| KL02_148 | Arrowhead | Socketed arrowhead            | Complete | GPS  | 32,5    | 2,5    | Sup. Fig. 12:64  |
| KL02_149 | Arrowhead | Socketed arrowhead            | Complete | GPS  | 24,5    | 1      | Sup. Fig. 12:75  |
| KL02_150 | Arrowhead | Socketed arrowhead            | Complete | Spot | 33      | 3      | Sup. Fig. 12:76  |
| KL02_151 | n/a       | Ornamented wire               | Fragment | GPS  | 37      | 5      | Sup. Fig. 12:19  |
| KL02_152 | Arrowhead | Socketed arrowhead            | Complete | GPS  | 51      | 5      | Sup. Fig. 12:69  |
| KL02_153 | Arrowhead | Socketed arrowhead            | Fragment | GPS  | 28      | 2      | Sup. Fig. 12:63  |
| KL02_154 | Arrowhead | Mandrel arrowhead             | Complete | GPS  | 38      | 3      | Sup. Fig. 12:65  |
| KL02_155 | Spear     | Spear point fragment          | Fragment | GPS  | 41      | 6,5    | Sup. Fig. 12:24  |
| KL02_156 | Waste     | Unidentifiable cast fragment  | Raw mat. | GPS  | 39      | 2,5    | Sup. Fig. 13:11  |
| KL02_157 | Waste     | Unidentifiable cast fragment  | Raw mat. | GPS  | 24,5    | 3      | n/a              |
| KL02_158 | Droplet   | Unidentifiable cast fragment  | Raw mat. | GPS  | 19      | 5      | Sup. Fig. 13:12  |
| KL02_159 | Cap       | Sheet cap with eyelet         | Complete | GPS  | 18      | 1,5    | Sup. Fig. 12:103 |
| KL02_160 | Cap       | Sheet cap with eyelet         | Complete | GPS  | 13,5    | 1      | Sup. Fig. 12:88  |
| KL02_161 | Cap       | Sheet cap with eyelet         | Complete | GPS  | 11,5    | 0,5    | Sup. Fig. 12:87  |
| KL02_162 | Cap       | Sheet cap with eyelet         | Complete | GPS  | 12      | 0,5    | Sup. Fig. 12:86  |

Tab. 1 (continued)

| Item     | Type      | Description                  | Frag.    | GPS  | Max. d. | Weight | Fig.             |
|----------|-----------|------------------------------|----------|------|---------|--------|------------------|
| KL02_163 | Cap       | Large sheet cap              | Fragment | GPS  | 30      | 2,5    | Sup. Fig. 12:105 |
| KL02_164 | Knife     | Knife handle fragment        | Fragment | GPS  | 34,5    | 5      | Sup. Fig. 12:45  |
| KL02_165 | Ring      | Cast ring                    | Complete | GPS  | 24,5    | 1,5    | Sup. Fig. 12:107 |
| KL02_166 | Ring      | Cast ring                    | Complete | GPS  | 23      | 2,5    | Sup. Fig. 12:89  |
| KL02_167 | Ring      | Cast ring                    | Complete | GPS  | 19      | 3      | Sup. Fig. 12:91  |
| KL02_168 | Ring      | Cast ring                    | Complete | GPS  | 18      | 1,5    | n/a              |
| KL02_169 | Ring      | Cast ring                    | Complete | GPS  | 15      | 1      | n/a              |
| KL02_170 | Ring      | Cast ring                    | Complete | GPS  | 14,5    | 0,5    | Sup. Fig. 12:90  |
| KL02_171 | Ring      | Cast ring                    | Complete | Spot | 16      | 1,5    | Sup. Fig. 12:109 |
| KL02_172 | Ring      | Cast ring                    | Complete | GPS  | 15,5    | 0,5    | n/a              |
| KL02_173 | Ring      | Cast ring                    | Complete | GPS  | 16      | 1      | Sup. Fig. 12:106 |
| KL02_174 | Ring      | Cast ring                    | Complete | GPS  | 11,5    | 0,5    | Sup. Fig. 12:114 |
| KL02_175 | Ring      | Cast ring                    | Complete | GPS  | 15      | 1      | Sup. Fig. 12:110 |
| KL02_176 | Ring      | Cast ring                    | Complete | GPS  | 17      | 1,5    | Sup. Fig. 12:93  |
| KL02_177 | Ring      | Cast ring                    | Complete | GPS  | 16      | 1      | Sup. Fig. 12:92  |
| KL02_178 | Ring      | Cast ring                    | Complete | Spot | 16      | 1      | Sup. Fig. 12:111 |
| KL02_179 | Ring      | Cast ring                    | Complete | GPS  | 15,5    | 0,5    | Sup. Fig. 12:112 |
| KL02_180 | Ring      | Cast ring                    | Complete | Spot | 15      | 1      | Sup. Fig. 12:113 |
| KL02_181 | Waste     | Unidentifiable cast fragment | Raw mat. | GPS  | 33      | 4,5    | Sup. Fig. 13:14  |
| KL02_182 | Waste     | Unidentifiable cast fragment | Raw mat. | Site | 21,5    | 5      | Sup. Fig. 13:8   |
| KL02_183 | Waste     | Unidentifiable cast fragment | Raw mat. | GPS  | 10,5    | 1,5    | Sup. Fig. 13:13  |
| KL02_184 | Waste     | Axe miscast fragment         | Raw mat. | GPS  | 20      | 5      | Sup. Fig. 13:9   |
| KL02_185 | Droplet   | Amorphous droplet            | Raw mat. | GPS  | 17      | 4,5    | Sup. Fig. 13:45  |
| KL02_186 | Ingot     | PC ingot fragment            | Raw mat. | GPS  | 22      | 7,5    | Sup. Fig. 13:46  |
| KL02_187 | Droplet   | Amorphous droplet            | Raw mat. | GPS  | 18      | 5,5    | Sup. Fig. 13:47  |
| KL02_188 | Droplet   | Amorphous droplet            | Raw mat. | GPS  | 15,5    | 2,5    | Sup. Fig. 13:48  |
| KL02_189 | Droplet   | Amorphous droplet            | Raw mat. | GPS  | 40      | 14     | Sup. Fig. 13:35  |
| KL02_190 | Ingot     | PC ingot fragment            | Raw mat. | GPS  | 32      | 13,5   | Sup. Fig. 13:44  |
| KL02_191 | Ingot     | PC ingot fragment            | Raw mat. | GPS  | 41      | 38     | Sup. Fig. 13:42  |
| KL02_192 | Ingot     | PC ingot fragment            | Raw mat. | GPS  | 24      | 21,5   | Sup. Fig. 13:43  |
| KL02_193 | Droplet   | Amorphous droplet            | Raw mat. | GPS  | 36      | 10     | Sup. Fig. 13:49  |
| KL02_194 | Ingot     | PC ingot fragment            | Raw mat. | GPS  | 20      | 9,5    | Sup. Fig. 13:58  |
| KL02_195 | Ingot     | PC ingot fragment            | Raw mat. | GPS  | 21      | 9,5    | Sup. Fig. 13:56  |
| KL02_196 | Ingot     | PC ingot fragment            | Raw mat. | GPS  | 29      | 19     | Sup. Fig. 13:57  |
| KL02_197 | Droplet   | Amorphous droplet            | Raw mat. | GPS  | 17      | 5      | Sup. Fig. 13:54  |
| KL02_198 | Droplet   | Amorphous droplet            | Raw mat. | GPS  | 19      | 4      | Sup. Fig. 13:55  |
| KL02_199 | Ingot     | PC ingot fragment            | Raw mat. | GPS  | 42      | 20     | Sup. Fig. 13:41  |
| KL02_200 | Ingot     | PC ingot fragment            | Raw mat. | GPS  | 43      | 74,5   | Sup. Fig. 13:34  |
| KL02_202 | Droplet   | Amorphous droplet            | Raw mat. | GPS  | 20,5    | 2,5    | Sup. Fig. 13:71  |
| KL02_203 | Droplet   | Amorphous droplet            | Raw mat. | GPS  | 12,5    | 1,5    | Sup. Fig. 13:85  |
| KL02_204 | Droplet   | Amorphous droplet            | Raw mat. | GPS  | 22,5    | 3      | Sup. Fig. 13:84  |
| KL02_205 | Droplet   | Amorphous droplet            | Raw mat. | GPS  | 20,5    | 6      | Sup. Fig. 13:95  |
| KL02_206 | Droplet   | Amorphous droplet            | Raw mat. | Spot | 25      | 10,5   | Sup. Fig. 13:81  |
| KL02_207 | Droplet   | Amorphous droplet            | Raw mat. | Spot | 14,5    | 2      | Sup. Fig. 13:89  |
| KL02_208 | Ingot     | PC ingot fragment            | Raw mat. | Spot | 11,5    | 1,5    | Sup. Fig. 13:98  |
| KL02_209 | Droplet   | Amorphous droplet            | Raw mat. | GPS  | 37      | 16     | Sup. Fig. 13:96  |
| KL02_210 | Ingot     | PC ingot fragment            | Raw mat. | GPS  | 30      | 36     | Sup. Fig. 13:92  |
| KL02_211 | Droplet   | Amorphous droplet            | Raw mat. | GPS  | 42,5    | 31,5   | Sup. Fig. 13:91  |
| KL02_212 | Droplet   | Amorphous droplet            | Raw mat. | GPS  | 30,5    | 18     | Sup. Fig. 13:94  |
| KL02_213 | Ingot     | PC ingot fragment            | Raw mat. | GPS  | 28,5    | 12     | Sup. Fig. 13:97  |
| KL02_214 | Ingot     | PC ingot fragment            | Raw mat. | Spot | 26      | 16,5   | Sup. Fig. 13:93  |
| KL02_215 | Droplet   | Amorphous droplet            | Raw mat. | GPS  | 19,5    | 5      | Sup. Fig. 13:90  |
| KL02_216 | Ingot     | PC ingot fragment            | Raw mat. | GPS  | 20,5    | 9      | Sup. Fig. 13:87  |
| KL02_217 | Droplet   | Amorphous droplet            | Raw mat. | GPS  | 14      | 4,5    | Sup. Fig. 13:73  |
| KL03_001 | Arrowhead | Socketed arrowhead           | Complete | GPS  | 41      | 5      | Sup. Fig. 14:64  |
| KL03_002 | Cap       | Eylet cap                    | Complete | GPS  | 20,5    | 2,5    | Sup. Fig. 14:72  |

Tab. 1 (continued)

| Item     | Type      | Description                  | Frag.    | GPS  | Max. d. | Weight | Fig.              |
|----------|-----------|------------------------------|----------|------|---------|--------|-------------------|
| KL03_003 | Axe       | Axe blade fragment           | Fragment | GPS  | 14      | 2      | Sup. Fig. 14.47   |
| KL03_004 | Sickle    | Sickle blade fragment        | Fragment | GPS  | 23      | 2      | Sup. Fig. 14.49   |
| KL03_005 | Pin       | Klentnice type pin           | Complete | GPS  | 80      | 6,5    | Sup. Fig. 14.1    |
| KL03_006 | Ingot     | PC ingot fragment            | Raw mat. | GPS  | 34      | 31     | Sup. Fig. 14.84   |
| KL03_007 | Ingot     | PC ingot fragment            | Raw mat. | GPS  | 23      | 9      | Sup. Fig. 14.85   |
| KL03_008 | Waste     | Unidentifiable casting waste | Fragment | GPS  | 26      | 3,5    | Sup. Fig. 15.a.16 |
| KL03_009 | Ingot     | PC ingot fragment            | Raw mat. | GPS  | 16      | 2      | Sup. Fig. 14.83   |
| KL03_010 | Droplet   | Amorphous droplet            | Raw mat. | GPS  | 37      | 10,5   | Sup. Fig. 14.107  |
| KL03_011 | Ingot     | PC ingot fragment            | Raw mat. | GPS  | 23      | 8      | Sup. Fig. 14.108  |
| KL03_012 | Ingot     | PC ingot fragment            | Raw mat. | GPS  | 29      | 18,5   | Sup. Fig. 14.109  |
| KL03_013 | Droplet   | Amorphous droplet            | Raw mat. | GPS  | 24      | 10     | Sup. Fig. 14.110  |
| KL03_014 | Droplet   | Amorphous droplet            | Raw mat. | GPS  | 21      | 3,5    | Sup. Fig. 14.111  |
| KL03_015 | Droplet   | Amorphous droplet            | Raw mat. | GPS  | 32      | 9,5    | Sup. Fig. 14.119  |
| KL03_016 | Droplet   | Amorphous droplet            | Raw mat. | GPS  | 20      | 6,5    | Sup. Fig. 14.120  |
| KL03_017 | Ingot     | PC ingot fragment            | Raw mat. | GPS  | 29      | 3,5    | Sup. Fig. 14.121  |
| KL03_018 | Droplet   | Amorphous droplet            | Raw mat. | GPS  | 22      | 7      | Sup. Fig. 14.122  |
| KL03_019 | Droplet   | Amorphous droplet            | Raw mat. | GPS  | 24      | 9,5    | Sup. Fig. 14.123  |
| KL03_021 | Droplet   | Amorphous droplet            | Raw mat. | GPS  | 28      | 14,5   | Sup. Fig. 14.134  |
| KL03_022 | Ingot     | PC ingot fragment            | Raw mat. | GPS  | 26      | 16     | Sup. Fig. 14.135  |
| KL03_023 | Ingot     | PC ingot fragment            | Raw mat. | GPS  | 45,5    | 45,5   | Sup. Fig. 14.131  |
| KL03_024 | Ingot     | Ingot                        | Raw mat. | Spot | 44      | 43,5   | Sup. Fig. 14.132  |
| KL03_025 | Ingot     | PC ingot fragment            | Raw mat. | Spot | 38      | 30     | Sup. Fig. 14.141  |
| KL03_026 | Ingot     | PC ingot fragment            | Raw mat. | Spot | 44      | 85,5   | Sup. Fig. 14.142  |
| KL03_027 | Droplet   | Amorphous droplet            | Raw mat. | Spot | 33      | 7      | Sup. Fig. 14.145  |
| KL03_028 | Ingot     | PC ingot fragment            | Raw mat. | Spot | 22,5    | 11     | Sup. Fig. 14.146  |
| KL03_029 | Droplet   | Amorphous droplet            | Raw mat. | Spot | 14      | 2,5    | Sup. Fig. 14.150  |
| KL03_030 | Droplet   | Amorphous droplet            | Raw mat. | Spot | 20      | 4      | Sup. Fig. 14.151  |
| KL03_031 | Droplet   | Amorphous droplet            | Raw mat. | Spot | 22,5    | 9      | Sup. Fig. 14.152  |
| KL03_032 | Ingot     | PC ingot fragment            | Raw mat. | Spot | 17      | 2,5    | Sup. Fig. 14.46   |
| KL03_033 | Ingot     | PC ingot fragment            | Raw mat. | Spot | 24,5    | 20,5   | Sup. Fig. 14.147  |
| KL03_034 | Ornament  | Oval profile bracelet        | Fragment | Spot | 17      | 3      | Sup. Fig. 15.a.13 |
| KL03_035 | Axe       | Axe blade fragment           | Fragment | Spot | 17      | 1,5    | Sup. Fig. 14.36   |
| KL03_036 | Droplet   | Amorphous droplet            | Raw mat. | Spot | 12      | 0,5    | Sup. Fig. 14.155  |
| KL03_037 | Sickle    | Sickle point fragment        | Fragment | Spot | 21      | 9      | Sup. Fig. 14.59   |
| KL03_038 | Waste     | Casting sprue                | Raw mat. | Spot | 21      | 5      | Sup. Fig. 15.a.12 |
| KL03_039 | Waste     | Casting sprue                | Raw mat. | Spot | 30      | 9      | Sup. Fig. 15.a.14 |
| KL03_040 | Pin       | Vase-headed pin              | Complete | GPS  | 75      | 7,5    | Sup. Fig. 14.2    |
| KL03_041 | Arrowhead | Socketed arrowhead           | Complete | GPS  | 33      | 3,5    | Sup. Fig. 14.60   |
| KL03_042 | Arrowhead | Socketed arrowhead           | Fragment | GPS  | 24      | 3      | Sup. Fig. 14.62   |
| KL03_043 | Arrowhead | Sheet arrowhead              | Complete | GPS  | 32      | 2      | Sup. Fig. 14.61   |
| KL03_044 | Sickle    | Sickle point fragment        | Fragment | GPS  | 40      | 12     | Sup. Fig. 14.57   |
| KL03_045 | Ring      | Cast ring                    | Complete | GPS  | 24,5    | 1      | Sup. Fig. 14.103  |
| KL03_046 | Waste     | unidentifiable casting waste | Raw mat. | GPS  | 27,5    | 4      | Sup. Fig. 15.a.11 |
| KL03_047 | Ingot     | Ingot                        | Raw mat. | GPS  | 85,5    | 229    | Sup. Fig. 14.159  |
| KL03_048 | Droplet   | Amorphous Amorphous droplet  | Raw mat. | GPS  | 23      | 5,5    | Sup. Fig. 14.80   |
| KL03_049 | Droplet   | Amorphous Amorphous droplet  | Raw mat. | GPS  | 20      | 4,5    | Sup. Fig. 14.81   |
| KL03_050 | Droplet   | Amorphous Amorphous droplet  | Raw mat. | GPS  | 13      | 1,5    | Sup. Fig. 14.82   |
| KL03_051 | Bracelet  | Plano-convex prof. bracelet  | Fragment | GPS  | 48      | 13     | Sup. Fig. 14.15   |
| KL03_052 | Bracelet  | Oval profile bracelet        | Fragment | GPS  | 31      | 15,5   | n/a               |
| KL03_053 | Ring      | Cast oval ring               | Complete | GPS  | 25      | 5,5    | Sup. Fig. 14.91   |
| KL03_054 | Ring      | Cast ring                    | Complete | GPS  | 11      | 1      | Sup. Fig. 14.93   |
| KL03_055 | Ring      | Cast ring                    | Complete | GPS  | 14      | 0,5    | Sup. Fig. 14.96   |
| KL03_056 | Arrowhead | Socketed arrowhead           | Complete | Spot | 29      | 2,5    | Sup. Fig. 14.63   |
| KL03_057 | Hook      | Fishing hook                 | Complete | Spot | 39      | 3,5    | Sup. Fig. 14.41   |
| KL03_058 | Pin       | Pin needle                   | Fragment | Spot | 75      | 2,5    | Sup. Fig. 14.13   |
| KL03_059 | Ring      | Cast ring                    | Complete | Spot | 17      | 0,5    | Sup. Fig. 14.98   |

Tab. 1 (continued)

| Item     | Type      | Description                  | Frag.    | GPS  | Max. d. | Weight | Fig.              |
|----------|-----------|------------------------------|----------|------|---------|--------|-------------------|
| KL03_060 | Ring      | Cast ring                    | Complete | Spot | 13      | 0,5    | Sup. Fig. 14.99   |
| KL03_061 | Arrowhead | Socketed arrowhead           | Complete | Spot | 40      | 4,5    | Sup. Fig. 14.76   |
| KL03_062 | n/a       | Unidentifiable casting waste | Fragment | Spot | 19      | 5      | Sup. Fig. 15.a.9  |
| KL03_063 | Droplet   | Amorphous droplet            | Raw mat. | Spot | 13      | 2,5    | Sup. Fig. 14.154  |
| KL03_064 | Arrowhead | Socketed arrowhead           | Complete | Spot | 46      | 6      | Sup. Fig. 14.56   |
| KL03_065 | Arrowhead | Socketed arrowhead           | Complete | Spot | 32      | 3      | Sup. Fig. 14.65   |
| KL03_066 | Chisel    | Square-prof.rod chisel       | Fragment | Spot | 52      | 12     | Sup. Fig. 14.27   |
| KL03_067 | Pin       | Cup-headed pin               | Fragment | Spot | 22      | 3      | Sup. Fig. 14.14   |
| KL03_068 | Cap       | Eylet cap                    | Complete | Spot | 16      | 1      | Sup. Fig. 14.72   |
| KL03_069 | Cap       | Eylet cap                    | Complete | Spot | 14      | 1      | Sup. Fig. 14.73   |
| KL03_070 | Cap       | Eylet cap                    | Complete | Spot | 11      | 1      | Sup. Fig. 14.74   |
| KL03_071 | Cap       | Eylet cap                    | Complete | Spot | 15      | 1,5    | Sup. Fig. 14.70   |
| KL03_072 | Stud      | Cast stud                    | Complete | Spot | 15      | 3      | Sup. Fig. 14.43   |
| KL03_073 | Ring      | Cast ring                    | Complete | Spot | 21      | 2      | Sup. Fig. 14.90   |
| KL03_074 | Ring      | Cast ring                    | Complete | Spot | 14      | 0,5    | Sup. Fig. 14.92   |
| KL03_075 | Ring      | Cast ring                    | Complete | Spot | 14      | 0,5    | Sup. Fig. 14.94   |
| KL03_076 | Ring      | Cast ring                    | Complete | Spot | 13      | 0,5    | Sup. Fig. 14.102  |
| KL03_077 | Knife     | Knife point fragment         | Fragment | Spot | 45      | 4,5    | Sup. Fig. 14.24   |
| KL03_078 | Axe       | Axe blade fragment           | Fragment | Spot | 45      | 4,5    | Sup. Fig. 14.48   |
| KL03_079 | Axe       | Axe blade fragment           | Fragment | Spot | 18      | 3      | Sup. Fig. 14.37   |
| KL03_080 | Waste     | Pouring cup sprue            | Raw mat. | Spot | 38      | 14,5   | Sup. Fig. 15.a.15 |
| KL03_081 | Ingot     | PC ingot fragment            | Raw mat. | Spot | 35      | 13,5   | Sup. Fig. 15.a.3  |
| KL03_082 | Ingot     | PC ingot fragment            | Raw mat. | Spot | 26      | 13,5   | Sup. Fig. 15.a.4  |
| KL03_083 | Ingot     | PC ingot fragment            | Raw mat. | Spot | 22      | 9,5    | Sup. Fig. 14.160  |
| KL03_084 | Ingot     | PC ingot fragment            | Raw mat. | Spot | 22      | 6,5    | Sup. Fig. 14.153  |
| KL03_085 | Droplet   | Amorphous droplet            | Raw mat. | Spot | 34      | 19,5   | Sup. Fig. 14.149  |
| KL03_086 | Droplet   | Amorphous droplet            | Raw mat. | Spot | 25      | 4      | Sup. Fig. 14.158  |
| KL03_087 | n/a       | Unidentifiable item          | Fragment | Spot | 19      | 4      | Sup. Fig. 14.19   |
| KL03_088 | n/a       | Needle/wire fragment         | Fragment | Spot | 15      | 1      | Sup. Fig. 14.20   |
| KL03_089 | n/a       | Sheet fragment               | Fragment | Spot | 30      | 1,5    | Sup. Fig. 14.54   |
| KL03_090 | n/a       | Sheet fragment               | Fragment | Spot | 19      | 1      | Sup. Fig. 14.52   |
| KL03_091 | n/a       | Unidentifiable item          | Fragment | Spot | 17      | 1,5    | Sup. Fig. 15.a.10 |
| KL03_092 | Ring      | Cast ring                    | Complete | Spot | 11      | 1      | Sup. Fig. 14.97   |
| KL03_093 | Ring      | Cast ring                    | Complete | Spot | 15      | 1      | Sup. Fig. 14.95   |
| KL03_094 | Knife     | Knife point fragment         | Fragment | Spot | 27      | 1,5    | Sup. Fig. 14.50   |
| KL03_095 | n/a       | Wire fragment                | Fragment | Spot | 32      | 4      | Sup. Fig. 14.51   |
| KL03_096 | Waste     | Casting sprue                | Raw mat. | Spot | 12      | 1,5    | Sup. Fig. 15.a.7  |
| KL03_097 | Ingot     | PC ingot fragment            | Raw mat. | Spot | 36      | 33,5   | Sup. Fig. 15.a.1  |
| KL03_098 | Ingot     | PC ingot fragment            | Raw mat. | Spot | 35      | 11     | Sup. Fig. 15.a.2  |
| KL03_099 | Droplet   | Amorphous droplet            | Raw mat. | Spot | 27      | 8,5    | Sup. Fig. 14.162  |
| KL03_100 | Droplet   | Amorphous droplet            | Raw mat. | Spot | 18      | 3      | Sup. Fig. 14.148  |
| KL03_101 | n/a       | Unidentifiable rod item      | Complete | GPS  | 315     | 84,5   | Sup. Fig. 14.117  |
| KL03_102 | Pin       | Biconical-headed pin         | Fragment | GPS  | 42      | 2,5    | Sup. Fig. 14.4    |
| KL03_103 | Pin       | Biconical-headed pin         | Complete | GPS  | 72      | 6      | Sup. Fig. 14.5    |
| KL03_104 | Pin       | Biconical-headed pin         | Complete | GPS  | 110     | 4      | Sup. Fig. 14.3    |
| KL03_105 | Pin       | Spindle-headed pin           | Fragment | GPS  | 31,5    | 3,5    | Sup. Fig. 14.6    |
| KL03_106 | Pin       | Spindle-headed pin           | Fragment | GPS  | 18      | 6,5    | Sup. Fig. 14.7    |
| KL03_107 | Pin       | Vase-headed pin              | Fragment | Site | 31      | 1,5    | Sup. Fig. 14.8    |
| KL03_108 | Pin       | Spindle-headed pin           | Fragment | GPS  | 13,5    | 4      | Sup. Fig. 14.9    |
| KL03_109 | Dagger    | Triangular dagger            | Complete | GPS  | 66      | 23,5   | Sup. Fig. 14.26   |
| KL03_110 | Knife     | Mandrel-handled knife        | Complete | GPS  | 125     | 31     | Sup. Fig. 14.35   |
| KL03_111 | Arrowhead | Socketed arrowhead           | Complete | GPS  | 32,5    | 3      | Sup. Fig. 14.75   |
| KL03_112 | Arrowhead | Mandrel Arrowhead            | Complete | GPS  | 41,7    | 2      | Sup. Fig. 14.68   |
| KL03_113 | Arrowhead | Socketed arrowhead           | Complete | Site | 31      | 3,5    | Sup. Fig. 14.69   |
| KL03_114 | Arrowhead | Socketed arrowhead           | Complete | Site | 32,5    | 3      | Sup. Fig. 14.78   |
| KL03_115 | Arrowhead | Socketed arrowhead           | Complete | GPS  | 28,5    | 2,5    | Sup. Fig. 14.66   |

Tab. 1 (continued)

| Item     | Type      | Description                  | Frag.    | GPS  | Max. d. | Weight | Fig.             |
|----------|-----------|------------------------------|----------|------|---------|--------|------------------|
| KL03_116 | Arrowhead | Socketed arrowhead           | Complete | GPS  | 49      | 3,5    | Sup. Fig. 14.77  |
| KL03_117 | n/a       | Ornamented sheet fragment    | Fragment | GPS  | 29      | 0,3    | Sup. Fig. 14.25  |
| KL03_118 | Chisel    | Rod chisel                   | Complete | Site | 52      | 2,5    | Sup. Fig. 14.31  |
| KL03_119 | Chisel    | Square-prof. rod chisel      | Complete | Site | 45      | 2      | Sup. Fig. 14.32  |
| KL03_120 | Chisel    | Square-prof. rod chisel      | Fragment | Site | 21      | 1,5    | Sup. Fig. 14.21  |
| KL03_121 | Chisel    | Square-prof. rod chisel      | Fragment | GPS  | 25,5    | 2,5    | Sup. Fig. 14.33  |
| KL03_122 | Chisel    | Square-prof. rod chisel      | Fragment | Site | 35      | 2,5    | Sup. Fig. 14.34  |
| KL03_123 | Awl       | Square-profile awl           | Complete | Site | 50      | 2      | Sup. Fig. 14.30  |
| KL03_124 | Sickle    | Sickle blade fragment        | Fragment | Site | 21,5    | 4,5    | Sup. Fig. 14.58  |
| KL03_125 | Sickle    | Sickle blade fragment        | Fragment | GPS  | 34,5    | 12     | Sup. Fig. 14.67  |
| KL03_126 | Axe       | Axe blade fragment           | Fragment | GPS  | 10      | 0,3    | Sup. Fig. 14.28  |
| KL03_127 | Knife     | Knife point fragment         | Fragment | GPS  | 23      | 1,5    | Sup. Fig. 14.22  |
| KL03_128 | Ring      | Cast ring                    | Complete | GPS  | 29      | 2      | Sup. Fig. 14.104 |
| KL03_129 | Ring      | Cast ring                    | Complete | GPS  | 11,5    | 1,5    | Sup. Fig. 14.101 |
| KL03_130 | n/a       | Wire fragment                | Fragment | GPS  | 21      | 1,5    | Sup. Fig. 14.55  |
| KL03_131 | n/a       | Weight?                      | Complete | GPS  | 11      | 4      | Sup. Fig. 14.53  |
| KL03_132 | Waste     | Casting sprue                | Raw mat. | GPS  | 24,5    | 4,5    | Sup. Fig. 15.a.6 |
| KL03_133 | Waste     | Pouring cup sprue            | Raw mat. | GPS  | 17,5    | 2      | Sup. Fig. 15.a.8 |
| KL03_134 | n/a       | Rod fragment                 | Fragment | GPS  | 26      | 3      | Sup. Fig. 14.44  |
| KL03_135 | n/a       | Rod fragment                 | Fragment | GPS  | 43,5    | 3      | Sup. Fig. 14.45  |
| KL03_136 | Waste     | Unidentifiable casting waste | Raw mat. | GPS  | 19,5    | 2      | Sup. Fig. 14.23  |
| KL03_137 | Waste     | Pouring cup sprue?           | Raw mat. | GPS  | 27      | 1,5    | n/a              |
| KL03_138 | Droplet   | Amorphous droplet            | Raw mat. | GPS  | 17      | 4      | Sup. Fig. 14.87  |
| KL03_139 | Ingot     | PC ingot fragment            | Raw mat. | GPS  | 19      | 7,5    | Sup. Fig. 14.88  |
| KL03_140 | Ingot     | PC ingot fragment            | Raw mat. | GPS  | 26,5    | 8      | Sup. Fig. 14.113 |
| KL03_141 | Droplet   | Ingot                        | Raw mat. | GPS  | 42      | 23     | Sup. Fig. 14.157 |
| KL03_142 | Ingot     | PC ingot fragment            | Raw mat. | GPS  | 29      | 24,5   | Sup. Fig. 14.138 |
| KL03_143 | Droplet   | Amorphous droplet            | Raw mat. | GPS  | 24      | 9      | Sup. Fig. 14.127 |
| KL03_144 | Droplet   | Amorphous Amorphous droplet  | Raw mat. | GPS  | 13      | 1,5    | Sup. Fig. 14.116 |
| KL03_145 | Ingot     | PC ingot fragment            | Raw mat. | GPS  | 29      | 24,5   | Sup. Fig. 14.130 |
| KL03_146 | Droplet   | Amorphous droplet            | Raw mat. | GPS  | 6       | 3,5    | Sup. Fig. 14.105 |
| KL03_147 | Droplet   | Amorphous droplet            | Raw mat. | GPS  | 28,5    | 5      | Sup. Fig. 14.156 |
| KL03_148 | Droplet   | Amorphous droplet            | Raw mat. | GPS  | 14      | 2      | Sup. Fig. 14.112 |
| KL03_149 | Ingot     | PC ingot fragment            | Raw mat. | GPS  | 63      | 177,5  | Sup. Fig. 14.161 |
| KL03_150 | Ingot     | PC ingot fragment            | Raw mat. | GPS  | 38      | 23,5   | Sup. Fig. 14.136 |
| KL03_151 | Ingot     | PC ingot fragment            | Raw mat. | GPS  | 26      | 11,5   | Sup. Fig. 14.140 |
| KL03_152 | Ingot     | PC ingot fragment            | Raw mat. | GPS  | 26      | 13,5   | Sup. Fig. 14.143 |
| KL03_153 | Ingot     | PC ingot fragment            | Raw mat. | GPS  | 23,5    | 9,5    | Sup. Fig. 14.115 |
| KL03_154 | Droplet   | Amorphous droplet            | Raw mat. | GPS  | 23,5    | 11,5   | Sup. Fig. 14.129 |
| KL03_155 | Droplet   | Amorphous droplet            | Raw mat. | GPS  | 26      | 8      | Sup. Fig. 14.137 |
| KL03_156 | Waste     | Casting sprue                | Raw mat. | GPS  | 24      | 2      | Sup. Fig. 14.144 |
| KL03_157 | Waste     | Unidentifiable cast item     | Raw mat. | GPS  | 29      | 9      | Sup. Fig. 14.114 |
| KL03_158 | Droplet   | Amorphous droplet            | Raw mat. | GPS  | 19,5    | 4,5    | Sup. Fig. 14.126 |
| KL03_159 | Droplet   | Amorphous droplet            | Raw mat. | GPS  | 21      | 6      | Sup. Fig. 14.125 |
| KL03_160 | Droplet   | Amorphous droplet            | Raw mat. | GPS  | 16      | 3,5    | Sup. Fig. 14.118 |
| KL03_161 | Droplet   | Amorphous droplet            | Raw mat. | GPS  | 12,5    | 1      | Sup. Fig. 14.106 |
| KL03_162 | Droplet   | Amorphous droplet            | Raw mat. | GPS  | 15      | 4,5    | Sup. Fig. 14.86  |
| KL03_163 | Droplet   | Amorphous droplet            | Raw mat. | GPS  | 15      | 1      | Sup. Fig. 14.124 |
| KL03_164 | Pin       | Vase-headed pin              | Fragment | GPS  | 39      | 5      | Sup. Fig. 14.10  |
| KL03_165 | Pin       | Biconical-headed pin         | Fragment | GPS  | 10      | 2      | Sup. Fig. 14.11  |
| KL03_166 | Pin       | Biconical-headed pin         | Fragment | GPS  | 10,5    | 2      | Sup. Fig. 14.12  |
| KL03_167 | Bracelet  | Triangular prof. bracelet    | Fragment | GPS  | 51,5    | 40,5   | Sup. Fig. 14.17  |
| KL03_168 | Axe       | Axe blade fragment           | Fragment | GPS  | 22      | 2,5    | Sup. Fig. 14.39  |
| KL03_169 | Axe       | Axe blade fragment           | Fragment | GPS  | 36      | 5,5    | Sup. Fig. 14.40  |
| KL03_170 | Axe       | Axe blade fragment           | Fragment | GPS  | 14,5    | 2      | Sup. Fig. 14.38  |
| KL03_171 | Axe       | Axe blade fragment           | Fragment | GPS  | 15      | 1      | Sup. Fig. 14.29  |

Tab. 1 (continued)

| Item     | Type        | Description                  | Frag.    | GPS  | Max. d. | Weight | Fig.              |
|----------|-------------|------------------------------|----------|------|---------|--------|-------------------|
| KL03_172 | Ring        | Cast ring                    | Complete | GPS  | 18,5    | 1,5    | Sup. Fig. 14.89   |
| KL03_173 | Tube        | trubička                     | Complete | GPS  | 15,5    | 1      | Sup. Fig. 14.100  |
| KL03_174 | Arrowhead   | Socketed arrowhead           | Complete | GPS  | 31,5    | 3      | Sup. Fig. 14.79   |
| KL03_175 | Tube        | Sheet tube                   | Complete | GPS  | 31      | 2      | Sup. Fig. 14.42   |
| KL03_176 | Droplet     | Amorphous droplet            | Raw mat. | GPS  | 21      | 3,5    | Sup. Fig. 14.128  |
| KL04_001 | Pendant     | Disc-shaped pendant          | Complete | GPS  | 34      | 4,5    | Sup. Fig. 15.b.1  |
| KL04_002 | Knife       | Knife point fragment         | Fragment | GPS  | 45      | 5,5    | Sup. Fig. 15.b.7  |
| KL04_003 | Bracelet    | Triangular prof. bracelet    | Fragment | GPS  | 20      | 4      | Sup. Fig. 15.b.5  |
| KL04_004 | Ingot       | PC ingot fragment            | Raw mat. | Spot | 26      | 11     | Sup. Fig. 15.b.17 |
| KL04_005 | Axe         | Axe blade fragment           | Fragment | GPS  | 14      | 4      | Sup. Fig. 15.b.8  |
| KL04_006 | Chisel      | Chisel blade fragment        | Fragment | GPS  | 27      | 6,5    | Sup. Fig. 15.b.11 |
| KL04_007 | n/a         | Square-prof. rod fragment    | Fragment | GPS  | 27      | 6,5    | Sup. Fig. 15.b.12 |
| KL04_008 | Ring        | Cast ring                    | Complete | Site | 17      | 2      | Sup. Fig. 15.b.21 |
| KL04_009 | n/a         | Square-prof. rod fragment    | Fragment | Site | 23      | 4      | Sup. Fig. 15.b.13 |
| KL04_010 | n/a         | Casting sprue                | Fragment | Site | 29      | 6      | Sup. Fig. 15.b.27 |
| KL04_011 | Droplet     | Amorphous droplet            | Raw mat. | Site | 29      | 6      | Sup. Fig. 15.b.26 |
| KL04_012 | Finger ring | Sheet finger ring            | Complete | Site | 23      | 2      | Sup. Fig. 15.b.6  |
| KL04_013 | Waste       | Pouring cup sprue            | Raw mat. | Spot | 27,5    | 3,5    | Sup. Fig. 15.b.25 |
| KL04_014 | Ingot       | PC ingot fragment            | Raw mat. | Spot | 32      | 15,5   | Sup. Fig. 15.b.18 |
| KL04_015 | Waste       | unidentifiable casting waste | Raw mat. | Spot | 22      | 3,5    | Sup. Fig. 15.b.24 |
| KL04_016 | Droplet     | Amorphous droplet            | Raw mat. | Site | 30      | 10,5   | Sup. Fig. 15.b.28 |
| KL04_017 | Ingot       | PC ingot fragment            | Raw mat. | Spot | 40      | 35     | Sup. Fig. 15.b.30 |
| KL04_018 | Waste       | Pouring cup sprue            | Raw mat. | Spot | 30      | 32     | Sup. Fig. 15.b.23 |
| KL04_019 | Pin         | Vase-headed pin              | Complete | GPS  | 70,5    | 6      | Sup. Fig. 15.b.4  |
| KL04_020 | Pendant     | Heart-shaped pendant         | Complete | GPS  | 29,5    | 2,5    | Sup. Fig. 15.b.3  |
| KL04_021 | Pendant     | Perforated pendant           | Complete | GPS  | 18      | 13     | Sup. Fig. 15.b.2  |
| KL04_022 | Arrowhead   | Socketed arrowhead           | Complete | GPS  | 29      | 3      | Sup. Fig. 15.b.16 |
| KL04_023 | Spear       | Spear point fragment         | Fragment | GPS  | 29      | 5,5    | Sup. Fig. 15.b.15 |
| KL04_024 | Sickle      | Sickle blade fragment        | Fragment | GPS  | 27      | 4      | Sup. Fig. 15.b.14 |
| KL04_025 | Sickle      | Sickle point fragment        | Fragment | GPS  | 19      | 1,5    | Sup. Fig. 15.b.10 |
| KL04_026 | Ingot       | PC ingot fragment            | Raw mat. | GPS  | 23,5    | 17,5   | Sup. Fig. 15.b.22 |
| KL04_027 | Droplet     | Amorphous droplet            | Raw mat. | GPS  | 25      | 15     | Sup. Fig. 15.b.19 |
| KL04_028 | Droplet     | Amorphous droplet            | Raw mat. | GPS  | 35,5    | 13,5   | Sup. Fig. 15.b.29 |
| KL04_029 | Axe         | Axe blade fragment           | Fragment | GPS  | 28,5    | 10,5   | Sup. Fig. 15.b.9  |
| KL04_030 | Spear       | Spear                        | Complete | GPS  | 132,5   | 140    | Sup. Fig. 15.b.20 |
| KL06_001 | Bracelet    | Flat bracelet fragment       | Fragment | Site | 66      | 6,5    | Sup. Fig. 15.c.1  |
| KL06_002 | Chisel      | Rod chisel                   | Complete | GPS  | 104     | 11     | Sup. Fig. 15.c.4  |
| KL06_003 | Spear       | Spear point fragment         | Fragment | GPS  | 23      | 5      | Sup. Fig. 15.c.2  |
| KL06_004 | Bracelet    | Round profile bracelet       | Complete | GPS  | 57      | 17     | Sup. Fig. 15.c.3  |
| KL10_001 | Arrowhead   | Socketed arrowhead           | Complete | GPS  | 24      | 1,5    | Sup. Fig. 15.d.1  |
| KL10_002 | Sickle      | Sickle point fragment        | Fragment | GPS  | 32      | 4,5    | Sup. Fig. 15.d.2  |
| KL10_003 | Droplet     | Amorphous droplet            | Raw mat. | GPS  | 26      | 4      | Sup. Fig. 15.d.3  |
| KL10_004 | Droplet     | Amorphous droplet            | Raw mat. | GPS  | 30      | 19     | Sup. Fig. 15.d.4  |
| KL10_005 | Droplet     | Amorphous droplet            | Raw mat. | GPS  | 25      | 14     | Sup. Fig. 15.d.5  |
| KL10_006 | Droplet     | Amorphous droplet            | Raw mat. | GPS  | 30,5    | 10     | Sup. Fig. 15.d.6  |
| KL11_001 | Arrowhead   | Socketed arrowhead           | Fragment | GPS  | 33      | 2,5    | Sup. Fig. 15.e.1  |
| KL12_001 | Sickle      | Sickle tang fragment         | Fragment | GPS  | 30      | 10     | Sup. Fig. 15.f.1  |
| KL12_002 | Ingot       | PC ingot fragment            | Raw mat. | GPS  | 48      | 243,5  | Sup. Fig. 15.f.5  |
| KL12_003 | Ingot       | PC ingot fragment            | Raw mat. | GPS  | 99      | 456    | Sup. Fig. 15.f.7  |
| KL12_004 | Ingot       | PC ingot fragment            | Raw mat. | GPS  | 112     | 725    | Sup. Fig. 15.f.3  |
| KL12_005 | Ingot       | PC ingot fragment            | Raw mat. | GPS  | 93      | 567    | Sup. Fig. 15.f.4  |
| KL12_006 | Ingot       | PC ingot fragment            | Raw mat. | GPS  | 37,5    | 48     | Sup. Fig. 15.f.6  |
| KL12_007 | Ring        | Cast ring                    | Complete | GPS  | 13      | 0,3    | Sup. Fig. 15.f.2  |
| KL13_001 | Chisel      | Square-prof. rod chisel      | Complete | GPS  | 45      | 3      | Sup. Fig. 16.a.4  |
| KL13_002 | Bracelet    | Triangular prof. bracelet    | Fragment | Spot | 42      | 8      | Sup. Fig. 16.a.2  |
| KL13_003 | Spear       | Spear point fragment         | Fragment | Spot | 34,5    | 11,5   | Sup. Fig. 16.a.6  |

Tab. 1 (continued)

| Item     | Type      | Description                | Frag.    | GPS  | Max. d. | Weight | Fig.              |
|----------|-----------|----------------------------|----------|------|---------|--------|-------------------|
| KL13_004 | Droplet   | Amorphous droplet          | Raw mat. | Spot | 29,5    | 11,5   | Sup. Fig. 16.a.10 |
| KL13_005 | Ingot     | PC ingot fragment          | Raw mat. | GPS  | 21      | 6      | Sup. Fig. 16.a.12 |
| KL13_006 | Droplet   | Amorphous droplet          | Raw mat. | GPS  | 14      | 2      | Sup. Fig. 16.a.13 |
| KL13_007 | Ring      | Cast ring                  | Complete | Spot | 9       | 0,5    | Sup. Fig. 16.a.9  |
| KL13_008 | Chisel    | Rod chisel                 | Fragment | Spot | 68      | 6      | Sup. Fig. 16.a.3  |
| KL13_009 | n/a       | Unidentifiable fragment    | Fragment | Spot | 20      | 2,5    | Sup. Fig. 16.a.7  |
| KL13_010 | n/a       | Ornamented sheet fragment  | Fragment | Spot | 33      | 4      | Sup. Fig. 16.a.1  |
| KL13_011 | Droplet   | Amorphous droplet          | Raw mat. | Spot | 19      | 6      | Sup. Fig. 16.a.11 |
| KL13_012 | Droplet   | Amorphous droplet          | Raw mat. | Spot | 44      | 19     | Sup. Fig. 16.a.14 |
| KL13_013 | Ingot     | PC ingot fragment          | Raw mat. | Spot | 24      | 7      | Sup. Fig. 16.a.15 |
| KL13_014 | Droplet   | Amorphous droplet          | Raw mat. | Spot | 26      | 6      | Sup. Fig. 16.a.16 |
| KL13_015 | Knife     | Knife point fragment       | Fragment | GPS  | 25      | 1,5    | Sup. Fig. 16.a.5  |
| KL13_016 | Arrowhead | Socketed arrowhead         | Complete | GPS  | 32      | 2,5    | Sup. Fig. 16.a.8  |
| KL14_001 | Sickle    | Sickle tang fragment       | Fragment | Spot | 32,5    | 5,5    | Sup. Fig. 16.b.1  |
| KL14_002 | Sickle    | Sickle blade fragment      | Fragment | Spot | 51      | 16,5   | Sup. Fig. 16.b.2  |
| KL14_003 | Sickle    | Sickle tang fragment       | Fragment | Spot | 76,5    | 25     | Sup. Fig. 16.b.3  |
| KL15_001 | Sickle    | Sickle point fragment      | Fragment | GPS  | 21      | 5      | Sup. Fig. 16.c.1  |
| KL15_002 | Sickle    | Sickle point fragment      | Fragment | GPS  | 36      | 4,5    | Sup. Fig. 16.c.2  |
| KL15_003 | Bracelet  | Rod bracer fragment        | Fragment | GPS  | 17,5    | 3      | Sup. Fig. 16.c.3  |
| KL15_004 | Droplet   | Amorphous droplet          | Raw mat. | GPS  | 38      | 18,5   | Sup. Fig. 16.c.4  |
| KL15_005 | Droplet   | Amorphous droplet          | Raw mat. | GPS  | 37      | 6      | Sup. Fig. 16.c.5  |
| PA01_001 | Ring      | Cast ring                  | Complete | GPS  | 15      | 0,5    | Sup. Fig. 16.d.4  |
| PA01_002 | n/a       | Sheet arrowhead?           | Fragment | GPS  | 38      | 1,5    | Sup. Fig. 16.d.7  |
| PA01_003 | Spear     | Spear fragment             | Fragment | GPS  | 30      | 7,5    | Sup. Fig. 16.d.8  |
| PA01_004 | Ring      | Cast ring                  | Complete | GPS  | 23      | 2      | Sup. Fig. 16.d.5  |
| PA01_005 | Knife     | Knife point fragment       | Fragment | GPS  | 55      | 6,5    | Sup. Fig. 16.d.3  |
| PA01_006 | Waste     | Casting waste fragment     | Fragment | GPS  | 32      | 28,5   | Sup. Fig. 16.d.16 |
| PA01_007 | Droplet   | Amorphous droplet          | Raw mat. | GPS  | 21      | 5      | Sup. Fig. 16.d.14 |
| PA01_008 | Harness   | Horse harness part         | Complete | GPS  | 31      | 15,5   | Sup. Fig. 16.d.2  |
| PA01_010 | Droplet   | Amorphous droplet          | Raw mat. | Site | 27      | 5      | Sup. Fig. 16.d.12 |
| PA01_011 | Droplet   | Amorphous droplet          | Raw mat. | Site | 25      | 5,5    | Sup. Fig. 16.d.13 |
| PA01_012 | Ingot     | Ingot                      | Raw mat. | Site | 64      | 91,5   | Sup. Fig. 16.d.15 |
| PA01_013 | Arrowhead | Socketed arrowhead         | Fragment | GPS  | 29      | 3,5    | Sup. Fig. 16.d.9  |
| PA01_014 | Pin       | Club-headed pin            | Fragment | GPS  | 40      | 6,5    | Sup. Fig. 16.d.1  |
| PA01_015 | Ingot     | PC ingot fragment          | Raw mat. | GPS  | 31      | 11,5   | Sup. Fig. 16.d.11 |
| PA01_016 | Arrowhead | Socketed arrowhead         | Complete | GPS  | 42      | 3      | Sup. Fig. 16.d.6  |
| PA02_001 | Ingot     | PC ingot fragment          | Raw mat. | GPS  | 50      | 140    | Sup. Fig. 16.e.1  |
| PA03_001 | Knife     | Knife point fragment       | Fragment | GPS  | 47      | 4      | Sup. Fig. 16.f.1  |
| PA03_002 | Ring      | Cast ring                  | Complete | GPS  | 29      | 2,5    | Sup. Fig. 16.f.2  |
| PA03_003 | Ring      | Cast ring                  | Complete | GPS  | 21      | 2      | Sup. Fig. 16.f.3  |
| PA03_004 | Ring      | Cast ring                  | Complete | GPS  | 25,5    | 1      | Sup. Fig. 16.f.4  |
| PA07_001 | Ring      | Cast ring                  | Complete | GPS  | 16      | 1      | Sup. Fig. 16.g.2  |
| PA07_002 | Ring      | Cast ring                  | Complete | GPS  | 16      | 1,5    | Sup. Fig. 16.g.3  |
| PA07_003 | Dagger    | Dagger point fragment      | Fragment | GPS  | 40      | 9,5    | Sup. Fig. 16.g.1  |
| PA07_004 | Droplet   | Amorphous droplet          | Raw mat. | GPS  | 22      | 4,5    | Sup. Fig. 16.g.4  |
| PA10_001 | Sickle    | Sickle blade fragment      | Fragment | GPS  | 23      | 5      | n/a               |
| PA11_001 | Dagger    | Dagger point fragment      | Fragment | GPS  | 46      | 11,5   | Sup. Fig. 16.h.1  |
| PE01_001 | Chisel    | Rod chisel                 | Complete | GPS  | 60      | 2      | Sup. Fig. 16.i.11 |
| PE01_002 | Chisel    | Rod chisel                 | Complete | GPS  | 72      | 11,2   | Sup. Fig. 16.i.12 |
| PE01_003 | Chisel    | Rod chisel                 | Complete | GPS  | 96      | 19     | Sup. Fig. 16.i.13 |
| PE01_004 | Chisel    | Rod chisel                 | Complete | GPS  | 37      | 3      | Sup. Fig. 16.i.28 |
| PE01_005 | Chisel    | Rod chisel                 | Complete | GPS  | 56      | 2      | Sup. Fig. 16.i.29 |
| PE01_006 | Knife     | Knife blade fragment?      | Fragment | GPS  | 24      | 2      | Sup. Fig. 16.i.8  |
| PE01_007 | Sickle    | Sickle point fragment      | Fragment | GPS  | 21      | 3      | Sup. Fig. 16.i.9  |
| PE01_008 | Tube      | Sheet tube                 | Complete | GPS  | 29      | 0,5    | Sup. Fig. 16.i.17 |
| PE01_009 | Ring      | Three interconnected rings | Complete | GPS  | 26      | 1      | Sup. Fig. 16.i.6  |

Tab. 1 (continued)

| Item     | Type      | Description                | Frag.    | GPS  | Max. d. | Weight | Fig.              |
|----------|-----------|----------------------------|----------|------|---------|--------|-------------------|
| PE01_010 | Dagger    | Dagger point fragment      | Fragment | GPS  | 25      | 1,5    | Sup. Fig. 16.i.15 |
| PE01_011 | n/a       | Triangular prof. fragment  | Fragment | GPS  | 14      | 2      | Sup. Fig. 16.i.7  |
| PE01_012 | n/a       | Ornamented rod fragment    | Fragment | GPS  | 12      | 1,5    | Sup. Fig. 16.i.3  |
| PE01_013 | Cap       | Sheet cap                  | Complete | GPS  | 14      | 0,3    | Sup. Fig. 16.i.5  |
| PE01_014 | n/a       | Socket fragment?           | Fragment | GPS  | 27      | 4,5    | Sup. Fig. 16.i.23 |
| PE01_015 | n/a       | Sheet fragment (corner)    | Fragment | GPS  | 20      | 1      | Sup. Fig. 16.i.10 |
| PE01_016 | n/a       | Flanged handle fragment?   | Fragment | GPS  | 32      | 3      | Sup. Fig. 16.i.25 |
| PE01_017 | n/a       | Bent rod fragment          | Fragment | GPS  | 21      | 7,5    | Sup. Fig. 16.i.24 |
| PE01_018 | Tool      | Square-profile rod         | Fragment | GPS  | 59      | 9,5    | Sup. Fig. 16.i.31 |
| PE01_019 | Ingot     | PC ingot fragment          | Raw mat. | GPS  | 23      | 15     | Sup. Fig. 16.i.18 |
| PE01_021 | Ingot     | PC ingot fragment          | Raw mat. | GPS  | 17      | 5,5    | Sup. Fig. 16.i.20 |
| PE01_022 | Ingot     | PC ingot fragment          | Raw mat. | GPS  | 22      | 11     | Sup. Fig. 16.i.21 |
| PE01_023 | Droplet   | Amorphous droplet          | Raw mat. | GPS  | 49      | 58,6   | Sup. Fig. 16.i.26 |
| PE01_024 | Harness   | Cross-shaped nob           | Complete | GPS  | 13      | 2,5    | Sup. Fig. 16.i.4  |
| PE01_025 | Ingot     | PC ingot fragment          | Raw mat. | GPS  | 24      | 7      | Sup. Fig. 16.i.19 |
| PE01_026 | Ornament  | Torded wire fragment       | Fragment | Site | 94      | 4      | Sup. Fig. 16.i.14 |
| PE01_027 | Pendant   | Disc-shaped sheet pendant  | Complete | GPS  | 24,5    | 1,5    | Sup. Fig. 16.i.2  |
| PE01_028 | Pin       | Pin needle fragment        | Fragment | GPS  | 53      | 2,5    | Sup. Fig. 16.i.30 |
| PE01_029 | n/a       | Unidentifiable fragment    | Fragment | GPS  | 18,5    | 2,5    | Sup. Fig. 16.i.27 |
| PE01_030 | n/a       | Sheet frag. with bordering | Fragment | GPS  | 43,5    | 5      | Sup. Fig. 16.i.16 |
| PE01_031 | Ingot     | PC ingot fragment          | Raw mat. | GPS  | 29      | 39     | Sup. Fig. 16.i.22 |
| PE01_032 | Droplet   | Amorphous droplet          | Raw mat. | GPS  | 25      | 13     | Sup. Fig. 16.i.32 |
| PE01_033 | Pin       | Globular-headed perf. pin  | Complete | GPS  | 52      | 5      | Sup. Fig. 16.i.1  |
| PE02_001 | Axe       | Flanged axe fragment       | Fragment | Spot | 56,5    | 87,5   | Sup. Fig. 17.a.1  |
| PE02_002 | Ingot     | PC ingot fragment          | Raw mat. | Spot | 36      | 30     | Sup. Fig. 17.a.2  |
| PE02_003 | Ingot     | PC ingot fragment          | Raw mat. | Spot | 27      | 12     | Sup. Fig. 17.a.3  |
| PE03_001 | Arrowhead | Socketed arrowhead         | Complete | GPS  | 44,5    | 6,5    | Sup. Fig. 17.b.4  |
| PE03_002 | Sickle    | Sickle blade fragment      | Fragment | GPS  | 33      | 7,5    | Sup. Fig. 17.b.8  |
| PE03_003 | Spear     | Spear fragment             | Fragment | GPS  | 30      | 11     | Sup. Fig. 17.b.5  |
| PE03_004 | Ring      | Cast ring                  | Complete | GPS  | 15      | 1,5    | Sup. Fig. 17.b.2  |
| PE03_005 | Rod ingot | Rod ingot fragment         | Raw mat. | GPS  | 33      | 6,5    | Sup. Fig. 17.b.6  |
| PE03_006 | n/a       | Unidentifiable fragment    | Fragment | GPS  | 24      | 2      | Sup. Fig. 17.b.9  |
| PE03_007 | n/a       | Unidentifiable fragment    | Fragment | GPS  | 48      | 4,5    | Sup. Fig. 17.b.13 |
| PE03_008 | n/a       | Rod fragment               | Fragment | GPS  | 93      | 6      | Sup. Fig. 17.b.7  |
| PE03_009 | Ingot     | PC ingot fragment          | Raw mat. | GPS  | 51      | 92,5   | Sup. Fig. 17.b.10 |
| PE03_010 | Ingot     | PC ingot fragment          | Raw mat. | GPS  | 45      | 70,5   | Sup. Fig. 17.b.11 |
| PE03_011 | Ingot     | PC ingot fragment          | Raw mat. | GPS  | 42      | 25     | Sup. Fig. 17.b.12 |
| PE03_012 | Ingot     | PC ingot fragment          | Raw mat. | GPS  | 51,5    | 57     | n/a               |
| PE03_013 | Pin       | Biconical-headed pin       | Fragment | GPS  | 21      | 5      | Sup. Fig. 17.b.1  |
| PE03_014 | Ring      | Cast ring                  | Complete | GPS  | 15,5    | 1      | Sup. Fig. 17.b.3  |
| PE04_001 | Sickle    | Sickle blade fragment      | Fragment | GPS  | 28      | 7      | Sup. Fig. 17.c.1  |
| PE04_002 | n/a       | Sheet fragment             | Fragment | GPS  | 33,5    | 3      | Sup. Fig. 17.c.2  |
| PE04_003 | Knife     | Knife point fragment       | Fragment | GPS  | 25,5    | 1      | Sup. Fig. 17.c.3  |
| PE04_004 | Ingot     | PC ingot fragment          | Raw mat. | GPS  | 50      | 61,5   | Sup. Fig. 17.c.7  |
| PE04_005 | Ingot     | PC ingot fragment          | Raw mat. | GPS  | 30      | 32,5   | Sup. Fig. 17.c.8  |
| PE04_006 | Arrowhead | Arrowhead fragment         | Fragment | GPS  | 19,5    | 3      | Sup. Fig. 17.c.9  |
| PE04_007 | Arrowhead | Socketed arrowhead         | Complete | Spot | 23,5    | 2,5    | Sup. Fig. 17.c.10 |
| PE04_008 | Harness   | Harness nob                | Complete | Spot | 12      | 1,5    | Sup. Fig. 17.c.5  |
| PE04_009 | Ring      | Cast ring                  | Complete | Spot | 18      | 2      | Sup. Fig. 17.c.11 |
| PE04_010 | Ring      | Cast ring                  | Complete | Spot | 18,5    | 2      | Sup. Fig. 17.c.12 |
| PE04_011 | n/a       | Unidentifiable fragment    | Fragment | Spot | 38      | 10     | Sup. Fig. 17.c.4  |
| PE04_012 | Droplet   | Amorphous droplet          | Raw mat. | Spot | 12,5    | 1,5    | Sup. Fig. 17.c.13 |
| PE04_013 | Droplet   | Amorphous droplet          | Raw mat. | Spot | 18,5    | 4,5    | Sup. Fig. 17.c.14 |
| PE04_014 | Droplet   | Amorphous droplet          | Raw mat. | Spot | 15      | 1,5    | Sup. Fig. 17.c.6  |
| PE05_001 | Droplet   | Amorphous droplet          | Raw mat. | GPS  | 17      | 4      | Sup. Fig. 17.d.1  |
| PE05_002 | Pin       | Pin needle fragment        | Fragment | GPS  | 63      | 3      | Sup. Fig. 17.d.2  |



Tab. 2: Index of depictions on Supplementary Figs 11–17.

| Fig.            | Item     | Fig.            | Item     | Fig.            | Item     |
|-----------------|----------|-----------------|----------|-----------------|----------|
| Sup. Fig. 11:1  | KL01_054 | Sup. Fig. 11:57 | KL01_039 | Sup. Fig. 12:22 | KL02_133 |
| Sup. Fig. 11:2  | KL01_055 | Sup. Fig. 11:58 | KL01_040 | Sup. Fig. 12:23 | KL02_126 |
| Sup. Fig. 11:3  | KL01_053 | Sup. Fig. 11:59 | KL01_041 | Sup. Fig. 12:24 | KL02_155 |
| Sup. Fig. 11:4  | KL01_051 | Sup. Fig. 11:60 | KL01_042 | Sup. Fig. 12:25 | KL02_064 |
| Sup. Fig. 11:5  | KL01_001 | Sup. Fig. 11:61 | KL01_043 | Sup. Fig. 12:27 | KL02_073 |
| Sup. Fig. 11:6  | KL01_002 | Sup. Fig. 11:62 | KL01_045 | Sup. Fig. 12:28 | KL02_056 |
| Sup. Fig. 11:7  | KL01_003 | Sup. Fig. 11:63 | KL01_083 | Sup. Fig. 12:29 | KL02_140 |
| Sup. Fig. 11:8  | KL01_065 | Sup. Fig. 11:64 | KL01_082 | Sup. Fig. 12:31 | KL02_046 |
| Sup. Fig. 11:9  | KL01_052 | Sup. Fig. 11:65 | KL01_084 | Sup. Fig. 12:32 | KL02_138 |
| Sup. Fig. 11:10 | KL01_007 | Sup. Fig. 11:66 | KL01_046 | Sup. Fig. 12:33 | KL02_071 |
| Sup. Fig. 11:11 | KL01_008 | Sup. Fig. 11:67 | KL01_021 | Sup. Fig. 12:35 | KL02_035 |
| Sup. Fig. 11:12 | KL01_004 | Sup. Fig. 11:68 | KL01_044 | Sup. Fig. 12:35 | KL02_131 |
| Sup. Fig. 11:13 | KL01_005 | Sup. Fig. 11:69 | KL01_029 | Sup. Fig. 12:36 | KL02_066 |
| Sup. Fig. 11:14 | KL01_072 | Sup. Fig. 11:70 | KL01_036 | Sup. Fig. 12:37 | KL02_067 |
| Sup. Fig. 11:15 | KL01_064 | Sup. Fig. 11:71 | KL01_080 | Sup. Fig. 12:38 | KL02_139 |
| Sup. Fig. 11:16 | KL01_066 | Sup. Fig. 11:72 | KL01_079 | Sup. Fig. 12:39 | KL02_028 |
| Sup. Fig. 11:17 | KL01_009 | Sup. Fig. 11:73 | KL01_067 | Sup. Fig. 12:40 | KL02_141 |
| Sup. Fig. 11:18 | KL01_010 | Sup. Fig. 11:74 | KL01_085 | Sup. Fig. 12:41 | KL02_029 |
| Sup. Fig. 11:19 | KL01_011 | Sup. Fig. 11:75 | KL01_068 | Sup. Fig. 12:43 | KL02_136 |
| Sup. Fig. 11:20 | KL01_012 | Sup. Fig. 11:76 | KL01_081 | Sup. Fig. 12:44 | KL02_049 |
| Sup. Fig. 11:21 | KL01_013 | Sup. Fig. 11:77 | KL01_086 | Sup. Fig. 12:44 | KL02_061 |
| Sup. Fig. 11:22 | KL01_063 | Sup. Fig. 11:78 | KL01_093 | Sup. Fig. 12:45 | KL02_164 |
| Sup. Fig. 11:23 | KL01_062 | Sup. Fig. 11:79 | KL01_092 | Sup. Fig. 12:46 | KL02_134 |
| Sup. Fig. 11:24 | KL01_060 | Sup. Fig. 11:80 | KL01_089 | Sup. Fig. 12:47 | KL02_060 |
| Sup. Fig. 11:25 | KL01_071 | Sup. Fig. 11:81 | KL01_091 | Sup. Fig. 12:48 | KL02_063 |
| Sup. Fig. 11:26 | KL01_014 | Sup. Fig. 11:82 | KL01_047 | Sup. Fig. 12:49 | KL02_135 |
| Sup. Fig. 11:27 | KL01_015 | Sup. Fig. 11:83 | KL01_050 | Sup. Fig. 12:50 | KL02_021 |
| Sup. Fig. 11:28 | KL01_016 | Sup. Fig. 11:84 | KL01_058 | Sup. Fig. 12:51 | KL02_062 |
| Sup. Fig. 11:29 | KL01_017 | Sup. Fig. 11:85 | KL01_057 | Sup. Fig. 12:52 | KL02_132 |
| Sup. Fig. 11:30 | KL01_018 | Sup. Fig. 11:86 | KL01_056 | Sup. Fig. 12:53 | KL02_050 |
| Sup. Fig. 11:31 | KL01_019 | Sup. Fig. 11:87 | KL01_059 | Sup. Fig. 12:54 | KL02_044 |
| Sup. Fig. 11:32 | KL01_020 | Sup. Fig. 11:88 | KL01_049 | Sup. Fig. 12:55 | KL02_125 |
| Sup. Fig. 11:33 | KL01_069 | Sup. Fig. 11:89 | KL01_048 | Sup. Fig. 12:56 | KL02_065 |
| Sup. Fig. 11:34 | KL01_061 | Sup. Fig. 11:90 | KL01_087 | Sup. Fig. 12:57 | KL02_128 |
| Sup. Fig. 11:35 | KL01_073 | Sup. Fig. 11:91 | KL01_088 | Sup. Fig. 12:58 | KL02_129 |
| Sup. Fig. 11:36 | KL01_022 | Sup. Fig. 12:1  | KL02_001 | Sup. Fig. 12:59 | KL02_006 |
| Sup. Fig. 11:37 | KL01_023 | Sup. Fig. 12:2  | KL02_058 | Sup. Fig. 12:60 | KL02_137 |
| Sup. Fig. 11:38 | KL01_024 | Sup. Fig. 12:3  | KL02_112 | Sup. Fig. 12:61 | KL02_053 |
| Sup. Fig. 11:39 | KL01_025 | Sup. Fig. 12:4  | KL02_114 | Sup. Fig. 12:62 | KL02_052 |
| Sup. Fig. 11:40 | KL01_026 | Sup. Fig. 12:5  | KL02_118 | Sup. Fig. 12:63 | KL02_153 |
| Sup. Fig. 11:41 | KL01_027 | Sup. Fig. 12:6  | KL02_116 | Sup. Fig. 12:64 | KL02_148 |
| Sup. Fig. 11:42 | KL01_028 | Sup. Fig. 12:7  | KL02_117 | Sup. Fig. 12:65 | KL02_154 |
| Sup. Fig. 11:43 | KL01_077 | Sup. Fig. 12:8  | KL02_115 | Sup. Fig. 12:66 | KL02_008 |
| Sup. Fig. 11:44 | KL01_070 | Sup. Fig. 12:9  | KL02_113 | Sup. Fig. 12:67 | KL02_007 |
| Sup. Fig. 11:45 | KL01_074 | Sup. Fig. 12:10 | KL02_041 | Sup. Fig. 12:68 | KL02_031 |
| Sup. Fig. 11:46 | KL01_030 | Sup. Fig. 12:11 | KL02_119 | Sup. Fig. 12:69 | KL02_152 |
| Sup. Fig. 11:47 | KL01_031 | Sup. Fig. 12:12 | KL02_009 | Sup. Fig. 12:70 | KL02_143 |
| Sup. Fig. 11:48 | KL01_032 | Sup. Fig. 12:13 | KL02_059 | Sup. Fig. 12:71 | KL02_144 |
| Sup. Fig. 11:49 | KL01_033 | Sup. Fig. 12:14 | KL02_121 | Sup. Fig. 12:72 | KL02_145 |
| Sup. Fig. 11:50 | KL01_034 | Sup. Fig. 12:15 | KL02_122 | Sup. Fig. 12:73 | KL02_146 |
| Sup. Fig. 11:51 | KL01_035 | Sup. Fig. 12:16 | KL02_124 | Sup. Fig. 12:74 | KL02_147 |
| Sup. Fig. 11:52 | KL01_076 | Sup. Fig. 12:17 | KL02_123 | Sup. Fig. 12:75 | KL02_149 |
| Sup. Fig. 11:53 | KL01_075 | Sup. Fig. 12:18 | KL02_045 | Sup. Fig. 12:76 | KL02_150 |
| Sup. Fig. 11:54 | KL01_078 | Sup. Fig. 12:19 | KL02_151 | Sup. Fig. 12:77 | KL02_030 |
| Sup. Fig. 11:55 | KL01_037 | Sup. Fig. 12:20 | KL02_069 | Sup. Fig. 12:78 | KL02_042 |
| Sup. Fig. 11:56 | KL01_038 | Sup. Fig. 12:21 | KL02_047 | Sup. Fig. 12:80 | KL02_036 |

Tab. 2 (continued)

| Fig.             | Item     | Fig.            | Item     | Fig.             | Item     |
|------------------|----------|-----------------|----------|------------------|----------|
| Sup. Fig. 12:81  | KL02_037 | Sup. Fig. 13:23 | KL02_011 | Sup. Fig. 13:84  | KL02_204 |
| Sup. Fig. 12:82  | KL02_038 | Sup. Fig. 13:24 | KL02_012 | Sup. Fig. 13:85  | KL02_203 |
| Sup. Fig. 12:83  | KL02_040 | Sup. Fig. 13:25 | KL02_013 | Sup. Fig. 13:86  | KL02_106 |
| Sup. Fig. 12:84  | KL02_039 | Sup. Fig. 13:26 | KL02_015 | Sup. Fig. 13:87  | KL02_216 |
| Sup. Fig. 12:85  | KL02_032 | Sup. Fig. 13:27 | KL02_016 | Sup. Fig. 13:89  | KL02_207 |
| Sup. Fig. 12:86  | KL02_162 | Sup. Fig. 13:28 | KL02_022 | Sup. Fig. 13:90  | KL02_215 |
| Sup. Fig. 12:87  | KL02_161 | Sup. Fig. 13:29 | KL02_017 | Sup. Fig. 13:91  | KL02_211 |
| Sup. Fig. 12:88  | KL02_160 | Sup. Fig. 13:30 | KL02_018 | Sup. Fig. 13:92  | KL02_210 |
| Sup. Fig. 12:89  | KL02_166 | Sup. Fig. 13:31 | KL02_019 | Sup. Fig. 13:93  | KL02_214 |
| Sup. Fig. 12:90  | KL02_170 | Sup. Fig. 13:32 | KL02_020 | Sup. Fig. 13:94  | KL02_212 |
| Sup. Fig. 12:91  | KL02_167 | Sup. Fig. 13:33 | KL02_043 | Sup. Fig. 13:95  | KL02_205 |
| Sup. Fig. 12:92  | KL02_177 | Sup. Fig. 13:34 | KL02_200 | Sup. Fig. 13:96  | KL02_209 |
| Sup. Fig. 12:93  | KL02_176 | Sup. Fig. 13:35 | KL02_189 | Sup. Fig. 13:97  | KL02_213 |
| Sup. Fig. 12:94  | KL02_082 | Sup. Fig. 13:36 | KL02_023 | Sup. Fig. 13:98  | KL02_208 |
| Sup. Fig. 12:95  | KL02_075 | Sup. Fig. 13:37 | KL02_024 | Sup. Fig. 13:99  | KL02_057 |
| Sup. Fig. 12:96  | KL02_079 | Sup. Fig. 13:38 | KL02_025 | Sup. Fig. 13:100 | KL02_120 |
| Sup. Fig. 12:97  | KL02_076 | Sup. Fig. 13:39 | KL02_026 | Sup. Fig. 14:1   | KL03_005 |
| Sup. Fig. 12:98  | KL02_077 | Sup. Fig. 13:40 | KL02_027 | Sup. Fig. 14:2   | KL03_040 |
| Sup. Fig. 12:99  | KL02_080 | Sup. Fig. 13:41 | KL02_199 | Sup. Fig. 14:3   | KL03_104 |
| Sup. Fig. 12:100 | KL02_074 | Sup. Fig. 13:42 | KL02_191 | Sup. Fig. 14:4   | KL03_102 |
| Sup. Fig. 12:101 | KL02_078 | Sup. Fig. 13:43 | KL02_192 | Sup. Fig. 14:5   | KL03_103 |
| Sup. Fig. 12:102 | KL02_081 | Sup. Fig. 13:44 | KL02_190 | Sup. Fig. 14:6   | KL03_105 |
| Sup. Fig. 12:103 | KL02_159 | Sup. Fig. 13:45 | KL02_185 | Sup. Fig. 14:7   | KL03_106 |
| Sup. Fig. 12:104 | KL02_034 | Sup. Fig. 13:46 | KL02_186 | Sup. Fig. 14:8   | KL03_107 |
| Sup. Fig. 12:105 | KL02_163 | Sup. Fig. 13:47 | KL02_187 | Sup. Fig. 14:9   | KL03_108 |
| Sup. Fig. 12:106 | KL02_173 | Sup. Fig. 13:48 | KL02_188 | Sup. Fig. 14:10  | KL03_164 |
| Sup. Fig. 12:107 | KL02_165 | Sup. Fig. 13:49 | KL02_193 | Sup. Fig. 14:11  | KL03_165 |
| Sup. Fig. 12:108 | KL02_048 | Sup. Fig. 13:54 | KL02_197 | Sup. Fig. 14:12  | KL03_166 |
| Sup. Fig. 12:109 | KL02_171 | Sup. Fig. 13:55 | KL02_198 | Sup. Fig. 14:13  | KL03_058 |
| Sup. Fig. 12:110 | KL02_175 | Sup. Fig. 13:56 | KL02_195 | Sup. Fig. 14:14  | KL03_067 |
| Sup. Fig. 12:111 | KL02_178 | Sup. Fig. 13:57 | KL02_196 | Sup. Fig. 14:15  | KL03_051 |
| Sup. Fig. 12:112 | KL02_179 | Sup. Fig. 13:58 | KL02_194 | Sup. Fig. 14:17  | KL03_167 |
| Sup. Fig. 12:113 | KL02_180 | Sup. Fig. 13:59 | KL02_085 | Sup. Fig. 14:19  | KL03_087 |
| Sup. Fig. 12:114 | KL02_174 | Sup. Fig. 13:59 | KL02_090 | Sup. Fig. 14:20  | KL03_088 |
| Sup. Fig. 12:115 | KL02_002 | Sup. Fig. 13:60 | KL02_092 | Sup. Fig. 14:21  | KL03_120 |
| Sup. Fig. 12:116 | KL02_130 | Sup. Fig. 13:61 | KL02_099 | Sup. Fig. 14:22  | KL03_127 |
| Sup. Fig. 13:1   | KL02_005 | Sup. Fig. 13:62 | KL02_100 | Sup. Fig. 14:23  | KL03_136 |
| Sup. Fig. 13:2   | KL02_072 | Sup. Fig. 13:63 | KL02_014 | Sup. Fig. 14:24  | KL03_077 |
| Sup. Fig. 13:3   | KL02_068 | Sup. Fig. 13:66 | KL02_102 | Sup. Fig. 14:25  | KL03_117 |
| Sup. Fig. 13:4   | KL02_127 | Sup. Fig. 13:67 | KL02_097 | Sup. Fig. 14:26  | KL03_109 |
| Sup. Fig. 13:5   | KL02_003 | Sup. Fig. 13:68 | KL02_093 | Sup. Fig. 14:27  | KL03_066 |
| Sup. Fig. 13:6   | KL02_055 | Sup. Fig. 13:69 | KL02_094 | Sup. Fig. 14:28  | KL03_126 |
| Sup. Fig. 13:7   | KL02_054 | Sup. Fig. 13:70 | KL02_095 | Sup. Fig. 14:29  | KL03_171 |
| Sup. Fig. 13:8   | KL02_182 | Sup. Fig. 13:71 | KL02_202 | Sup. Fig. 14:30  | KL03_123 |
| Sup. Fig. 13:9   | KL02_184 | Sup. Fig. 13:72 | KL02_098 | Sup. Fig. 14:31  | KL03_118 |
| Sup. Fig. 13:11  | KL02_156 | Sup. Fig. 13:73 | KL02_217 | Sup. Fig. 14:32  | KL03_119 |
| Sup. Fig. 13:12  | KL02_158 | Sup. Fig. 13:74 | KL02_105 | Sup. Fig. 14:33  | KL03_121 |
| Sup. Fig. 13:13  | KL02_183 | Sup. Fig. 13:75 | KL02_107 | Sup. Fig. 14:34  | KL03_122 |
| Sup. Fig. 13:14  | KL02_181 | Sup. Fig. 13:76 | KL02_110 | Sup. Fig. 14:35  | KL03_110 |
| Sup. Fig. 13:15  | KL02_051 | Sup. Fig. 13:77 | KL02_111 | Sup. Fig. 14:36  | KL03_035 |
| Sup. Fig. 13:16  | KL02_070 | Sup. Fig. 13:78 | KL02_096 | Sup. Fig. 14:37  | KL03_079 |
| Sup. Fig. 13:18  | KL02_101 | Sup. Fig. 13:79 | KL02_108 | Sup. Fig. 14:38  | KL03_170 |
| Sup. Fig. 13:19  | KL02_084 | Sup. Fig. 13:80 | KL02_109 | Sup. Fig. 14:39  | KL03_168 |
| Sup. Fig. 13:20  | KL02_083 | Sup. Fig. 13:81 | KL02_206 | Sup. Fig. 14:40  | KL03_169 |
| Sup. Fig. 13:21  | KL02_004 | Sup. Fig. 13:82 | KL02_103 | Sup. Fig. 14:41  | KL03_057 |
| Sup. Fig. 13:22  | KL02_010 | Sup. Fig. 13:83 | KL02_104 | Sup. Fig. 14:42  | KL03_175 |

Tab. 2 (continued)

| Fig.            | Item     | Fig.             | Item     | Fig.              | Item     |
|-----------------|----------|------------------|----------|-------------------|----------|
| Sup. Fig. 14.43 | KL03_072 | Sup. Fig. 14.99  | KL03_060 | Sup. Fig. 14.157  | KL03_141 |
| Sup. Fig. 14.44 | KL03_134 | Sup. Fig. 14.100 | KL03_173 | Sup. Fig. 14.158  | KL03_086 |
| Sup. Fig. 14.45 | KL03_135 | Sup. Fig. 14.101 | KL03_129 | Sup. Fig. 14.159  | KL03_047 |
| Sup. Fig. 14.46 | KL03_032 | Sup. Fig. 14.102 | KL03_076 | Sup. Fig. 14.160  | KL03_083 |
| Sup. Fig. 14.47 | KL03_003 | Sup. Fig. 14.103 | KL03_045 | Sup. Fig. 14.161  | KL03_149 |
| Sup. Fig. 14.48 | KL03_078 | Sup. Fig. 14.104 | KL03_128 | Sup. Fig. 14.162  | KL03_099 |
| Sup. Fig. 14.49 | KL03_004 | Sup. Fig. 14.105 | KL03_146 | Sup. Fig. 15.a.1  | KL03_097 |
| Sup. Fig. 14.50 | KL03_094 | Sup. Fig. 14.106 | KL03_161 | Sup. Fig. 15.a.2  | KL03_098 |
| Sup. Fig. 14.51 | KL03_095 | Sup. Fig. 14.107 | KL03_010 | Sup. Fig. 15.a.3  | KL03_081 |
| Sup. Fig. 14.52 | KL03_090 | Sup. Fig. 14.108 | KL03_011 | Sup. Fig. 15.a.4  | KL03_082 |
| Sup. Fig. 14.53 | KL03_131 | Sup. Fig. 14.109 | KL03_012 | Sup. Fig. 15.a.6  | KL03_132 |
| Sup. Fig. 14.54 | KL03_089 | Sup. Fig. 14.110 | KL03_013 | Sup. Fig. 15.a.7  | KL03_096 |
| Sup. Fig. 14.55 | KL03_130 | Sup. Fig. 14.111 | KL03_014 | Sup. Fig. 15.a.8  | KL03_133 |
| Sup. Fig. 14.56 | KL03_064 | Sup. Fig. 14.112 | KL03_148 | Sup. Fig. 15.a.9  | KL03_062 |
| Sup. Fig. 14.57 | KL03_044 | Sup. Fig. 14.113 | KL03_140 | Sup. Fig. 15.a.10 | KL03_091 |
| Sup. Fig. 14.58 | KL03_124 | Sup. Fig. 14.114 | KL03_157 | Sup. Fig. 15.a.11 | KL03_046 |
| Sup. Fig. 14.59 | KL03_037 | Sup. Fig. 14.115 | KL03_153 | Sup. Fig. 15.a.12 | KL03_038 |
| Sup. Fig. 14.60 | KL03_041 | Sup. Fig. 14.116 | KL03_144 | Sup. Fig. 15.a.13 | KL03_034 |
| Sup. Fig. 14.61 | KL03_043 | Sup. Fig. 14.117 | KL03_101 | Sup. Fig. 15.a.14 | KL03_039 |
| Sup. Fig. 14.62 | KL03_042 | Sup. Fig. 14.118 | KL03_160 | Sup. Fig. 15.a.15 | KL03_080 |
| Sup. Fig. 14.63 | KL03_056 | Sup. Fig. 14.119 | KL03_015 | Sup. Fig. 15.a.16 | KL03_008 |
| Sup. Fig. 14.64 | KL03_001 | Sup. Fig. 14.120 | KL03_016 | Sup. Fig. 15.b.1  | KL04_001 |
| Sup. Fig. 14.65 | KL03_065 | Sup. Fig. 14.121 | KL03_017 | Sup. Fig. 15.b.2  | KL04_021 |
| Sup. Fig. 14.66 | KL03_115 | Sup. Fig. 14.122 | KL03_018 | Sup. Fig. 15.b.3  | KL04_020 |
| Sup. Fig. 14.67 | KL03_125 | Sup. Fig. 14.123 | KL03_019 | Sup. Fig. 15.b.4  | KL04_019 |
| Sup. Fig. 14.68 | KL03_112 | Sup. Fig. 14.124 | KL03_163 | Sup. Fig. 15.b.5  | KL04_003 |
| Sup. Fig. 14.69 | KL03_113 | Sup. Fig. 14.125 | KL03_159 | Sup. Fig. 15.b.6  | KL04_012 |
| Sup. Fig. 14.70 | KL03_071 | Sup. Fig. 14.126 | KL03_158 | Sup. Fig. 15.b.7  | KL04_002 |
| Sup. Fig. 14.72 | KL03_002 | Sup. Fig. 14.127 | KL03_143 | Sup. Fig. 15.b.8  | KL04_005 |
| Sup. Fig. 14.72 | KL03_068 | Sup. Fig. 14.128 | KL03_176 | Sup. Fig. 15.b.9  | KL04_029 |
| Sup. Fig. 14.73 | KL03_069 | Sup. Fig. 14.129 | KL03_154 | Sup. Fig. 15.b.10 | KL04_025 |
| Sup. Fig. 14.74 | KL03_070 | Sup. Fig. 14.130 | KL03_145 | Sup. Fig. 15.b.11 | KL04_006 |
| Sup. Fig. 14.75 | KL03_111 | Sup. Fig. 14.131 | KL03_023 | Sup. Fig. 15.b.12 | KL04_007 |
| Sup. Fig. 14.76 | KL03_061 | Sup. Fig. 14.132 | KL03_024 | Sup. Fig. 15.b.13 | KL04_009 |
| Sup. Fig. 14.77 | KL03_116 | Sup. Fig. 14.134 | KL03_021 | Sup. Fig. 15.b.14 | KL04_024 |
| Sup. Fig. 14.78 | KL03_114 | Sup. Fig. 14.135 | KL03_022 | Sup. Fig. 15.b.15 | KL04_023 |
| Sup. Fig. 14.79 | KL03_174 | Sup. Fig. 14.136 | KL03_150 | Sup. Fig. 15.b.16 | KL04_022 |
| Sup. Fig. 14.80 | KL03_048 | Sup. Fig. 14.137 | KL03_155 | Sup. Fig. 15.b.17 | KL04_004 |
| Sup. Fig. 14.81 | KL03_049 | Sup. Fig. 14.138 | KL03_142 | Sup. Fig. 15.b.18 | KL04_014 |
| Sup. Fig. 14.82 | KL03_050 | Sup. Fig. 14.140 | KL03_151 | Sup. Fig. 15.b.19 | KL04_027 |
| Sup. Fig. 14.83 | KL03_009 | Sup. Fig. 14.141 | KL03_025 | Sup. Fig. 15.b.20 | KL04_030 |
| Sup. Fig. 14.84 | KL03_006 | Sup. Fig. 14.142 | KL03_026 | Sup. Fig. 15.b.21 | KL04_008 |
| Sup. Fig. 14.85 | KL03_007 | Sup. Fig. 14.143 | KL03_152 | Sup. Fig. 15.b.22 | KL04_026 |
| Sup. Fig. 14.86 | KL03_162 | Sup. Fig. 14.144 | KL03_156 | Sup. Fig. 15.b.23 | KL04_018 |
| Sup. Fig. 14.87 | KL03_138 | Sup. Fig. 14.145 | KL03_027 | Sup. Fig. 15.b.24 | KL04_015 |
| Sup. Fig. 14.88 | KL03_139 | Sup. Fig. 14.146 | KL03_028 | Sup. Fig. 15.b.25 | KL04_013 |
| Sup. Fig. 14.89 | KL03_172 | Sup. Fig. 14.147 | KL03_033 | Sup. Fig. 15.b.26 | KL04_011 |
| Sup. Fig. 14.90 | KL03_073 | Sup. Fig. 14.148 | KL03_100 | Sup. Fig. 15.b.27 | KL04_010 |
| Sup. Fig. 14.91 | KL03_053 | Sup. Fig. 14.149 | KL03_085 | Sup. Fig. 15.b.28 | KL04_016 |
| Sup. Fig. 14.92 | KL03_074 | Sup. Fig. 14.150 | KL03_029 | Sup. Fig. 15.b.29 | KL04_028 |
| Sup. Fig. 14.93 | KL03_054 | Sup. Fig. 14.151 | KL03_030 | Sup. Fig. 15.b.30 | KL04_017 |
| Sup. Fig. 14.94 | KL03_075 | Sup. Fig. 14.152 | KL03_031 | Sup. Fig. 15.c.1  | KL06_001 |
| Sup. Fig. 14.95 | KL03_093 | Sup. Fig. 14.153 | KL03_084 | Sup. Fig. 15.c.2  | KL06_003 |
| Sup. Fig. 14.96 | KL03_055 | Sup. Fig. 14.154 | KL03_063 | Sup. Fig. 15.c.3  | KL06_004 |
| Sup. Fig. 14.97 | KL03_092 | Sup. Fig. 14.155 | KL03_036 | Sup. Fig. 15.c.4  | KL06_002 |
| Sup. Fig. 14.98 | KL03_059 | Sup. Fig. 14.156 | KL03_147 | Sup. Fig. 15.d.1  | KL10_001 |

Tab. 2 (continued)

| Fig.              | Item     | Fig.              | Item     | Fig.              | Item     |
|-------------------|----------|-------------------|----------|-------------------|----------|
| Sup. Fig. 15.d.2  | KL10_002 | Sup. Fig. 16.d.16 | PA01_006 | Sup. Fig. 17.b.6  | PE03_005 |
| Sup. Fig. 15.d.3  | KL10_003 | Sup. Fig. 16.e.1  | PA02_001 | Sup. Fig. 17.b.7  | PE03_008 |
| Sup. Fig. 15.d.4  | KL10_004 | Sup. Fig. 16.f.1  | PA03_001 | Sup. Fig. 17.b.8  | PE03_002 |
| Sup. Fig. 15.d.5  | KL10_005 | Sup. Fig. 16.f.2  | PA03_002 | Sup. Fig. 17.b.9  | PE03_006 |
| Sup. Fig. 15.d.6  | KL10_006 | Sup. Fig. 16.f.3  | PA03_003 | Sup. Fig. 17.b.10 | PE03_009 |
| Sup. Fig. 15.e.1  | KL11_001 | Sup. Fig. 16.f.4  | PA03_004 | Sup. Fig. 17.b.11 | PE03_010 |
| Sup. Fig. 15.f.1  | KL12_001 | Sup. Fig. 16.g.1  | PA07_003 | Sup. Fig. 17.b.12 | PE03_011 |
| Sup. Fig. 15.f.2  | KL12_007 | Sup. Fig. 16.g.2  | PA07_001 | Sup. Fig. 17.b.13 | PE03_007 |
| Sup. Fig. 15.f.3  | KL12_004 | Sup. Fig. 16.g.3  | PA07_002 | Sup. Fig. 17.c.1  | PE04_001 |
| Sup. Fig. 15.f.4  | KL12_005 | Sup. Fig. 16.g.4  | PA07_004 | Sup. Fig. 17.c.2  | PE04_002 |
| Sup. Fig. 15.f.5  | KL12_002 | Sup. Fig. 16.h.1  | PA11_001 | Sup. Fig. 17.c.3  | PE04_003 |
| Sup. Fig. 15.f.6  | KL12_006 | Sup. Fig. 16.i.1  | PE01_033 | Sup. Fig. 17.c.4  | PE04_011 |
| Sup. Fig. 15.f.7  | KL12_003 | Sup. Fig. 16.i.2  | PE01_027 | Sup. Fig. 17.c.5  | PE04_008 |
| Sup. Fig. 16.a.1  | KL13_010 | Sup. Fig. 16.i.3  | PE01_012 | Sup. Fig. 17.c.6  | PE04_014 |
| Sup. Fig. 16.a.2  | KL13_002 | Sup. Fig. 16.i.4  | PE01_024 | Sup. Fig. 17.c.7  | PE04_004 |
| Sup. Fig. 16.a.3  | KL13_008 | Sup. Fig. 16.i.5  | PE01_013 | Sup. Fig. 17.c.8  | PE04_005 |
| Sup. Fig. 16.a.4  | KL13_001 | Sup. Fig. 16.i.6  | PE01_009 | Sup. Fig. 17.c.9  | PE04_006 |
| Sup. Fig. 16.a.5  | KL13_015 | Sup. Fig. 16.i.7  | PE01_011 | Sup. Fig. 17.c.10 | PE04_007 |
| Sup. Fig. 16.a.6  | KL13_003 | Sup. Fig. 16.i.8  | PE01_006 | Sup. Fig. 17.c.11 | PE04_009 |
| Sup. Fig. 16.a.7  | KL13_009 | Sup. Fig. 16.i.9  | PE01_007 | Sup. Fig. 17.c.12 | PE04_010 |
| Sup. Fig. 16.a.8  | KL13_016 | Sup. Fig. 16.i.10 | PE01_015 | Sup. Fig. 17.c.13 | PE04_012 |
| Sup. Fig. 16.a.9  | KL13_007 | Sup. Fig. 16.i.11 | PE01_001 | Sup. Fig. 17.c.14 | PE04_013 |
| Sup. Fig. 16.a.10 | KL13_004 | Sup. Fig. 16.i.12 | PE01_002 | Sup. Fig. 17.d.1  | PE05_001 |
| Sup. Fig. 16.a.11 | KL13_011 | Sup. Fig. 16.i.13 | PE01_003 | Sup. Fig. 17.d.2  | PE05_002 |
| Sup. Fig. 16.a.12 | KL13_005 | Sup. Fig. 16.i.14 | PE01_026 | Sup. Fig. 17.e.1  | BA01_014 |
| Sup. Fig. 16.a.13 | KL13_006 | Sup. Fig. 16.i.15 | PE01_010 | Sup. Fig. 17.e.2  | BA01_006 |
| Sup. Fig. 16.a.14 | KL13_012 | Sup. Fig. 16.i.16 | PE01_030 | Sup. Fig. 17.e.3  | BA01_002 |
| Sup. Fig. 16.a.15 | KL13_013 | Sup. Fig. 16.i.17 | PE01_008 | Sup. Fig. 17.e.4  | BA01_007 |
| Sup. Fig. 16.a.16 | KL13_014 | Sup. Fig. 16.i.18 | PE01_019 | Sup. Fig. 17.e.5  | BA01_001 |
| Sup. Fig. 16.b.1  | KL14_001 | Sup. Fig. 16.i.19 | PE01_025 | Sup. Fig. 17.e.6  | BA01_004 |
| Sup. Fig. 16.b.2  | KL14_002 | Sup. Fig. 16.i.20 | PE01_021 | Sup. Fig. 17.e.7  | BA01_008 |
| Sup. Fig. 16.b.3  | KL14_003 | Sup. Fig. 16.i.21 | PE01_022 | Sup. Fig. 17.e.8  | BA01_003 |
| Sup. Fig. 16.c.1  | KL15_001 | Sup. Fig. 16.i.22 | PE01_031 | Sup. Fig. 17.e.9  | BA01_015 |
| Sup. Fig. 16.c.2  | KL15_002 | Sup. Fig. 16.i.23 | PE01_014 | Sup. Fig. 17.e.10 | BA01_020 |
| Sup. Fig. 16.c.3  | KL15_003 | Sup. Fig. 16.i.24 | PE01_017 | Sup. Fig. 17.e.17 | BA01_011 |
| Sup. Fig. 16.c.4  | KL15_004 | Sup. Fig. 16.i.25 | PE01_016 | Sup. Fig. 17.e.11 | BA01_021 |
| Sup. Fig. 16.c.5  | KL15_005 | Sup. Fig. 16.i.26 | PE01_023 | Sup. Fig. 17.e.12 | BA01_022 |
| Sup. Fig. 16.d.1  | PA01_014 | Sup. Fig. 16.i.27 | PE01_029 | Sup. Fig. 17.e.13 | BA01_023 |
| Sup. Fig. 16.d.2  | PA01_008 | Sup. Fig. 16.i.28 | PE01_004 | Sup. Fig. 17.e.14 | BA01_009 |
| Sup. Fig. 16.d.3  | PA01_005 | Sup. Fig. 16.i.29 | PE01_005 | Sup. Fig. 17.e.15 | BA01_010 |
| Sup. Fig. 16.d.4  | PA01_001 | Sup. Fig. 16.i.30 | PE01_028 | Sup. Fig. 17.e.16 | BA01_005 |
| Sup. Fig. 16.d.5  | PA01_004 | Sup. Fig. 16.i.31 | PE01_018 | Sup. Fig. 17.e.18 | BA01_012 |
| Sup. Fig. 16.d.6  | PA01_016 | Sup. Fig. 16.i.32 | PE01_032 | Sup. Fig. 17.e.19 | BA01_016 |
| Sup. Fig. 16.d.7  | PA01_002 | Sup. Fig. 17.a.1  | PE02_001 | Sup. Fig. 17.e.20 | BA01_018 |
| Sup. Fig. 16.d.8  | PA01_003 | Sup. Fig. 17.a.2  | PE02_002 | Sup. Fig. 17.e.21 | BA01_013 |
| Sup. Fig. 16.d.9  | PA01_013 | Sup. Fig. 17.a.3  | PE02_003 | Sup. Fig. 17.e.22 | BA01_017 |
| Sup. Fig. 16.d.11 | PA01_015 | Sup. Fig. 17.b.1  | PE03_013 | Sup. Fig. 17.e.23 | BA01_019 |
| Sup. Fig. 16.d.12 | PA01_010 | Sup. Fig. 17.b.2  | PE03_004 | Sup. Fig. 17.f.1  | BA02_001 |
| Sup. Fig. 16.d.13 | PA01_011 | Sup. Fig. 17.b.3  | PE03_014 | Sup. Fig. 17.f.2  | BA02_002 |
| Sup. Fig. 16.d.14 | PA01_007 | Sup. Fig. 17.b.4  | PE03_001 | Sup. Fig. 17.f.3  | BA02_003 |
| Sup. Fig. 16.d.15 | PA01_012 | Sup. Fig. 17.b.5  | PE03_003 | Sup. Fig. 17.g.1  | HV03_001 |

Tab. 3: Elements composition of items sampled for XRF analysis.

| Item code | Item type     | Fe [%] | Ni [%] | Cu [%] | As [%] | Co [%] | Ag [%] | Sn [%] | Sb [%] | Pb [%] |
|-----------|---------------|--------|--------|--------|--------|--------|--------|--------|--------|--------|
| BA01_001  | Sickle        | 0,261  | 0,446  | 92,2   | 0,466  | 0,0337 | n/d    | 4,69   | 0,137  | 1,72   |
| BA01_003  | Axe           | 0,108  | 0,292  | 91,9   | n/d    | 0,0202 | n/d    | 7,39   | 0,125  | 0,204  |
| BA01_004  | Sickle        | 0,134  | 0,369  | 94,5   | n/d    | 0,0255 | n/d    | 2,32   | 0,185  | 0,462  |
| BA01_005  | Ingot         | 2,84   | 0,259  | 96,7   | n/d    | 0,0429 | n/d    | 0,0461 | 0,0934 | n/d    |
| BA02_001  | Sickle        | 0,152  | 0,846  | 94,8   | 0,433  | 0,0349 | n/d    | 3      | n/d    | 0,694  |
| KL01_002  | Sickle        | 0,187  | 0,593  | 83,9   | 2,31   | 0,052  | 0,308  | 2,54   | 1,05   | 9,05   |
| KL01_007  | Sickle        | 0,704  | 1,63   | 92,9   | 1,07   | 0,0624 | n/d    | 3,18   | 0,131  | 0,278  |
| KL01_009  | Axe           | 0,151  | 0,361  | 90,7   | n/d    | 0,0114 | n/d    | 8,54   | n/d    | 0,235  |
| KL01_010  | Refuse        | 0,0116 | 0,402  | 94     | n/d    | 0,0246 | n/d    | 4,96   | n/d    | 0,568  |
| KL01_011  | Refuse        | 0,434  | n/d    | 98,8   | n/d    | n/d    | 0,0992 | n/d    | 0,604  | 0,0696 |
| KL01_019  | Refuse        | 0,318  | 0,249  | 94,2   | n/d    | 0,0344 | 0,0345 | 4,17   | 0,136  | 0,821  |
| KL01_020  | Refuse        | 0,598  | 0,268  | 89,1   | 0,429  | 0,158  | n/d    | 7,75   | 0,424  | 0,242  |
| KL01_028  | Ingot         | 13,2   | 2,74   | 79,9   | 1,87   | 0,124  | n/d    | n/d    | 0,108  | n/d    |
| KL01_029  | Ingot         | 1,77   | 0,178  | 95,9   | 1,36   | 0,0977 | n/d    | n/d    | 0,139  | 0,0831 |
| KL01_033  | Droplet       | 0,0328 | 0,802  | 89,8   | 0,58   | 0,11   | 0,593  | 4,95   | 1,19   | 1,96   |
| KL01_034  | Ingot         | 0,959  | 1      | 93,4   | 1,06   | 0,0933 | 0,305  | n/d    | 1,98   | 0,471  |
| KL01_036  | Droplet       | 0,625  | 1,33   | 96,7   | 1,19   | 0,0127 | n/d    | n/d    | 0,101  | 0,0397 |
| KL01_037  | Droplet       | 0,252  | 0,456  | 87,8   | 0,841  | 0,0446 | 0,232  | 7,96   | 0,722  | 1,67   |
| KL01_038  | Droplet       | 0,423  | n/d    | 99,2   | n/d    | n/d    | n/d    | 0,101  | 0,159  | 0,122  |
| KL01_039  | Ingot         | 0,282  | 1,97   | 96,7   | n/d    | 0,0311 | n/d    | n/d    | 0,107  | n/d    |
| KL01_040  | Ingot         | 0,875  | 0,0421 | 98,7   | n/d    | 0,0299 | 0,0103 | 0,0328 | 0,262  | n/d    |
| KL01_041  | Droplet       | 97,9   | n/d    | 0,452  | n/d    | n/d    | n/d    | n/d    | 0,0734 | n/d    |
| KL01_042  | Droplet       | 0,621  | n/d    | 99,1   | n/d    | n/d    | n/d    | 0,0215 | 0,274  | n/d    |
| KL01_043  | Droplet ingot | 0,0495 | 0,443  | 83,8   | 0,315  | 0,0455 | 0,174  | 12,3   | 0,545  | 2,35   |
| KL01_044  | Droplet       | 2,34   | 0,643  | 96,2   | n/d    | 0,0438 | n/d    | n/d    | 0,353  | 0,0439 |
| KL01_048  | Axe           | 0,952  | 0,619  | 90,3   | n/d    | 0,0091 | n/d    | 7,76   | n/d    | 0,0788 |
| KL01_052  | Razor         | n/d    | 0,493  | 90,9   | 1,91   | 0,0154 | 0,271  | 1,74   | 0,721  | 3,96   |
| KL01_054  | Torc          | 0,123  | 0,315  | 92     | 0,388  | 0,0313 | 0,109  | 4,53   | n/d    | 2,45   |
| KL01_059  | Arrowhead     | 0,151  | 0,338  | 90,5   | 0,437  | 0,0365 | n/d    | 7,85   | 0,254  | 0,415  |
| KL01_060  | Sickle        | 0,86   | 0,558  | 94,8   | n/d    | 0,0418 | 0,0541 | 2,53   | 0,13   | 1,03   |
| KL01_062  | Axe           | 0,0276 | 0,511  | 91,9   | 1,36   | 0,0363 | 0,376  | 2,84   | 0,867  | 2,07   |
| KL01_063  | Axe           | 0,207  | 0,326  | 91     | 0,855  | 0,0219 | 0,0752 | 5,83   | 0,386  | 1,23   |
| KL01_065  | Axe           | 0,0446 | 0,532  | 92,5   | 0,932  | 0,016  | 0,182  | 4,47   | 0,433  | 0,897  |
| KL01_067  | Refuse        | 0,148  | 0,471  | 89,7   | 0,558  | 0,0286 | n/d    | 6,15   | n/d    | 2,9    |
| KL01_069  | Droplet ingot | 0,0514 | 0,233  | 90,3   | 2,71   | 0,0219 | 0,0858 | 6,03   | 0,301  | 0,294  |
| KL01_072  | Axe           | 0,0205 | n/d    | 95,4   | 3,42   | n/d    | 0,581  | n/d    | 0,473  | 0,105  |
| KL01_074  | Ingot         | 0,908  | 0,606  | 95,3   | 1,88   | 0,0584 | 0,0168 | 0,325  | 0,671  | 0,166  |
| KL01_077  | Droplet ingot | 0,338  | 0,0156 | 91,6   | 6,09   | n/d    | 0,925  | n/d    | 0,65   | 0,176  |
| KL02_003  | N/A           | 0,175  | 0,0319 | 90,7   | n/d    | n/d    | n/d    | 7,77   | 0,111  | n/d    |
| KL02_005  | Refuse        | 0,143  | 0,238  | 88,2   | 0,179  | 0,0276 | n/d    | 10,7   | 0,302  | 0,184  |
| KL02_006  | Axe           | 0,15   | 0,493  | 88     | 1,12   | 0,0751 | 0,407  | 5,3    | 1,05   | 3,39   |
| KL02_008  | Knife         | 0,027  | 0,525  | 90,2   | 1,55   | 0,0369 | 0,393  | 5,48   | 0,716  | 1,04   |
| KL02_009  | Pin           | 0,33   | 0,417  | 90,2   | 1,57   | 0,0401 | n/d    | 6,35   | 0,19   | 0,879  |
| KL02_010  | Ingot         | 2,59   | 3,11   | 92,2   | n/d    | 0,198  | n/d    | 0,0754 | n/d    | 0,0637 |
| KL02_014  | Droplet       | 0,194  | 0,187  | 86,3   | 1,7    | 0,0113 | 0,179  | 9,52   | 0,709  | 1,18   |
| KL02_018  | Ingot         | 0,208  | 0,236  | 86,2   | n/d    | 0,026  | 0,15   | 11,1   | 0,465  | 1,58   |
| KL02_020  | Ingot         | 2,05   | 0,502  | 93,3   | 3,82   | 0,118  | n/d    | n/d    | 0,113  | 0,099  |
| KL02_021  | Knife         | 1,01   | 0,534  | 92,9   | 0,215  | 0,103  | 0,221  | 3,67   | 0,48   | 0,853  |
| KL02_025  | Droplet       | 1,4    | 0,0484 | 98,2   | n/d    | 0,0187 | 0,0172 | 0,0287 | 0,225  | 0,0231 |
| KL02_027  | Ingot         | 4,37   | 0,338  | 90,5   | 4,03   | 0,17   | n/d    | 0,0422 | 0,102  | 0,248  |
| KL02_042  | Arrowhead     | 0,155  | 0,158  | 93,2   | 0,589  | 0,0071 | 0,0817 | 3,31   | 0,294  | 2,13   |
| KL02_053  | Sickle        | 0,0292 | 0,453  | 88,9   | 0,3    | 0,0265 | n/d    | 6,53   | 0,134  | 3,66   |
| KL02_054  | Refuse        | 0,759  | 0,578  | 89,7   | 1,69   | 0,117  | 0,412  | 1,63   | 1,42   | 3,73   |
| KL02_055  | Refuse        | 0,0207 | 0,215  | 88,5   | n/d    | 0,0257 | 0,133  | 8,5    | 0,482  | 2,15   |
| KL02_061  | Axe           | 0,356  | 0,269  | 93,2   | 1,35   | 0,0701 | 0,35   | 2,28   | 1,18   | 0,882  |
| KL02_063  | Knife         | 0,185  | 0,223  | 93,4   | 0,326  | 0,0188 | n/d    | 5,39   | 0,145  | 0,259  |

Tab. 3 (continued)

| Item code | Item type     | Fe [%] | Ni [%] | Cu [%] | As [%] | Co [%] | Ag [%] | Sn [%] | Sb [%] | Pb [%] |
|-----------|---------------|--------|--------|--------|--------|--------|--------|--------|--------|--------|
| KL02_064  | Dagger        | 0,158  | 0,346  | 94     | 0,698  | 0,0133 | 0,185  | 2,69   | 0,389  | 1,46   |
| KL02_066  | Chisel        | n/d    | 0,302  | 96,6   | n/d    | n/d    | 0,132  | 2,09   | 0,345  | 0,458  |
| KL02_067  | Chisel        | 0,115  | 0,177  | 95,2   | n/d    | n/d    | n/d    | 3,88   | 0,209  | 0,336  |
| KL02_115  | Jewel         | 0,0371 | 0,305  | 94,8   | 0,895  | n/d    | n/d    | 3,91   | n/d    | 0,078  |
| KL02_119  | Jewel         | 0,0498 | 0,387  | 94,7   | 0,371  | n/d    | n/d    | 3,8    | 0,113  | 0,572  |
| KL02_121  | Jewel         | 0,0768 | 0,0394 | 81,2   | 0,224  | n/d    | n/d    | 4,97   | 0,153  | 13,3   |
| KL02_122  | Jewel         | 0,32   | 0,167  | 80,9   | 1,51   | 0,0271 | 0,0259 | 3,57   | 0,28   | 13,2   |
| KL02_123  | Jewel         | 0,0642 | 0,189  | 93,4   | n/d    | 0,0375 | n/d    | 6,1    | n/d    | 0,215  |
| KL02_125  | Sickle        | 0,162  | 0,0346 | 94,6   | n/d    | n/d    | n/d    | 4,91   | 0,195  | 0,0539 |
| KL02_128  | Knife         | 0,0987 | 0,233  | 93,1   | 0,768  | 0,0132 | n/d    | 5,04   | 0,256  | 0,413  |
| KL02_130  | Core          | n/d    | 0,169  | 86,9   | 0,291  | n/d    | 0,112  | 5,73   | 0,322  | 6,48   |
| KL02_131  | Chisel        | 0,117  | 0,488  | 91,5   | 0,917  | 0,0057 | 0,154  | 3,79   | 0,446  | 2,5    |
| KL02_132  | Axe           | 0,0724 | 0,613  | 91,4   | 1,16   | 0,0553 | 0,231  | 3,81   | 1,5    | 1,08   |
| KL02_134  | Knife         | n/d    | 0,562  | 91,9   | 0,839  | 0,0151 | 0,119  | 3,91   | 0,371  | 2,31   |
| KL02_135  | Knife         | 0,131  | 0,279  | 93,7   | n/d    | n/d    | n/d    | 5,75   | 0,141  | n/d    |
| KL02_136  | Axe           | 0,641  | 0,0735 | 94,1   | n/d    | 0,129  | 0,0483 | 4,41   | n/d    | 0,628  |
| KL02_138  | Chisel        | 0,0976 | n/d    | 94     | 1,31   | n/d    | 0,708  | 3,67   | n/d    | 0,187  |
| KL02_140  | Chisel        | 1,3    | 0,812  | 92,6   | 0,534  | 0,237  | 0,198  | 2,7    | 0,31   | 1,29   |
| KL02_148  | Arrowhead     | 0,0326 | 0,301  | 96,3   | n/d    | 0,0141 | 0,0971 | 2      | 0,304  | 0,963  |
| KL02_151  | N/A           | 0,352  | 0,363  | 93,2   | 0,704  | 0,0373 | n/d    | 4,99   | 0,197  | 0,17   |
| KL02_153  | Arrowhead     | 0,104  | 0,174  | 94,3   | n/d    | 0,0098 | 0,0733 | 2,97   | 0,508  | 1,86   |
| KL02_155  | Spear         | 0,232  | 0,6    | 90,8   | 0,277  | n/d    | 0,0613 | 6,96   | 0,535  | 0,485  |
| KL02_156  | Refuse        | 0,0818 | 0,232  | 97,1   | 1,06   | 0,0139 | 0,0886 | 0,744  | 0,322  | 0,331  |
| KL02_164  | Knife         | 0,0254 | 0,39   | 90,3   | 3,07   | n/d    | 0,363  | 2,88   | 0,861  | 2,08   |
| KL02_182  | Refuse        | 0,191  | 0,0097 | 90     | 5,82   | 0,0059 | 0,524  | 2,06   | 1,04   | 0,328  |
| KL02_187  | Droplet       | 0,0723 | 0,431  | 93,6   | 0,626  | n/d    | 0,109  | 3,93   | 0,288  | 0,933  |
| KL02_191  | Droplet ingot | 1,67   | 0,956  | 90,8   | 3,14   | 0,0663 | 0,473  | 0,134  | 2,56   | 0,181  |
| KL02_205  | Droplet       | 0,344  | 0,273  | 89,4   | 2,55   | n/d    | n/d    | 6,57   | 0,283  | 0,427  |
| KL02_211  | Droplet       | 0,514  | 0,441  | 91,3   | 1,46   | 0,0379 | 0,0722 | 3,42   | 0,378  | 2,39   |
| KL03_003  | Axe           | n/d    | 0,448  | 91,9   | 0,422  | n/d    | 0,269  | 4,27   | 0,834  | 1,88   |
| KL03_006  | Ingot         | 0,779  | 0,0908 | 97,1   | 1,7    | 0,0649 | n/d    | n/d    | 0,225  | 0,0292 |
| KL03_007  | Ingot         | 1,88   | n/d    | 91,3   | 0,234  | n/d    | 0,167  | n/d    | 5,58   | n/d    |
| KL03_008  | Refuse        | 0,139  | 0,121  | 89,7   | 0,185  | n/d    | n/d    | 0,516  | n/d    | 9,3    |
| KL03_009  | Ingot         | 0,038  | 0,431  | 87,8   | 0,213  | 0,0143 | 0,159  | 9,98   | 0,492  | 0,911  |
| KL03_011  | Ingot         | 2,33   | 0,0589 | 97,6   | n/d    | n/d    | n/d    | n/d    | n/d    | n/d    |
| KL03_012  | Ingot         | 4,37   | 0,119  | 94     | n/d    | 0,0535 | n/d    | 0,0151 | 0,0796 | n/d    |
| KL03_013  | Droplet       | 0,762  | 0,124  | 96,4   | 2,31   | 0,0764 | n/d    | n/d    | 0,0903 | 0,2    |
| KL03_014  | Droplet       | 0,474  | 1,11   | 90,5   | 0,505  | 0,0431 | n/d    | 6,99   | 0,179  | 0,236  |
| KL03_015  | Droplet       | 6,3    | 1,74   | 91,1   | 0,363  | 0,072  | n/d    | n/d    | n/d    | 0,0679 |
| KL03_016  | Droplet       | 1,74   | 0,0479 | 97,9   | n/d    | 0,0154 | n/d    | n/d    | 0,3    | n/d    |
| KL03_021  | Droplet       | 0,887  | 0,0727 | 95     | 3      | 0,0353 | 0,0109 | 0,013  | 0,0893 | 0,127  |
| KL03_022  | Ingot         | 4,3    | 0,215  | 94,8   | 0,294  | 0,0665 | n/d    | 0,0244 | 0,274  | 0,0615 |
| KL03_023  | Ingot         | 0,904  | 0,231  | 97,8   | n/d    | 0,0441 | 0,136  | n/d    | 0,248  | n/d    |
| KL03_024  | Droplet ingot | 0,0647 | 0,174  | 90,2   | n/d    | n/d    | 0,208  | 8,4    | 0,548  | 0,389  |
| KL03_026  | Ingot         | 0,202  | 0,182  | 99,2   | n/d    | 0,0203 | 0,015  | n/d    | 0,403  | 0,0243 |
| KL03_027  | Droplet       | 0,165  | 0,0978 | 89,2   | n/d    | n/d    | 0,0697 | 10,2   | 0,144  | 0,0757 |
| KL03_028  | Ingot         | 0,466  | 0,174  | 98,6   | n/d    | n/d    | 0,0231 | n/d    | 0,312  | 0,026  |
| KL03_029  | Droplet       | 0,152  | 0,155  | 89,3   | n/d    | 0,0275 | 0,0444 | 9,6    | 0,475  | 0,246  |
| KL03_030  | Droplet       | 0,495  | 0,179  | 99,2   | n/d    | 0,0285 | n/d    | 0,0426 | n/d    | n/d    |
| KL03_032  | Ingot         | 0,0873 | 0,609  | 93,5   | 2,38   | 0,0951 | 0,613  | 0,614  | 1,78   | 0,328  |
| KL03_033  | Ingot         | 0,0266 | n/d    | 99,8   | n/d    | n/d    | 0,0825 | 0,0999 | n/d    | n/d    |
| KL03_034  | Jewel         | 0,204  | 0,0863 | 88,2   | n/d    | n/d    | 0,0287 | 10,9   | 0,373  | 0,201  |
| KL03_035  | Axe           | 0,267  | 0,119  | 93,2   | n/d    | 0,0227 | 0,071  | 4,78   | 0,448  | 1,08   |
| KL03_106  | Jewel         | 0,0199 | 0,452  | 94,6   | n/d    | n/d    | n/d    | 4,88   | n/d    | 0,0385 |
| KL03_111  | Arrowhead     | 0,216  | 0,272  | 95,4   | n/d    | 0,0065 | n/d    | 3,56   | 0,146  | 0,257  |
| KL03_120  | Chisel        | 0,0116 | 0,31   | 89,6   | 0,497  | n/d    | 0,132  | 3,6    | 0,351  | 5,47   |

Tab. 3 (continued)

| Item code | Item type     | Fe [%] | Ni [%] | Cu [%] | As [%] | Co [%] | Ag [%] | Sn [%] | Sb [%] | Pb [%] |
|-----------|---------------|--------|--------|--------|--------|--------|--------|--------|--------|--------|
| KL03_125  | Sickle        | 0,244  | 0,252  | 93,2   | 0,989  | n/d    | 0,0943 | 4,02   | 0,505  | 0,687  |
| KL03_142  | Ingot         | 0,786  | 0,115  | 91,4   | 7,16   | 0,0164 | n/d    | 0,0423 | 0,39   | 0,0452 |
| KL03_149  | Ingot         | 1,02   | 0,338  | 97,3   | 0,238  | 0,0519 | 0,131  | 0,136  | 0,653  | 0,116  |
| KL03_150  | Droplet ingot | 1,11   | 0,645  | 86,3   | 2,36   | 0,153  | 0,187  | 3,73   | 0,581  | 4,97   |
| KL03_167  | Bracelet      | 0,096  | 0,147  | 90,1   | 0,682  | n/d    | 0,0301 | 7,74   | 0,421  | 0,765  |
| KL03_174  | Arrowhead     | 0,422  | 0,154  | 89,2   | 0,338  | n/d    | n/d    | 5,63   | 0,186  | 3,95   |
| KL04_002  | Knife         | 0,166  | 0,34   | 88,9   | 0,819  | 0,0277 | 0,0981 | 7,17   | 0,393  | 2,1    |
| KL04_003  | Bracelet      | 2,52   | 0,152  | 97,2   | n/d    | 0,0116 | n/d    | 0,0181 | 0,0959 | n/d    |
| KL04_004  | Ingot         | 0,0904 | 0,525  | 87,5   | 0,404  | 0,0258 | 0,0811 | 10,1   | 0,22   | 1,02   |
| KL04_005  | Axe           | 0,0866 | 0,453  | 86,6   | 3,33   | 0,0631 | 0,36   | 2,96   | 1,34   | 4,79   |
| KL04_006  | Chisel        | 0,076  | 0,0304 | 91,9   | n/d    | n/d    | n/d    | 7,08   | 0,28   | 0,598  |
| KL04_007  | Awl           | 0,039  | 0,531  | 92,8   | 0,53   | n/d    | 0,188  | 4,35   | 0,507  | 1,02   |
| KL04_009  | N/A           | 0,579  | 0,274  | 92,9   | n/d    | 0,0239 | 0,0269 | 5,63   | 0,142  | 0,379  |
| KL04_010  | N/A           | n/d    | 0,0925 | 97,8   | 1,9    | n/d    | 0,0095 | n/d    | 0,0894 | 0,0696 |
| KL04_011  | Droplet       | 0,465  | 0,747  | 91,7   | 0,842  | 0,0262 | 0,0324 | 4,53   | 0,213  | 1,4    |
| KL04_013  | Refuse        | 0,0799 | 0,445  | 95,6   | n/d    | 0,0295 | n/d    | 3,02   | 0,108  | 0,732  |
| KL04_015  | Refuse        | 0,228  | 0,103  | 93,1   | 0,539  | 0,0419 | n/d    | 5,14   | n/d    | 0,813  |
| KL04_016  | Droplet       | 3,91   | 0,771  | 87,2   | 1,28   | 0,0624 | n/d    | 5,88   | 0,255  | 0,597  |
| KL04_018  | Refuse        | 0,587  | 0,367  | 88,8   | 2,02   | 0,0631 | 0,146  | 5,44   | 0,677  | 1,85   |
| KL04_022  | Arrowhead     | 0,505  | 0,475  | 91,9   | n/d    | 0,0344 | 0,0233 | 6,28   | 0,105  | 0,457  |
| KL04_023  | Spear         | 0,206  | 0,443  | 90,2   | 0,343  | 0,0287 | n/d    | 7,72   | n/d    | 0,991  |
| KL04_024  | Sickle        | 0,0791 | 0,807  | 78     | 3,45   | 0,059  | 0,489  | 2,54   | 1,24   | 13,3   |
| KL04_026  | Ingot         | 3,01   | 2,27   | 93,4   | 1,19   | 0,0447 | n/d    | n/d    | n/d    | 0,121  |
| KL04_027  | Droplet       | 1,14   | n/d    | 94,1   | n/d    | 0,0443 | 0,0656 | 0,0378 | 0,107  | 4,41   |
| KL04_029  | Axe           | 0,0655 | 0,557  | 91,9   | 1,53   | 0,0253 | 0,166  | 4,04   | 0,462  | 1,25   |
| KL12_001  | Sickle        | 0,134  | 0,336  | 92,9   | n/d    | 0,0194 | n/d    | 5,02   | 0,146  | 1,4    |
| KL15_001  | Sickle        | 0,0985 | 0,556  | 93,4   | 0,207  | 0,0273 | n/d    | 4,31   | 0,223  | 1,22   |
| KL12_002  | Ingot         | 0,527  | 1,94   | 91,2   | 5,04   | 0,0111 | n/d    | n/d    | n/d    | 0,0334 |
| KL12_003  | Ingot         | 0,124  | 0,0383 | 99,7   | n/d    | n/d    | n/d    | 0,0998 | n/d    | n/d    |
| KL12_004  | Ingot         | 0,355  | 0,0588 | 99,3   | n/d    | 0,0083 | n/d    | 0,29   | n/d    | n/d    |
| KL12_005  | Ingot         | 0,216  | 0,0162 | 99,2   | n/d    | n/d    | n/d    | 0,133  | n/d    | n/d    |
| KL12_006  | Ingot         | 0,246  | 0,0591 | 93,4   | 5,92   | 0,0405 | n/d    | n/d    | n/d    | 0,0414 |
| KL13_003  | Spear         | 0,0734 | 0,436  | 88     | n/d    | 0,0294 | n/d    | 10,7   | 0,0994 | 0,583  |
| KL13_004  | Droplet       | n/d    | 0,0831 | 95,9   | 1,05   | n/d    | 1,1    | 1,22   | 0,554  | 0,0882 |
| KL13_005  | Ingot         | 0,189  | 0,754  | 99     | n/d    | 0,0369 | 0,0182 | 0,0333 | n/d    | n/d    |
| KL13_006  | Droplet       | 1,96   | 0,211  | 97,8   | n/d    | 0,0272 | n/d    | 0,0175 | n/d    | n/d    |
| KL14_002  | Sickle        | 0,115  | 0,698  | 91,3   | 0,177  | 0,0344 | 0,0279 | 6,67   | 0,113  | 0,834  |
| KL14_003  | Sickle        | 0,14   | 0,521  | 91,9   | 0,209  | 0,0297 | 0,0108 | 6,38   | n/d    | 0,834  |
| PA01_005  | Knife         | 0,127  | 0,146  | 86,4   | n/d    | 0,0183 | 0,0807 | 9,6    | 0,47   | 3,15   |
| PA01_006  | N/A           | 0,137  | 0,14   | 99,3   | n/d    | 0,282  | 0,0339 | 0,0338 | n/d    | 0,118  |
| PA01_010  | Droplet       | 0,179  | 0,845  | 89,1   | 0,556  | 0,148  | 0,191  | 6,48   | 0,542  | 1,92   |
| PA01_011  | Droplet       | 0,11   | 0,329  | 89,9   | 1,78   | 0,046  | 0,291  | 4,75   | 0,627  | 2,15   |
| PA01_012  | Droplet ingot | n/d    | 0,309  | 90,9   | 0,35   | 0,03   | 0,45   | 5,97   | 0,81   | 1,16   |
| PE01_007  | Sickle        | 0,03   | 0,0892 | 95,4   | n/d    | n/d    | n/d    | 4,42   | n/d    | 0,02   |
| PE01_010  | Dagger        | n/d    | 0,322  | 90,1   | n/d    | n/d    | 0,03   | 9,5    | n/d    | n/d    |
| PE01_012  | Torc          | 0,40   | 0,545  | 90,2   | 0,85   | 0,03   | n/d    | 7,87   | n/d    | 0,08   |
| PE01_014  | N/A           | n/d    | 0,0977 | 87,7   | n/d    | n/d    | n/d    | 12,20  | n/d    | n/d    |
| PE01_018  | Awl           | 0,068  | 0,0609 | 97,5   | 1,20   | 0,0079 | n/d    | n/d    | n/d    | 0,108  |
| PE01_019  | Ingot         | 2,67   | 0,189  | 97     | n/d    | 0,0679 | n/d    | n/d    | n/d    | 0,063  |
| PE01_021  | Ingot         | 1,8    | 0,496  | 97,4   | n/d    | 0,01   | n/d    | 0,101  | n/d    | 0,144  |
| PE01_023  | Droplet       | 0,0259 | 0,124  | 93,4   | 2,35   | n/d    | 0,43   | 3,23   | 0,23   | 0,168  |
| PE02_001  | Axe           | 0,07   | 0,0654 | 88,1   | n/d    | n/d    | n/d    | 11,50  | n/d    | 0,30   |
| PE02_002  | Ingot         | n/d    | 0,0536 | 99,9   | n/d    | n/d    | n/d    | n/d    | n/d    | n/d    |
| PE02_003  | Ingot         | 1,27   | 0,147  | 98,5   | n/d    | 0,0277 | n/d    | n/d    | 0,07   | n/d    |
| PE04_001  | Sickle        | 1,95   | 1,09   | 88,1   | 2,15   | 0,3    | n/d    | 4,74   | n/d    | 1,45   |
| PE04_004  | Ingot         | 3,92   | 0,807  | 94,8   | n/d    | 0,124  | 0,02   | 0,03   | n/d    | n/d    |

Tab. 3 (continued)

| Item code | Item type | Fe [%] | Ni [%] | Cu [%] | As [%] | Co [%] | Ag [%] | Sn [%] | Sb [%] | Pb [%] |
|-----------|-----------|--------|--------|--------|--------|--------|--------|--------|--------|--------|
| PE04_005  | Ingot     | 2,08   | 1,69   | 94,1   | 1,1    | 0,0411 | n/d    | n/d    | 0,68   | 0,329  |
| PA02_001  | Ingot     | 2,1    | 0,21   | 96,3   | 1,19   | 0,0288 | n/d    | n/d    | n/d    | 0,09   |
| KL02_043  | Ingot     | 1,08   | 0,157  | 98,6   | n/d    | 0,024  | n/d    | n/d    | 0,109  | n/d    |
| KL02_050  | Knife     | n/d    | 0,523  | 89,9   | 1,41   | 0,0359 | 0,287  | 5,38   | 0,941  | 1,47   |
| KL02_047  | Pin       | 0,07   | 1,85   | 92,3   | 1,22   | 0,04   | 0,0396 | 3,76   | 0,341  | 0,414  |
| KL02_044  | Knife     | n/d    | 0,383  | 92,3   | 0,95   | n/d    | 0,447  | 3,34   | 0,791  | 1,73   |
| KL02_029  | N/A       | 0,07   | 0,232  | 89,6   | n/d    | 0,02   | 0,0781 | 9,22   | 0,325  | 0,422  |
| KL02_045  | Button    | n/d    | 0,0157 | 95,6   | n/d    | n/d    | 0,206  | 3,96   | 0,16   | 0,0765 |
| KL02_049  | Chisel    | 0,0391 | 0,329  | 89,4   | n/d    | 0,0304 | 0,0414 | 9,33   | n/d    | 0,781  |



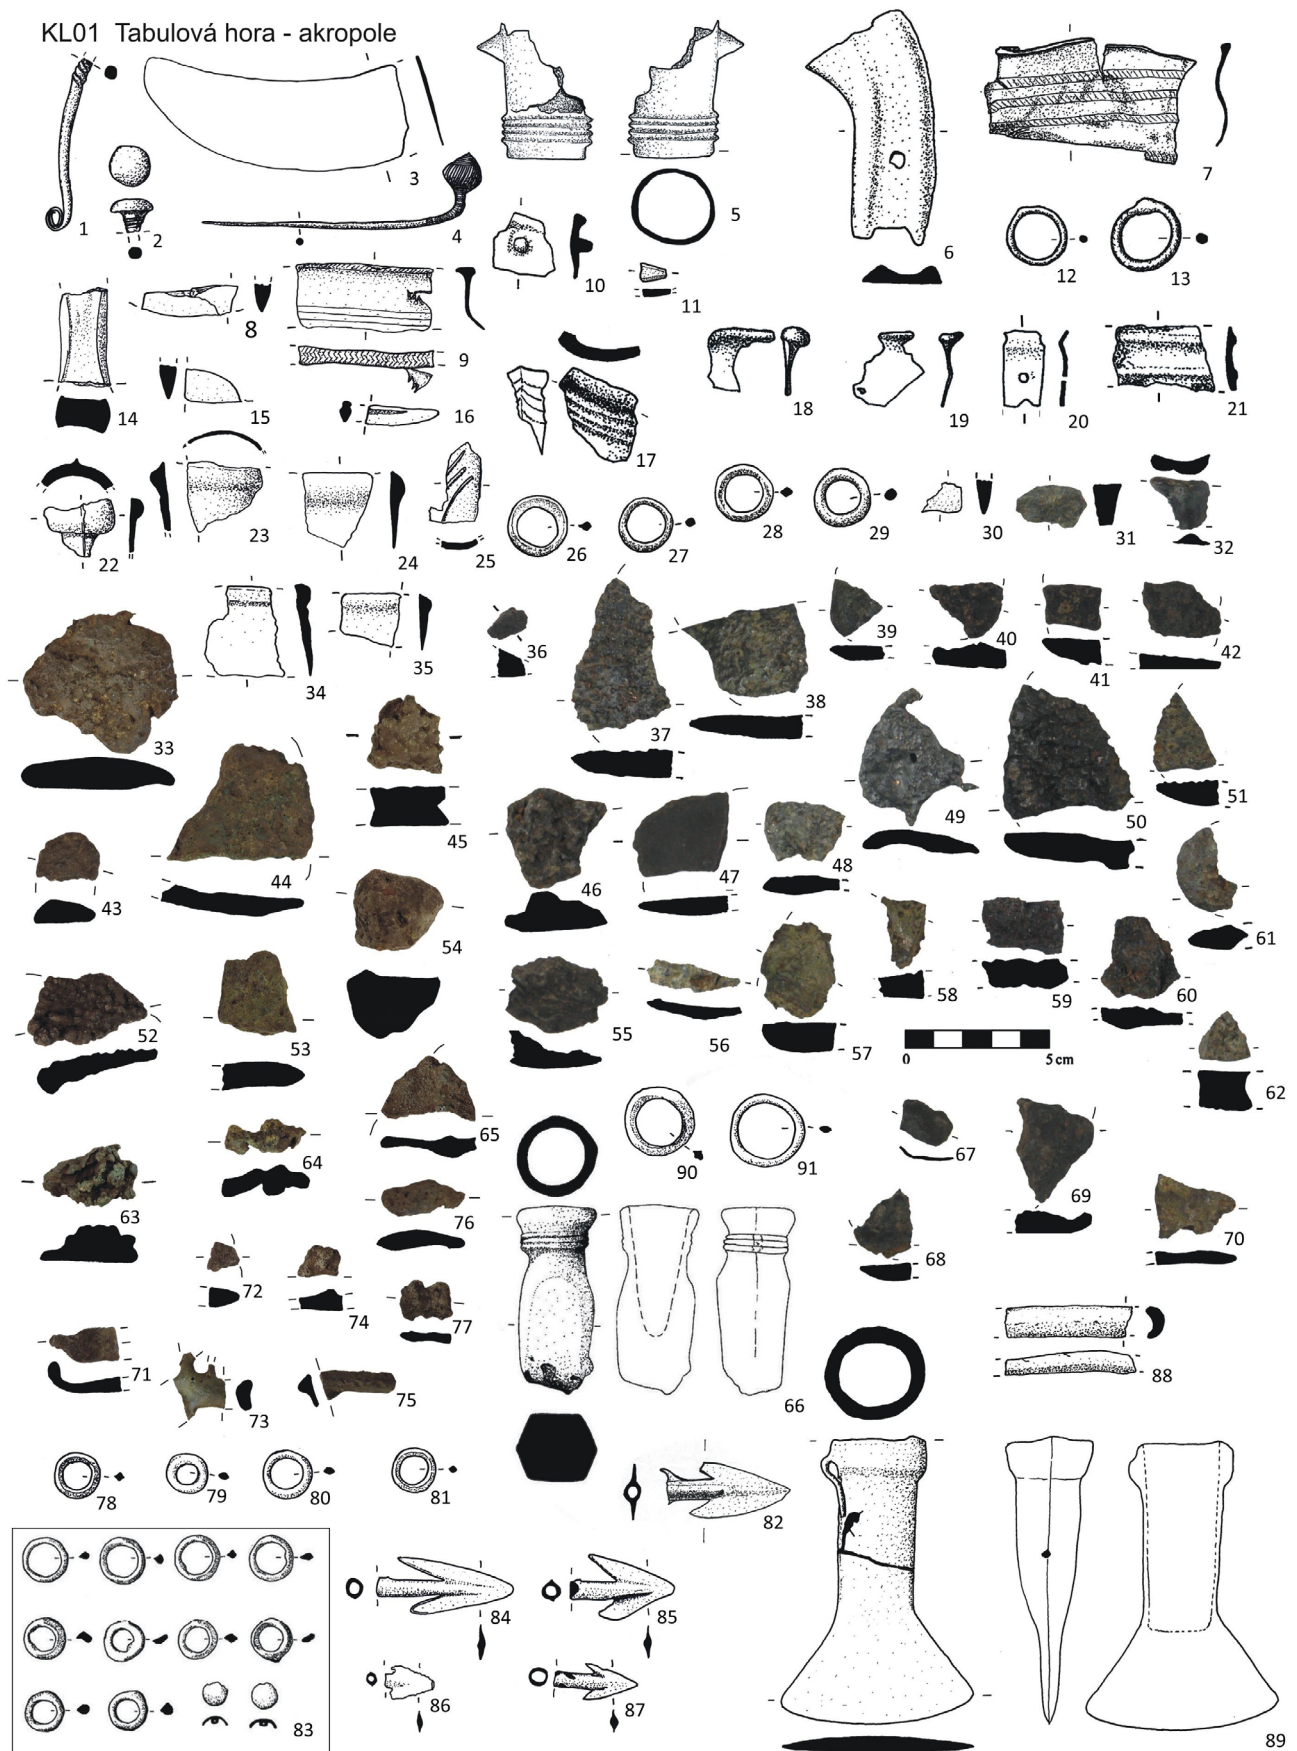

Supplementary Fig. 11: Items collected during the metal-detecting prospections on Pálava Hills between 2008–2022: KL01 Tabulová hora – akropole.

KL01 Tabulová hora - akropole

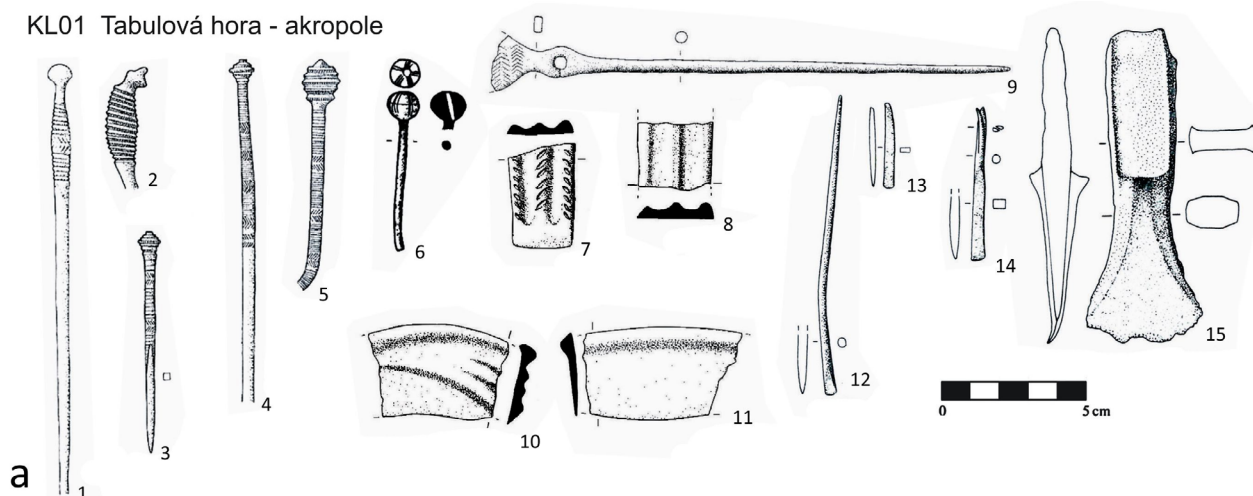

a

KL02 Tabulová hora - I. předhradí

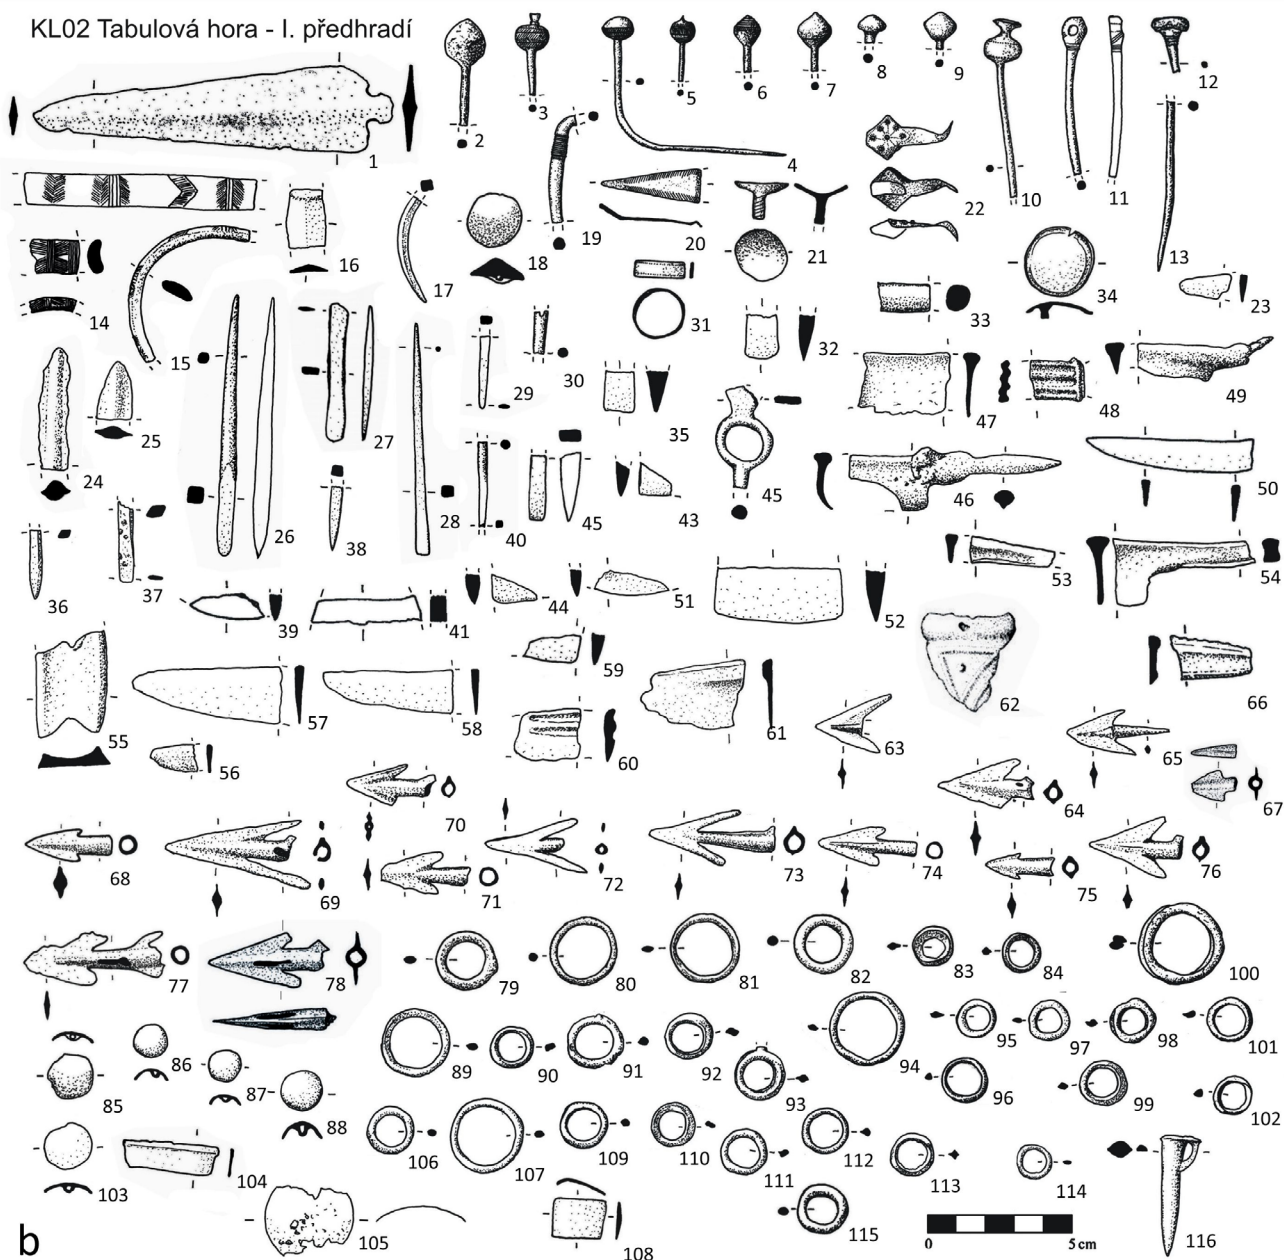

b

Supplementary Fig. 12: Items collected during the metal-detecting prospections on Pálava Hills between 2008–2022: A – KL01 Tabulová hora – akropole; B – KL02 Tabulová hora – I. Předhradí.



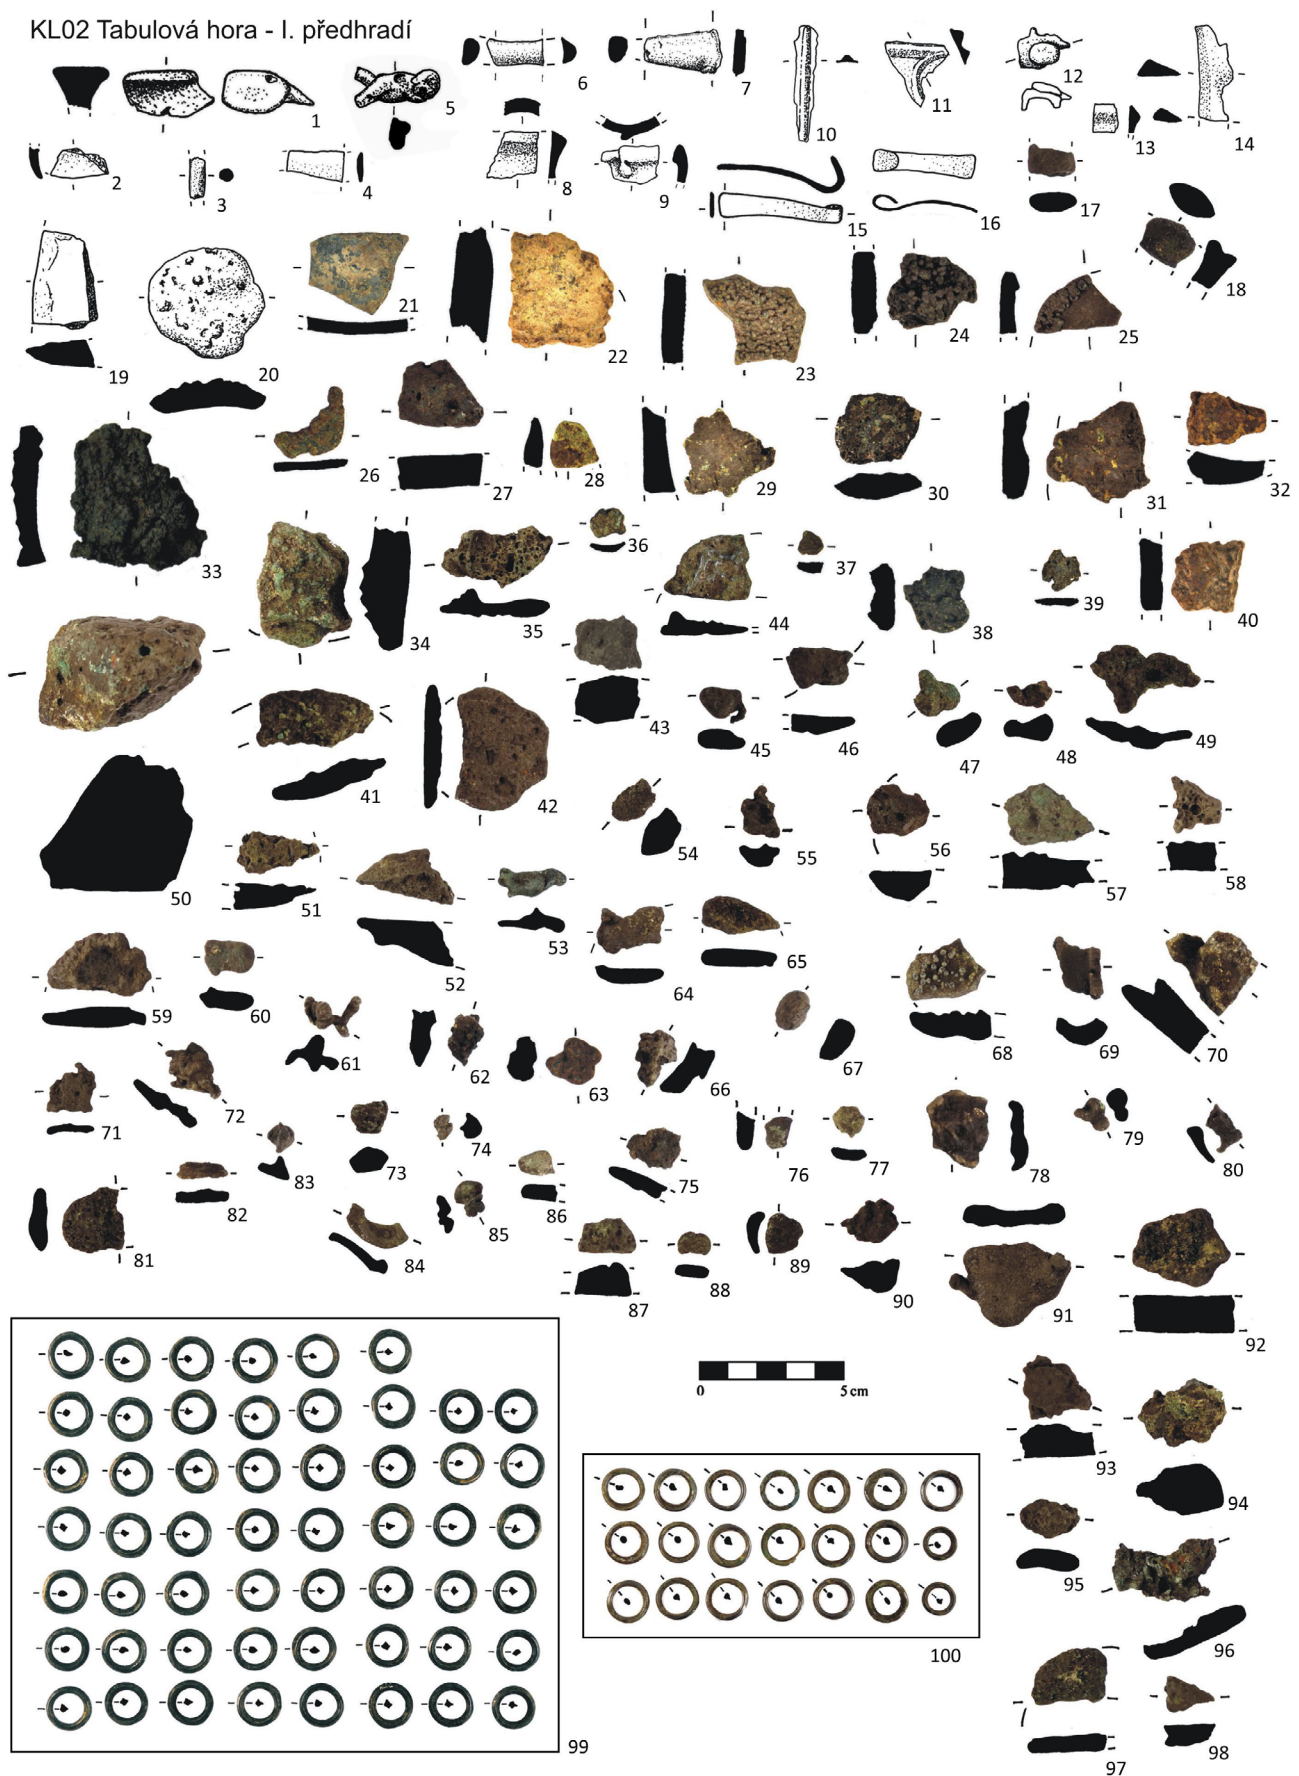

Supplementary Fig. 13: Items collected during the metal-detecting prospections on Pálava Hills between 2008–2022: KL02 Tabulová hora – I. Předhradí.

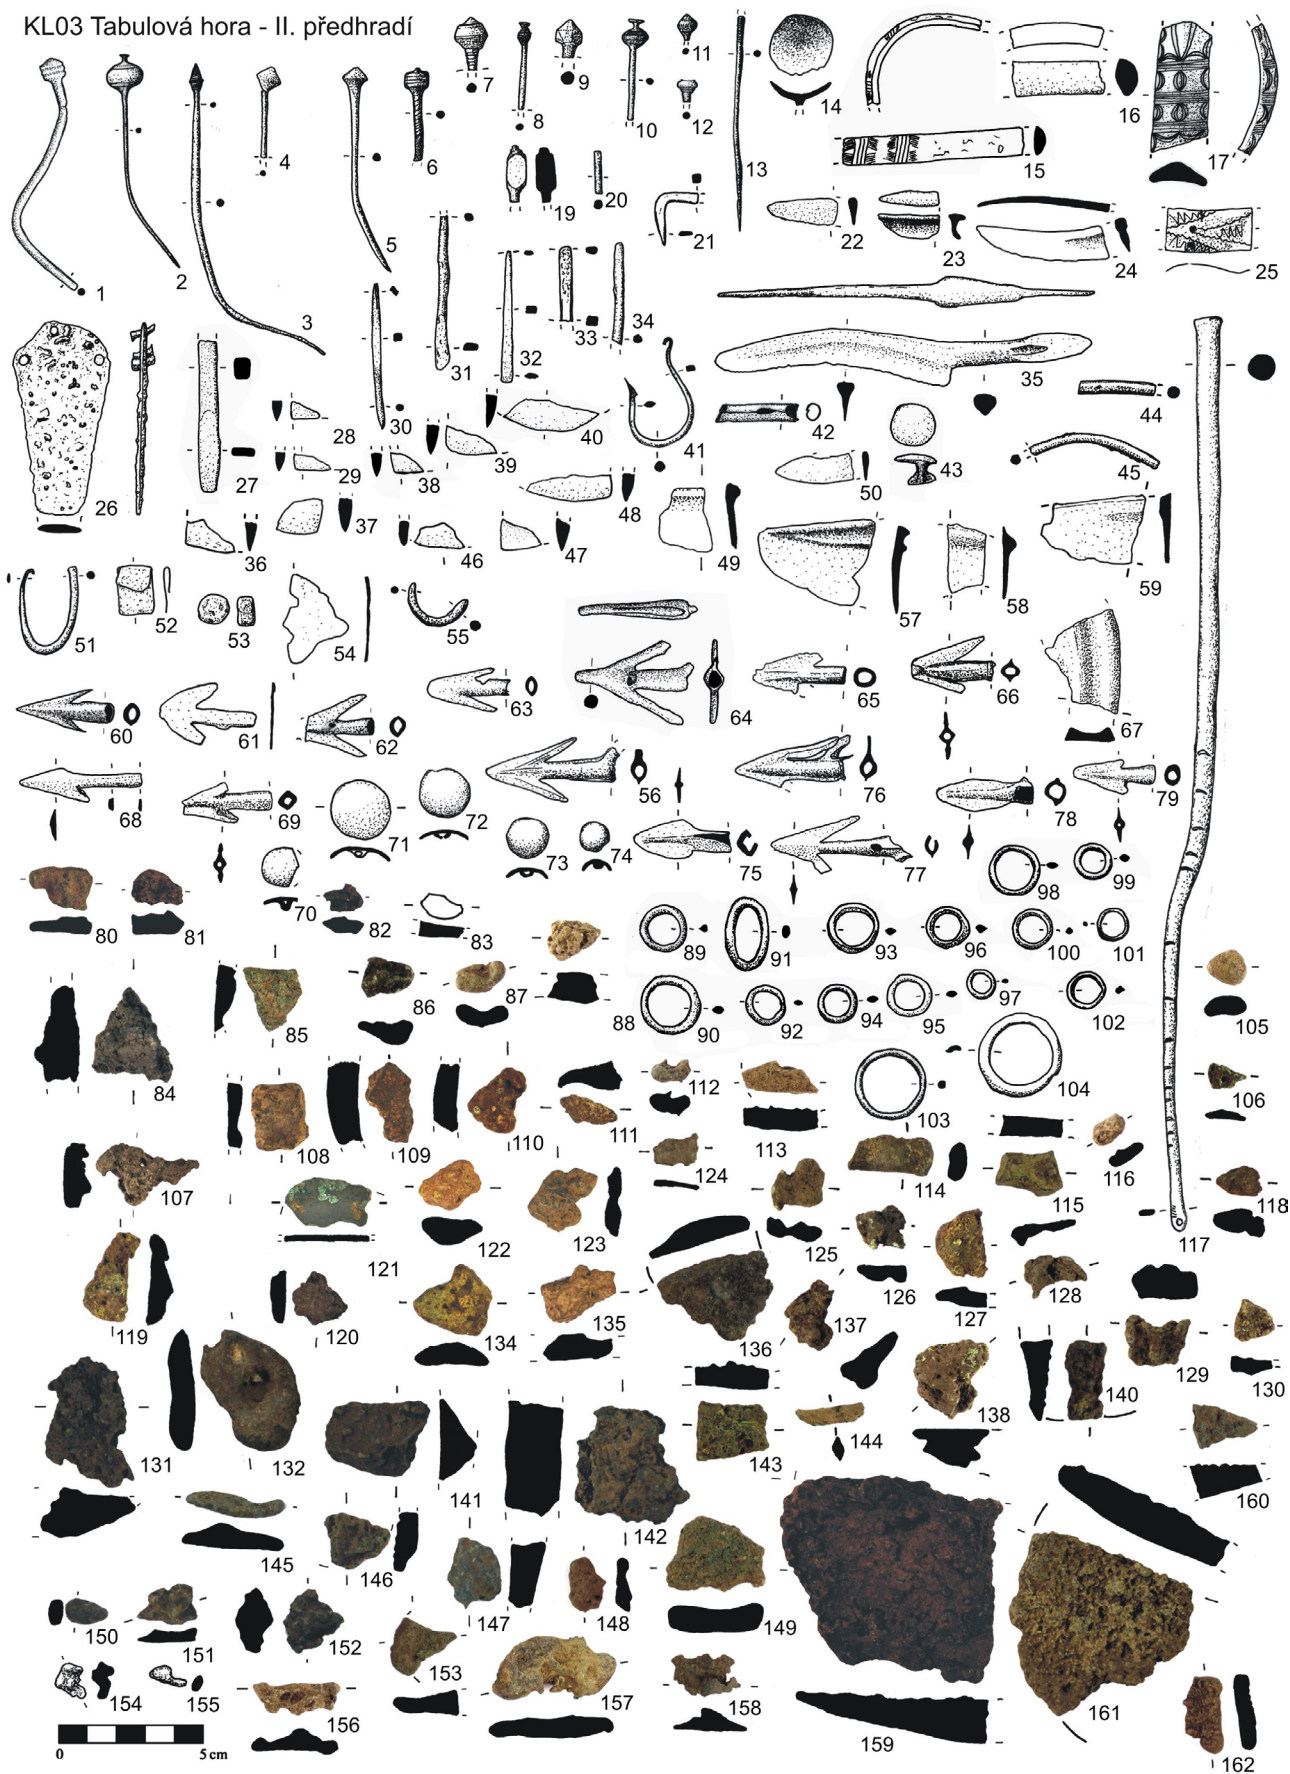

Supplementary Fig. 14: Items collected during the metal-detecting prospections on Pálava Hills between 2008–2022: KL03 Tabulová hora – II. Předhradí.



## KL03 Tabulová hora - II. předhradí

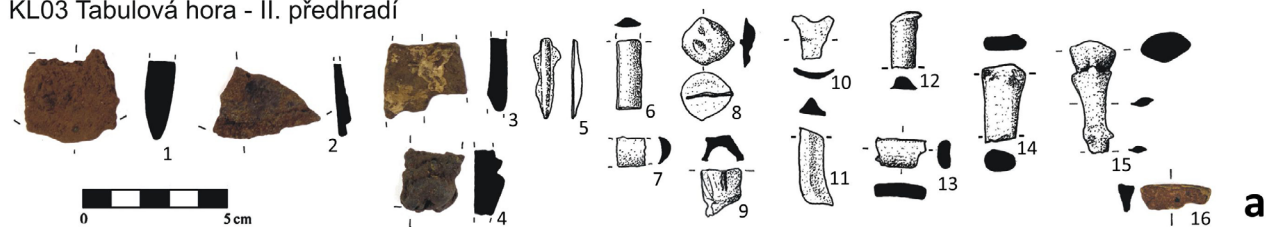

## KL04 Klentnice - Nad hřbitovem

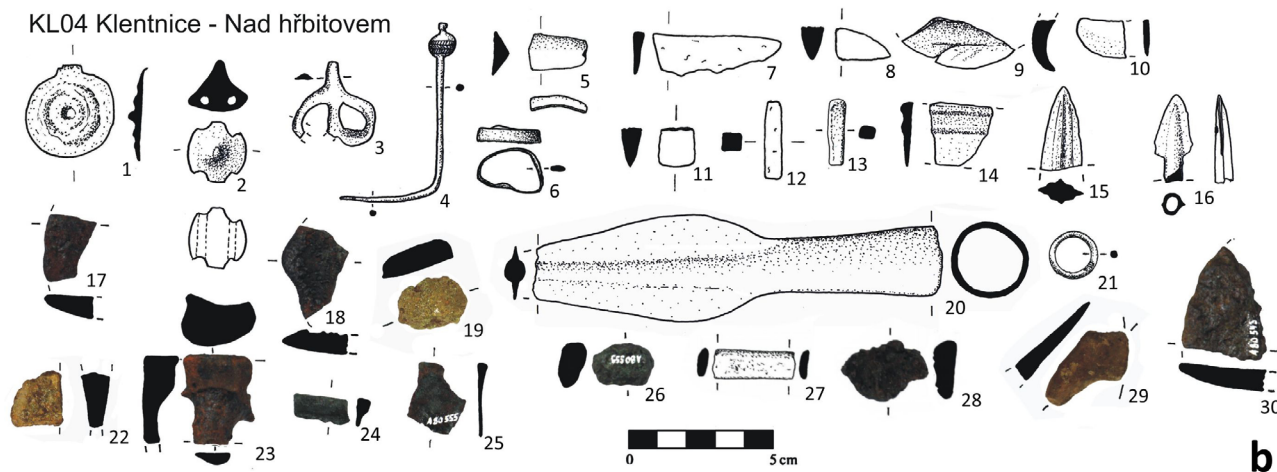

## KL06 Klentnice - Přední hony

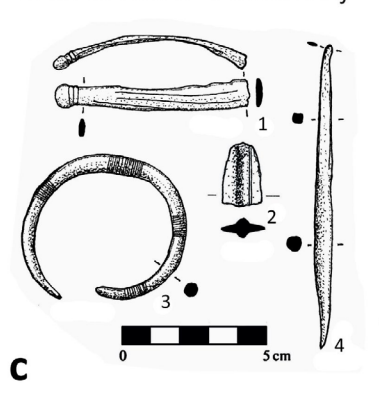

## KL10 Klentnice - U lomu

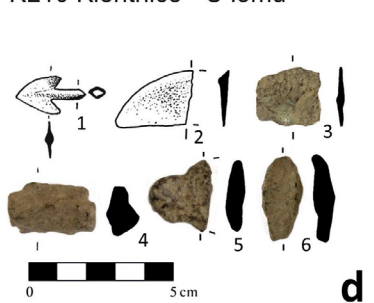

## KL11 Klentnice - Mezi vinohrady 1

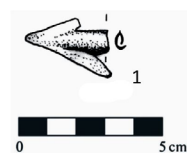

## KL12 Klentnice - Soustěska

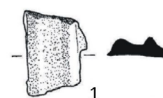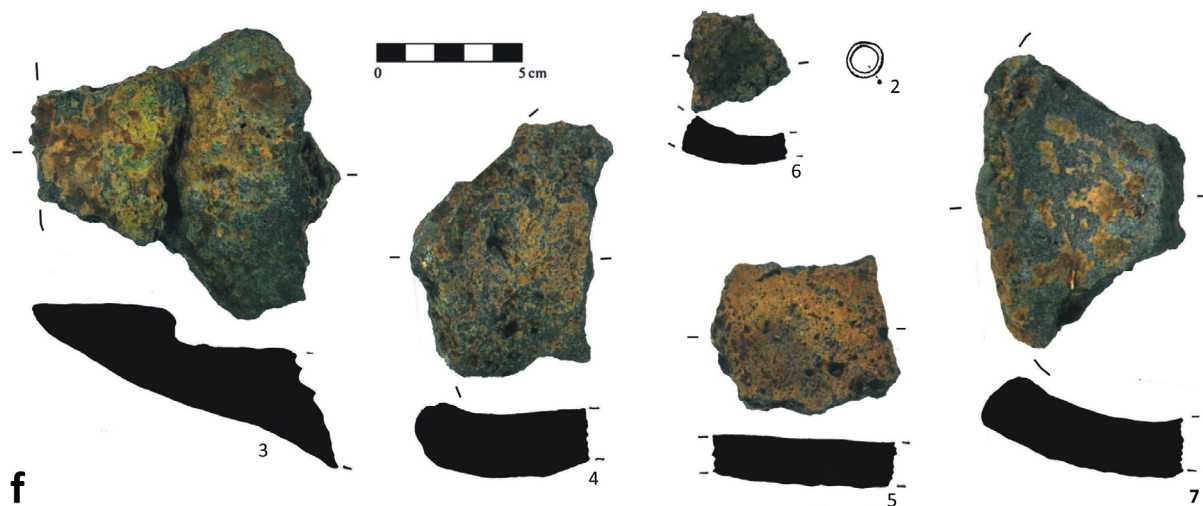

Supplementary Fig. 15: Items collected during the metal-detecting prospections on Pálava Hills between 2008–2022: A – KL03 Tabulová hora – II. předhradí; B – KL04 Klentnice – Nad hřbitovem; C – KL06 Klentnice – Přední hony; D – KL10 Klentnice – U lomu; E – KL11 Klentnice – Mezi vinohrady 1; F – KL12 Klentnice – Soustěska.

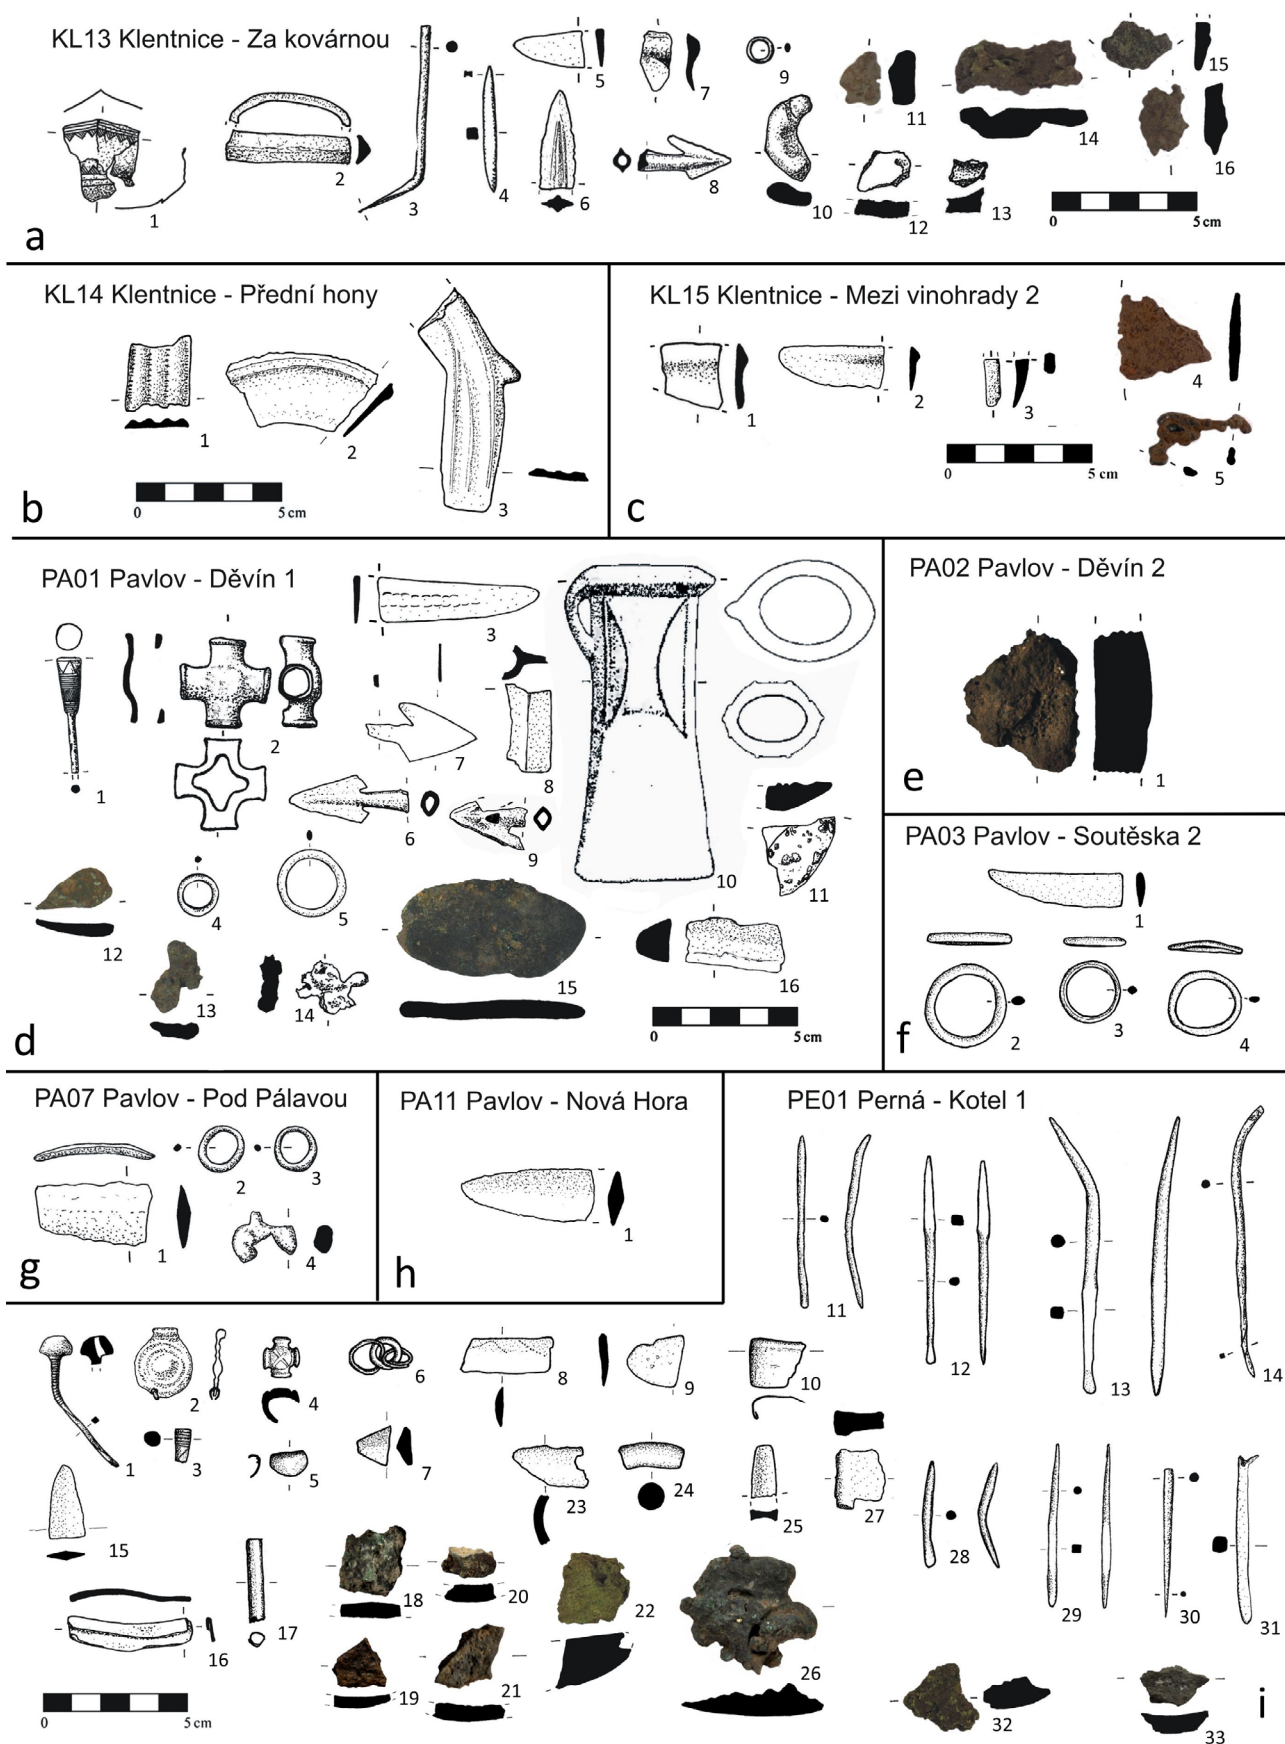

Supplementary Fig. 16: Items collected during the metal-detecting prospections on Pálava Hills between 2008–2022: A – KL13 Klentnice – Za kovárnou; B – KL14 Klentnice – Přední hony; C – KL15 Klentnice – Mezi vinohrady 2; D – PA01 Pavlov – Děvín 1; E – PA02 Pavlov – Děvín 2; F – PA03 Pavlov – Soutěska 2; G – PA07 Pavlov – Pod Pálavou; H – PA11 Pavlov – Nová hora; I – PE01 Perná – Kotel 1.

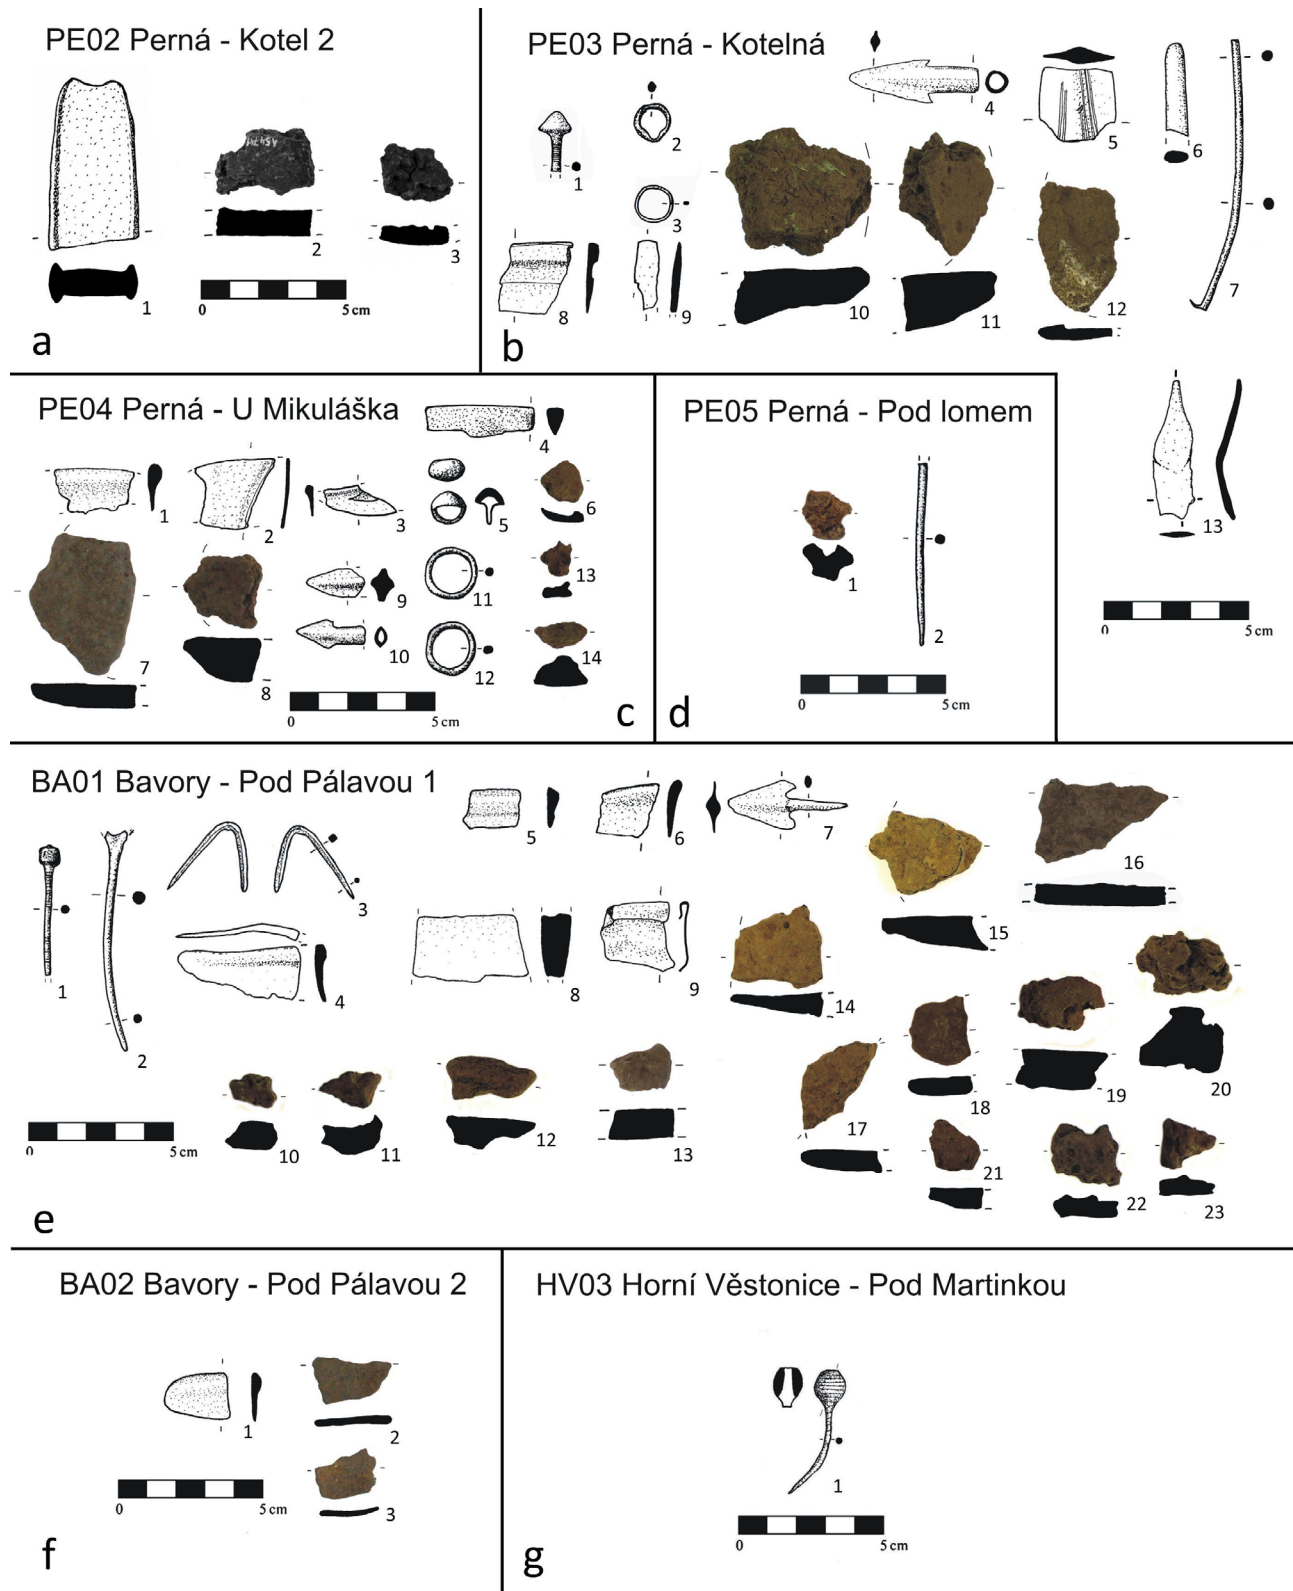

Supplementary Fig. 17: Items collected during the metal-detecting prospections on Pálava Hills between 2008–2022: A – PE02 Perná – Kotel 2; B – PE03 Perná – Kotelná; C – PE04 Perná – U Mikuláška; D – PE05 Perná – Pod lomem; E – BA01 Bavory – Pod Pálavou 01; F – BA02 Bavory – Pod Pálavou 2; G – HV03 Horní Věstonice – Pod Martinkou.
